# Supplementary material for: Taxonomic and ecologic transitions in Triassic marine bivalve communities
Source: PeerJ. 2025 May 9;13:e19237. doi: 10.7717/peerj.19237 (PMC12068250; doi:10.7717/peerj.19237)
Supplement: Supplemental Information 3 — Species-level taxonomic and ecological information for bivalve fossils, section data and species abundance. [file peerj-13-19237-s003.xlsx]

## Sheet: Sheet1
Section	Sample	Meters in section	Age resolution	Age	Stage	Genus resolution	Genus / subgenus or higher taxon	Species resolution	Species	Abundance	Mobility	Feeding	Tiering	Mode of life	Lithology	Depth	Taxonomic identification after	Remarks	Age and Stage remarks
Liangshuichong	LSC7	8.8	Griesbachian	Griesbachian	Induan		Unionites		fassaensis	2	4	1	3	3	siliciclastic	Shallow	Wissmann, 1841	"Unionites" is a problematic (see Foster et al., 2017). Here, we still use the most common options.
Liangshuichong	LSC7	8.8	Griesbachian	Griesbachian	Induan		Claraia		sp.	34	5	1	1	19	siliciclastic	Shallow	Bittner, 1901
Liangshuichong	LSC7	8.8	Griesbachian	Griesbachian	Induan		Claraia		wangi	147	5	1	1	19	siliciclastic	Shallow	Patte, 1935
Liangshuichong	LSC7	8.8	Griesbachian	Griesbachian	Induan		Claraia		aurita	1	5	1	1	19	siliciclastic	Shallow	Hauer, 1850	Also referred the Yang et al. 1986
Liangshuichong	LSC7	8.8	Griesbachian	Griesbachian	Induan		Eumorphotis		venetiana	1	2	1	1	4	siliciclastic	Shallow	Hauer, 1850
Liangshuichong	LSC7	8.8	Griesbachian	Griesbachian	Induan		Eumorphotis		sp.	3	2	1	1	4	siliciclastic	Shallow	Bittner, 1901
Liangshuichong	LSC11	50.3	Griesbachian	Griesbachian	Induan		Claraia		sp.	20	5	1	1	19	siliciclastic	Shallow	Bittner, 1901
Liangshuichong	LSC11	50.3	Griesbachian	Griesbachian	Induan		Claraia		wangi	26	5	1	1	19	siliciclastic	Shallow	Patte, 1935
Liangshuichong	LSC11	50.3	Griesbachian	Griesbachian	Induan		Claraia		griesbachi	1	5	1	1	19	siliciclastic	Shallow	Bittner, 1899
Liangshuichong	LSC11	50.3	Griesbachian	Griesbachian	Induan		Eumorphotis		sp.	1	2	1	1	4	siliciclastic	Shallow	Bittner, 1901
Liangshuichong	LSC11	50.3	Griesbachian	Griesbachian	Induan		Eumorphotis		venetiana	2	2	1	1	4	siliciclastic	Shallow	Hauer, 1850
Liangshuichong	LSC11	50.3	Griesbachian	Griesbachian	Induan		Promyalina		schamarae	1	2	1	1	4	siliciclastic	Shallow	Bittner, 1899
Liangshuichong	LSC11	50.3	Griesbachian	Griesbachian	Induan		Towapteria		scythica	9	2	1	2	16	siliciclastic	Shallow	Wirth,1936
Liangshuichong	LSC12	57.2	Griesbachian	Griesbachian	Induan		Claraia		aurita	40	5	1	1	19	siliciclastic	Shallow	Hauer, 1850	Also referred the Yang et al. 1986
Liangshuichong	LSC12	57.2	Griesbachian	Griesbachian	Induan		Claraia		sp.	54	5	1	1	19	siliciclastic	Shallow	Bittner, 1901
Liangshuichong	LSC12	57.2	Griesbachian	Griesbachian	Induan		Claraia		wangi	24	5	1	1	19	siliciclastic	Shallow	Patte, 1935
Liangshuichong	LSC12	57.2	Griesbachian	Griesbachian	Induan		Claraia		griesbachi	1	5	1	1	19	siliciclastic	Shallow	Bittner, 1899
Liangshuichong	LSC12	57.2	Griesbachian	Griesbachian	Induan		Pteria	variabilis	ussurica	2	2	1	1	4	siliciclastic	Shallow	Chen et Lan in Gu et al., 1976	This species belongs to Pteria variabilis ussurica according to Gu et al. (1976).
Liangshuichong	LSC14	81.7	Griesbachian	Griesbachian	Induan		Claraia		aurita	6	5	1	1	19	siliciclastic	Shallow	Hauer, 1850
Liangshuichong	LSC14	81.7	Griesbachian	Griesbachian	Induan		Claraia		griesbachi	2	5	1	1	19	siliciclastic	Shallow	Bittner, 1899
Liangshuichong	LSC14	81.7	Griesbachian	Griesbachian	Induan		Claraia		sp.	10	5	1	1	19	siliciclastic	Shallow	Bittner, 1901
Liangshuichong	LSC14	81.7	Griesbachian	Griesbachian	Induan		Claraia		wangi	9	5	1	1	19	siliciclastic	Shallow	Patte, 1935
Liangshuichong	LSC14	81.7	Griesbachian	Griesbachian	Induan		Pteria	variabilis	ussurica	1	2	1	1	4	siliciclastic	Shallow	Chen et Lan in Gu et al., 1976
Liangshuichong	LSC14	81.7	Griesbachian	Griesbachian	Induan		Towapteria		scythica	1	2	1	2	16	siliciclastic	Shallow	Wirth,1936
Liangshuichong	LSC16	94.8	Griesbachian	Griesbachian	Induan		Claraia		aurita	7	5	1	1	19	siliciclastic	Shallow	Hauer, 1850
Liangshuichong	LSC16	94.8	Griesbachian	Griesbachian	Induan		Claraia		griesbachi	8	5	1	1	19	siliciclastic	Shallow	Bittner, 1899
Liangshuichong	LSC16	94.8	Griesbachian	Griesbachian	Induan		Claraia		wangi	29	5	1	1	19	siliciclastic	Shallow	Patte, 1935
Liangshuichong	LSC16	94.8	Griesbachian	Griesbachian	Induan		Eumorphotis		sp.	1	2	1	1	4	siliciclastic	Shallow	Bittner, 1901
Liangshuichong	LSC16	94.8	Griesbachian	Griesbachian	Induan		Towapteria		scythica	7	2	1	2	16	siliciclastic	Shallow	Wirth,1936
Liangshuichong	LSC16	79.4	Griesbachian	Griesbachian	Induan		Pteria	variabilis	ussurica	1	2	1	1	4	siliciclastic	Shallow	Chen et Lan in Gu et al., 1976
Liangshuichong	LSC19	108.3	Griesbachian	Griesbachian	Induan		Unionites		fassaensis	1	4	1	3	3	siliciclastic	Shallow	Wissmann, 1841	"Unionites" is a problematic (see Foster et al., 2017). Here, we still use the most common options.
Liangshuichong	LSC19	108.3	Griesbachian	Griesbachian	Induan		Claraia		aurita	20	5	1	1	19	siliciclastic	Shallow	Hauer, 1850
Liangshuichong	LSC19	108.3	Griesbachian	Griesbachian	Induan		Claraia		griesbachi	51	5	1	1	19	siliciclastic	Shallow	Bittner, 1899
Liangshuichong	LSC19	105.9	Griesbachian	Griesbachian	Induan		Claraia		stachei	12	5	1	1	19	siliciclastic	Shallow	Bittner, 1901
Liangshuichong	LSC19	108.3	Griesbachian	Griesbachian	Induan		Claraia		sp.	106	5	1	1	19	siliciclastic	Shallow	Bittner, 1901
Liangshuichong	LSC19	108.3	Griesbachian	Griesbachian	Induan		Claraia		wangi	56	5	1	1	19	siliciclastic	Shallow	Patte, 1935
Liangshuichong	LSC19	108.3	Griesbachian	Griesbachian	Induan		Promyalina		schamarae	1	2	1	1	4	siliciclastic	Shallow	Bittner, 1899
Liangshuichong	LSC19	108.3	Griesbachian	Griesbachian	Induan		Eumorphotis		sp.	3	2	1	1	4	siliciclastic	Shallow	Bittner, 1901
Liangshuichong	LSC19	108.3	Griesbachian	Griesbachian	Induan		Pteria	variabilis	ussurica	1	2	1	1	4	siliciclastic	Shallow	Chen et Lan in Gu et al., 1976
Liangshuichong	LSC19	108.3	Griesbachian	Griesbachian	Induan		Towapteria		scythica	2	2	1	2	16	siliciclastic	Shallow	Wirth,1936
Liangshuichong	LSC19	108.3	Griesbachian	Griesbachian	Induan		Eumorphotis		multiformis	1	2	1	1	4	siliciclastic	Shallow	Bittner, 1899
Liangshuichong	LSC19	108.3	Griesbachian	Griesbachian	Induan		Neoschizodus		laevigatus	3	4	1	3	3	siliciclastic	Shallow	Ziethen, 1830
Liangshuichong	LSC20	111.8	Dienerian	Dienerian-Smithian	Induan		Claraia		aurita	1	5	1	1	19	siliciclastic	Shallow	Hauer, 1850	The age is Dienerian to Smithian. For the convenience of computing the code, only Dienerian is written here
Liangshuichong	LSC20	111.8	Dienerian	Dienerian-Smithian	Induan		Claraia		sp.	3	5	1	1	19	siliciclastic	Shallow	Bittner, 1901
Liangshuichong	LSC21	116.6	Dienerian	Dienerian-Smithian	Induan		Unionites		fassaensis	2	4	1	3	3	siliciclastic	Shallow	Wissmann, 1841	"Unionites" is a problematic (see Foster et al., 2017). Here, we still use the most common options.
Liangshuichong	LSC21	116.6	Dienerian	Dienerian-Smithian	Induan		Claraia		aurita	22	5	1	1	19	siliciclastic	Shallow	Hauer, 1850
Liangshuichong	LSC21	116.6	Dienerian	Dienerian-Smithian	Induan		Claraia		griesbachi	2	5	1	1	19	siliciclastic	Shallow	Bittner, 1899
Liangshuichong	LSC21	116.6	Dienerian	Dienerian-Smithian	Induan		Claraia		sp.	6	5	1	1	19	siliciclastic	Shallow	Bittner, 1901
Liangshuichong	LSC21	116.6	Dienerian	Dienerian-Smithian	Induan		Eumorphotis		venetiana	10	2	1	1	4	siliciclastic	Shallow	Hauer, 1850
Liangshuichong	LSC22	129.7	Dienerian	Dienerian-Smithian	Induan		Claraia		aurita	1	5	1	1	19	siliciclastic	Shallow	Hauer, 1850
Liangshuichong	LSC22	129.7	Dienerian	Dienerian-Smithian	Induan		Claraia		griesbachi	3	5	1	1	19	siliciclastic	Shallow	Bittner, 1899
Liangshuichong	LSC22	129.7	Dienerian	Dienerian-Smithian	Induan		Claraia		sp.	6	5	1	1	19	siliciclastic	Shallow	Bittner, 1901
Liangshuichong	LSC22	129.7	Dienerian	Dienerian-Smithian	Induan		Eumorphotis		multiformis	15	2	1	1	4	siliciclastic	Shallow	Bittner, 1899
Liangshuichong	LSC22	129.7	Dienerian	Dienerian-Smithian	Induan		Eumorphotis		sp.	11	2	1	1	4	siliciclastic	Shallow	Bittner, 1901
Liangshuichong	LSC22	129.7	Dienerian	Dienerian-Smithian	Induan		Eumorphotis		venetiana	10	2	1	1	4	siliciclastic	Shallow	Hauer, 1850
Liangshuichong	LSC22	129.7	Dienerian	Dienerian-Smithian	Induan		Pteria	variabilis	ussurica	1	2	1	1	4	siliciclastic	Shallow	Chen et Lan in Gu et al., 1976
Liangshuichong	LSC24	165.9	Dienerian	Dienerian-Smithian	Induan		Claraia		aurita	2	5	1	1	19	siliciclastic	Shallow	Hauer, 1850
Liangshuichong	LSC24	165.9	Dienerian	Dienerian-Smithian	Induan		Claraia		sp.	6	5	1	1	19	siliciclastic	Shallow	Bittner, 1901
Liangshuichong	LSC24	165.9	Dienerian	Dienerian-Smithian	Induan		Eumorphotis		sp.	2	2	1	1	4	siliciclastic	Shallow	Bittner, 1901
Liangshuichong	LSC27	179.9	Dienerian	Dienerian-Smithian	Induan		Claraia		griesbachi	2	5	1	1	19	siliciclastic	Shallow	Bittner, 1899
Liangshuichong	LSC27	179.9	Dienerian	Dienerian-Smithian	Induan		Claraia		aurita	2	5	1	1	19	siliciclastic	Shallow	Hauer, 1850
Liangshuichong	LSC27	179.9	Dienerian	Dienerian-Smithian	Induan		Claraia		sp.	15	5	1	1	19	siliciclastic	Shallow	Bittner, 1901
Liangshuichong	LSC29	196.7	Dienerian	Dienerian-Smithian	Induan		Claraia		aurita	5	5	1	1	19	siliciclastic	Shallow	Hauer, 1850
Liangshuichong	LSC29	196.7	Dienerian	Dienerian-Smithian	Induan		Claraia		stachei	2	5	1	1	19	siliciclastic	Shallow	Bittner, 1901
Liangshuichong	LSC29	196.7	Dienerian	Dienerian-Smithian	Induan		Claraia		sp.	4	5	1	1	19	siliciclastic	Shallow	Bittner, 1901
Liangshuichong	LSC29	196.7	Dienerian	Dienerian-Smithian	Induan		Eumorphotis		sp.	1	2	1	1	4	siliciclastic	Shallow	Bittner, 1901
Liangshuichong	LSC31	211.5	Dienerian	Dienerian-Smithian	Induan		Claraia		griesbachi	1	5	1	1	19	siliciclastic	Shallow	Bittner, 1899
Liangshuichong	LSC31	211.5	Dienerian	Dienerian-Smithian	Induan		Claraia		sp.	9	5	1	1	19	siliciclastic	Shallow	Bittner, 1901
Liangshuichong	LSC31	211.5	Dienerian	Dienerian-Smithian	Induan		Claraia		stachei	34	5	1	1	19	siliciclastic	Shallow	Bittner, 1901
Liangshuichong	LSC31	211.5	Dienerian	Dienerian-Smithian	Induan		Claraia		wangi	1	5	1	1	19	siliciclastic	Shallow	Patte, 1935
Liangshuichong	LSC31	211.5	Dienerian	Dienerian-Smithian	Induan		Eumorphotis		multiformis	1	2	1	1	4	siliciclastic	Shallow	Bittner, 1899
Liangshuichong	LSC32	216.5	Dienerian	Dienerian-Smithian	Induan		Claraia		stachei	1	5	1	1	19	siliciclastic	Shallow	Bittner, 1901
Liangshuichong	LSC33	223.1	Dienerian	Dienerian-Smithian	Induan		Claraia		aurita	5	5	1	1	19	siliciclastic	Shallow	Hauer, 1850
Liangshuichong	LSC33	223.1	Dienerian	Dienerian-Smithian	Induan		Claraia		sp.	2	5	1	1	19	siliciclastic	Shallow	Bittner, 1901
Liangshuichong	LSC33	223.1	Dienerian	Dienerian-Smithian	Induan		Claraia		stachei	37	5	1	1	19	siliciclastic	Shallow	Bittner, 1901
Liangshuichong	LSC33	223.1	Dienerian	Dienerian-Smithian	Induan		Claraia		wangi	1	5	1	1	19	siliciclastic	Shallow	Patte, 1935
Liangshuichong	LSC38	258.6	Dienerian	Dienerian-Smithian	Induan		Claraia		aurita	31	5	1	1	19	siliciclastic	Shallow	Hauer, 1850
Liangshuichong	LSC38	258.6	Dienerian	Dienerian-Smithian	Induan		Claraia		sp.	18	5	1	1	19	siliciclastic	Shallow	Bittner, 1901
Liangshuichong	LSC38	258.6	Dienerian	Dienerian-Smithian	Induan		Claraia		wangi	6	5	1	1	19	siliciclastic	Shallow	Patte, 1935
Liangshuichong	LSC38	258.6	Dienerian	Dienerian-Smithian	Induan		Unionites		canalensis	2	4	1	3	3	siliciclastic	Shallow	Catullo, 1847	"Unionites" is a problematic (see Foster et al., 2017). Here, we still use the most common options.
Liangshuichong	LSC39	271.6	Dienerian	Dienerian-Smithian	Induan		Claraia		aurita	12	5	1	1	19	siliciclastic	Shallow	Hauer, 1850
Liangshuichong	LSC39	271.6	Dienerian	Dienerian-Smithian	Induan		Claraia		griesbachi	2	5	1	1	19	siliciclastic	Shallow	Bittner, 1899
Liangshuichong	LSC39	271.6	Dienerian	Dienerian-Smithian	Induan		Claraia		sp.	6	5	1	1	19	siliciclastic	Shallow	Bittner, 1901
Liangshuichong	LSC39	271.6	Dienerian	Dienerian-Smithian	Induan		Eumorphotis		sp.	2	2	1	1	4	siliciclastic	Shallow	Bittner, 1901
Liangshuichong	LSC40	273.6	Dienerian	Dienerian-Smithian	Induan		Unionites		fassaensis	1	4	1	3	3	siliciclastic	Shallow	Wissmann, 1841	"Unionites" is a problematic (see Foster et al., 2017). Here, we still use the most common options.
Liangshuichong	LSC40	273.6	Dienerian	Dienerian-Smithian	Induan		Bakevellia		costata	2	2	1	2	16	siliciclastic	Shallow	Schlotheim, 1820
Liangshuichong	LSC40	273.6	Dienerian	Dienerian-Smithian	Induan		Claraia		aurita	15	5	1	1	19	siliciclastic	Shallow	Hauer, 1850
Liangshuichong	LSC40	273.6	Dienerian	Dienerian-Smithian	Induan		Claraia		sp.	11	5	1	1	19	siliciclastic	Shallow	Bittner, 1901
Liangshuichong	LSC40	273.6	Dienerian	Dienerian-Smithian	Induan		Claraia		wangi	2	5	1	1	19	siliciclastic	Shallow	Patte, 1935
Liangshuichong	LSC40	273.6	Dienerian	Dienerian-Smithian	Induan		Promyalina		schamarae	1	2	1	1	4	siliciclastic	Shallow	Bittner, 1899
Liangshuichong	LSC40	273.6	Dienerian	Dienerian-Smithian	Induan		Unionites		canalensis	7	4	1	3	3	siliciclastic	Shallow	Wissmann, 1841	"Unionites" is a problematic (see Foster et al., 2017). Here, we still use the most common options. This holotype reference can not be found. The taxonomy after Biakov and Kutygin (2021).
Liangshuichong	LSC40	273.6	Dienerian	Dienerian-Smithian	Induan		Modiolus		guanlingensis	2	2	1	2	16	siliciclastic	Shallow	Huang, 2014
Liangshuichong	LSC40	273.6	Dienerian	Dienerian-Smithian	Induan		Neoschizodus		laevigatus	7	4	1	3	3	siliciclastic	Shallow	Ziethen, 1830
Liangshuichong	LSC41	283.1	Dienerian	Dienerian-Smithian	Induan		Bakevellia		costata	1	2	1	2	16	siliciclastic	Shallow	Schlotheim, 1820
Liangshuichong	LSC41	283.1	Dienerian	Dienerian-Smithian	Induan		Bakevellia		subpannonica	2	2	1	2	16	siliciclastic	Shallow	Schlotheim, 1820
Liangshuichong	LSC41	283.1	Dienerian	Dienerian-Smithian	Induan		Claraia		stachei	1	5	1	1	19	siliciclastic	Shallow	Bittner, 1901
Liangshuichong	LSC42	287.1	Dienerian	Dienerian-Smithian	Induan		Claraia		aurita	5	5	1	1	19	siliciclastic	Shallow	Hauer, 1850
Liangshuichong	LSC42	287.1	Dienerian	Dienerian-Smithian	Induan		Claraia		griesbachi	1	5	1	1	19	siliciclastic	Shallow	Bittner, 1899
Liangshuichong	LSC42	287.1	Dienerian	Dienerian-Smithian	Induan		Claraia		sp.	5	5	1	1	19	siliciclastic	Shallow	Bittner, 1901
Liangshuichong	LSC46	314.9	Smithian	Smithian	Olenekian		Unionites		fassaensis	1	4	1	3	3	siliciclastic	Shallow	Wissmann, 1841	"Unionites" is a problematic (see Foster et al., 2017). Here, we still use the most common options.
Liangshuichong	LSC46	314.9	Smithian	Smithian	Olenekian		Claraia		griesbachi	14	5	1	1	19	siliciclastic	Shallow	Bittner, 1899
Liangshuichong	LSC46	314.9	Smithian	Smithian	Olenekian		Claraia		sp.	15	5	1	1	19	siliciclastic	Shallow	Bittner, 1901
Liangshuichong	LSC46	314.9	Smithian	Smithian	Olenekian		Claraia		wangi	1	5	1	1	19	siliciclastic	Shallow	Patte, 1935
Liangshuichong	LSC46	314.9	Smithian	Smithian	Olenekian		Eumorphotis		multiformis	5	2	1	1	4	siliciclastic	Shallow	Bittner, 1899
Liangshuichong	LSC46	314.9	Smithian	Smithian	Olenekian		Eumorphotis		sp.	5	2	1	1	4	siliciclastic	Shallow	Bittner, 1901
Liangshuichong	LSC46	314.9	Smithian	Smithian	Olenekian		Eumorphotis		venetiana	13	2	1	1	4	siliciclastic	Shallow	Hauer, 1850
Liangshuichong	LSC46	314.9	Smithian	Smithian	Olenekian		Leptochondria		virgalensis	11	2	1	1	4	siliciclastic	Shallow	Wittenburg, 1909
Liangshuichong	LSC46	314.9	Smithian	Smithian	Olenekian		Leptochondria		sp.	15	2	1	1	4	siliciclastic	Shallow	Bittner, 1891
Liangshuichong	LSC46	314.9	Smithian	Smithian	Olenekian		Permophorus		bregeri	1	4	1	3	3	siliciclastic	Shallow	Girty, 1927	According to Quiroz-Barroso and Perrilliat (1998), Permophorus was an endobyssate bivalve, but none of the specimens described in the literature show a byssal notch or gape.
Liangshuichong	LSC46	314.9	Smithian	Smithian	Olenekian		Unionites		canalensis	12	4	1	3	3	siliciclastic	Shallow	Wissmann, 1841	"Unionites" is a problematic (see Foster et al., 2017). Here, we still use the most common options.
Liangshuichong	LSC52	347.9	Smithian	Smithian	Olenekian		Eumorphotis		multiformis	2	2	1	1	4	siliciclastic	Shallow	Bittner, 1899
Liangshuichong	LSC52	347.9	Smithian	Smithian	Olenekian		Eumorphotis		sp.	9	2	1	1	4	siliciclastic	Shallow	Bittner, 1901
Liangshuichong	LSC52	347.9	Smithian	Smithian	Olenekian		Eumorphotis		venetiana	2	2	1	1	4	siliciclastic	Shallow	Hauer, 1850
Liangshuichong	LSC52	347.9	Smithian	Smithian	Olenekian		Permophorus		bregeri	10	4	1	3	3	siliciclastic	Shallow	Girty, 1927	According to Quiroz-Barroso and Perrilliat (1998), Permophorus was an endobyssate bivalve, but none of the specimens described in the literature show a byssal notch or gape.
Liangshuichong	LSC52	347.9	Smithian	Smithian	Olenekian		Promyalina		sp.	1	2	1	1	4	siliciclastic	Shallow	Bittner, 1899
Liangshuichong	LSC52	347.9	Smithian	Smithian	Olenekian		Unionites		canalensis	2	4	1	3	3	siliciclastic	Shallow	Catullo, 1847	"Unionites" is a problematic (see Foster et al., 2017). Here, we still use the most common options.
Liangshuichong	LSC55	381.9	Smithian	Smithian	Olenekian		Eumorphotis		sp.	1	2	1	1	4	siliciclastic	Shallow	Bittner, 1901
Liangshuichong	LSC57	401.9	Smithian	Smithian	Olenekian		Claraia		sp.	9	5	1	1	19	siliciclastic	Shallow	Bittner, 1901
Liangshuichong	LSC57	401.9	Smithian	Smithian	Olenekian		Eumorphotis		multiformis	7	2	1	1	4	siliciclastic	Shallow	Bittner, 1899
Liangshuichong	LSC57	401.9	Smithian	Smithian	Olenekian		Eumorphotis		sp.	2	2	1	1	4	siliciclastic	Shallow	Bittner, 1901
Liangshuichong	LSC57	401.9	Smithian	Smithian	Olenekian		Eumorphotis		venetiana	1	2	1	1	4	siliciclastic	Shallow	Hauer, 1850
Liangshuichong	LSC58	425.4	Smithian	Smithian	Olenekian		Unionites		fassaensis	7	4	1	3	3	siliciclastic	Shallow	Wissmann, 1841
Liangshuichong	LSC58	425.4	Smithian	Smithian	Olenekian		Claraia		sp.	1	5	1	1	19	siliciclastic	Shallow	Bittner, 1901
Liangshuichong	LSC58	425.4	Smithian	Smithian	Olenekian		Eumorphotis		multiformis	2	2	1	1	4	siliciclastic	Shallow	Bittner, 1899
Liangshuichong	LSC58	425.4	Smithian	Smithian	Olenekian		Eumorphotis		sp.	2	2	1	1	4	siliciclastic	Shallow	Bittner, 1901
Liangshuichong	LSC58	425.4	Smithian	Smithian	Olenekian		Permophorus		bregeri	1	4	1	3	3	siliciclastic	Shallow	Girty, 1927	According to Quiroz-Barroso and Perrilliat (1998), Permophorus was an endobyssate bivalve, but none of the specimens described in the literature show a byssal notch or gape.
Liangshuichong	LSC58	425.4	Smithian	Smithian	Olenekian		Promyalina		schamarae	6	2	1	1	4	siliciclastic	Shallow	Bittner, 1899
Liangshuichong	LSC58	425.4	Smithian	Smithian	Olenekian		Unionites		canalensis	3	4	1	3	3	siliciclastic	Shallow	Catullo, 1847	Foster et al. (2017) suggested it assigned to Austrotindaria? canalensis rather than Unionites canalensis
Hehuachi	HHC1	9	Julian1	Julian	Carnian		Bositra	robusta	wengensis	2	1	1	1	12	siliciclastic	Shallow	Wissmann, 1841		The age is Julian. In order to calculate diversification rates between communities, a distinction is made here between 1 and 2.
Hehuachi	HHC1	9	Julian1	Julian	Carnian		Halobia		rugosa	1	5	1	1	19	siliciclastic	Shallow	Guembel, 1861
Hehuachi	HHC1	9	Julian1	Julian	Carnian		Nuculana		sp.	1	6	2	3	2	siliciclastic	Shallow	Goldfuss, 1837
Hehuachi	HHC3	87	Julian1	Julian	Carnian		Bositra	robusta	wengensis	2	1	1	1	12	siliciclastic	Shallow	Wissmann, 1841
Hehuachi	HHC4	100	Julian1	Julian	Carnian		Bositra	robusta	wengensis	26	1	1	1	12	siliciclastic	Shallow	Wissmann, 1841
Hehuachi	HHC4	100	Julian1	Julian	Carnian		Halobia		rugosa	2	1	1	1	12	siliciclastic	Shallow	Guembel, 1861	Many authors have speculated about mode of life of halobiids. Del Piero et al. (2020) suggested it as an epibenthic recliner, an early (larval) planktonic/nektonic stage. Here, we agree with this opinion.
Hehuachi	HHC6	105	Julian1	Julian	Carnian		Bositra		wengensis	115	1	1	1	12	siliciclastic	Shallow	Wissmann, 1841
Hehuachi	HHC6	105	Julian1	Julian	Carnian		Halobia		rugosa	7	5	1	1	19	siliciclastic	Shallow	Guembel, 1861
Hehuachi	HHC6	105	Julian1	Julian	Carnian		Palaeoneilo		elliptica	2	6	2	3	2	siliciclastic	Shallow	Goldfuss, 1837
Hehuachi	HHC6	105	Julian1	Julian	Carnian		Pteria		sp.	2	2	1	1	4	siliciclastic	Shallow	Goldfuss, 1837
Hehuachi	HHC7	109	Julian1	Julian	Carnian		Bositra	robusta	wengensis	212	1	1	1	12	siliciclastic	Shallow	Wissmann, 1841
Hehuachi	HHC7	109	Julian1	Julian	Carnian		Halobia		rugosa	54	5	1	1	19	siliciclastic	Shallow	Guembel, 1861
Hehuachi	HHC7	109	Julian1	Julian	Carnian		Nuculana		timorensis	4	6	2	3	2	siliciclastic	Shallow	Goldfuss, 1837
Hehuachi	HHC7	109	Julian1	Julian	Carnian		Palaeoneilo		elliptica	1	6	2	3	2	siliciclastic	Shallow	Goldfuss, 1837
Hehuachi	HHC8a	116	Julian1	Julian	Carnian		Bositra	robusta	wengensis	191	1	1	1	12	siliciclastic	Shallow	Wissmann, 1841
Hehuachi	HHC8a	116	Julian1	Julian	Carnian		Costatoria		radiata	15	4	1	3	3	siliciclastic	Shallow	Loczy, 1899
Hehuachi	HHC8a	116	Julian1	Julian	Carnian		Entolium		rotundum	3	4	1	1	7	siliciclastic	Shallow	Chen in Gu et al., 1976
Hehuachi	HHC8a	116	Julian1	Julian	Carnian		Halobia		rugosa	13	5	1	1	19	siliciclastic	Shallow	Guembel, 1861
Hehuachi	HHC8a	116	Julian1	Julian	Carnian		Homomya		ambigua	2	4	1	4	14	siliciclastic	Shallow		After Márquez-Aliaga, 1985
Hehuachi	HHC8a	116	Julian1	Julian	Carnian		Leptochondria		sp.	4	2	1	1	4	siliciclastic	Shallow	Bittner, 1891
Hehuachi	HHC8a	116	Julian1	Julian	Carnian		Neoschizodus		laevigatus	12	4	1	3	3	siliciclastic	Shallow	Ziethen, 1830
Hehuachi	HHC8a	116	Julian1	Julian	Carnian		Nuculana		timorensis	2	6	2	3	2	siliciclastic	Shallow	Goldfuss, 1837
Hehuachi	HHC8a	116	Julian1	Julian	Carnian		Palaeoneilo		elliptica	35	6	2	3	2	siliciclastic	Shallow	Goldfuss, 1837
Hehuachi	HHC8b	117	Julian1	Julian	Carnian		Bositra	robusta	wengensis	549	1	1	1	12	siliciclastic	Shallow	Wissmann, 1841
Hehuachi	HHC8b	117	Julian1	Julian	Carnian		Entolium		rotundum	4	4	1	1	7	siliciclastic	Shallow	Chen in Gu et al., 1976
Hehuachi	HHC8b	117	Julian1	Julian	Carnian		Chlamys		sp.	1	1	1	1	19	siliciclastic	Shallow	Röding, 1798	We didn't find the holotype, identified after Gou, 1993
Hehuachi	HHC8b	117	Julian1	Julian	Carnian		Halobia		rugosa	17	5	1	1	19	siliciclastic	Shallow	Guembel, 1861
Hehuachi	HHC8c	119	Julian1	Julian	Carnian		Bositra	robusta	wengensis	482	1	1	1	12	siliciclastic	Shallow	Wissmann, 1841
Hehuachi	HHC8c	119	Julian1	Julian	Carnian		Cultriopsis		sp.	1	2	1	2	16	siliciclastic	Shallow	Cox et al. ,1969	Following Cox and others (1969, p. 308), Cultriopsis is regarded as a subgenus of Gervillia.
Hehuachi	HHC8c	119	Julian1	Julian	Carnian		Halobia		rugosa	50	5	1	1	19	siliciclastic	Shallow	Guembel, 1861
Hehuachi	HHC8c	119	Julian1	Julian	Carnian		Nuculana		timorensis	8	6	2	3	2	siliciclastic	Shallow	Goldfuss, 1837
Hehuachi	HHC8c	119	Julian1	Julian	Carnian		Palaeoneilo		elliptica	18	6	2	3	2	siliciclastic	Shallow	Goldfuss, 1837
Hehuachi	HHC8c	119	Julian1	Julian	Carnian		Palaeonucula	curtiformis	strigilata	4	6	2	3	2	siliciclastic	Shallow	Gou, 1993
Hehuachi	HHC8d	121	Julian1	Julian	Carnian		Bositra	robusta	wengensis	135	1	1	1	12	siliciclastic	Shallow	Wissmann, 1841
Hehuachi	HHC8d	121	Julian1	Julian	Carnian		Halobia		rugosa	53	5	1	1	19	siliciclastic	Shallow	Guembel, 1861
Hehuachi	HHC8d	121	Julian1	Julian	Carnian		Palaeoneilo		elliptica	6	6	2	3	2	siliciclastic	Shallow	Goldfuss, 1837
Hehuachi	HHC8e	122	Julian1	Julian	Carnian		Bositra	robusta	wengensis	271	1	1	1	12	siliciclastic	Shallow	Wissmann, 1841
Hehuachi	HHC8e	122	Julian1	Julian	Carnian		Halobia		rugosa	64	5	1	1	19	siliciclastic	Shallow	Guembel, 1861
Hehuachi	HHC8e	122	Julian1	Julian	Carnian		Palaeoneilo		elliptica	6	6	2	3	2	siliciclastic	Shallow	Goldfuss, 1837
Hehuachi	HHC10	137	Julian2	Julian	Carnian		Atreta		sp.	2	3	1	1	1	siliciclastic	Shallow	Etallon, 1862
Hehuachi	HHC10	137	Julian2	Julian	Carnian		Costatoria		radiata	18	4	1	3	3	siliciclastic	Shallow	Loczy, 1899
Hehuachi	HHC10	137	Julian2	Julian	Carnian	?	Cercomya		sp.	5	4	1	4	14	siliciclastic	Shallow	Agassiz, 1843
Hehuachi	HHC10	137	Julian2	Julian	Carnian		Entolium		rotundum	3	4	1	1	7	siliciclastic	Shallow	Chen in Gu et al., 1976
Hehuachi	HHC10	137	Julian2	Julian	Carnian		Chlamys		sp.	26	4	1	1	7	siliciclastic	Shallow	Röding, 1798	We didn't find the holotype, identified after Gou, 1993
Hehuachi	HHC10	137	Julian2	Julian	Carnian		Cultriopsis		sp.	3	2	1	2	16	siliciclastic	Shallow	Cox et al. ,1969	Following Cox and others (1969, p. 308), Cultriopsis is regarded as a subgenus of Gervillia.
Hehuachi	HHC10	137	Julian2	Julian	Carnian		Halobia		rugosa	18	5	1	1	19	siliciclastic	Shallow	Guembel, 1861
Hehuachi	HHC10	137	Julian2	Julian	Carnian		Hoernesia	cf.	inflata	6	2	1	2	16	siliciclastic	Shallow	Mansuy, 1919	The holotype is not found. The identification is after Nanking Institute of Geology and Paleontology. 1976
Hehuachi	HHC10	137	Julian2	Julian	Carnian		Homomya		sp.	25	4	1	3	3	siliciclastic	Shallow	Agassiz, 1843
Hehuachi	HHC10	137	Julian2	Julian	Carnian		Leptochondria		sp.	11	2	1	1	4	siliciclastic	Shallow	Bittner, 1891
Hehuachi	HHC10	137	Julian2	Julian	Carnian		Leptochondria		raiblianus	2	2	1	1	4	siliciclastic	Shallow	Márquez-Aliaga, 1983
Hehuachi	HHC10	137	Julian2	Julian	Carnian		Mysidioptera		aeguicostata	1	2	1	1	4	siliciclastic	Shallow	Broili, 1904
Hehuachi	HHC10	137	Julian2	Julian	Carnian		Neoschizodus		laevigatus	4	4	1	3	3	siliciclastic	Shallow	Ziethen, 1830
Hehuachi	HHC10	137	Julian2	Julian	Carnian		Nuculana		timorensis	6	6	2	3	2	siliciclastic	Shallow	Goldfuss, 1837
Hehuachi	HHC10	137	Julian2	Julian	Carnian		Palaeoneilo		elliptica	96	6	2	3	2	siliciclastic	Shallow	Goldfuss, 1837
Hehuachi	HHC10	137	Julian2	Julian	Carnian		Palaeonucula	curtiformis	strigilata	4	6	2	3	2	siliciclastic	Shallow	Gou, 1993
Hehuachi	HHC10	137	Julian2	Julian	Carnian		Pteria		sp.	1	2	1	1	4	siliciclastic	Shallow	Goldfuss, 1837
Hehuachi	HHC10	137	Julian2	Julian	Carnian		Unionites		sp.	8	4	1	3	3	siliciclastic	Shallow	Chen in Gu et al., 1976
Maotai	MG80	40.3	Pelsonian	Pelsonian	Anisian		Asoella		illyrica	2	2	1	1	4	carbonate	Shallow	Hsu, 1940		This species was Eumorphotis (Asoella) illyrica before.
Maotai	MG80	40.3	Pelsonian	Pelsonian	Anisian		Entolium		subdemissum	28	4	1	1	7	carbonate	Shallow		The data is from Regional Geological Survey Brigade of Guizhou Geological Bureau (1976)
Maotai	MG80	40.3	Pelsonian	Pelsonian	Anisian		Costatoria	mansuyi	goldfussi	4	4	1	3	3	carbonate	Shallow		The data is from Regional Geological Survey Brigade of Guizhou Geological Bureau (1976)
Maotai	MG80	40.3	Pelsonian	Pelsonian	Anisian		Costatoria		goldfussi	4	4	1	3	3	carbonate	Shallow		The data is from Regional Geological Survey Brigade of Guizhou Geological Bureau (1976)
Maotai	MG80	40.3	Pelsonian	Pelsonian	Anisian		Asoella		paradoxica	30	2	1	1	4	carbonate	Shallow		The data is from Regional Geological Survey Brigade of Guizhou Geological Bureau (1976)
Maotai	MG80	40.3	Pelsonian	Pelsonian	Anisian		Asoella		subillyrica	3	2	1	1	4	carbonate	Shallow		The data is from Regional Geological Survey Brigade of Guizhou Geological Bureau (1976)
Maotai	MG80	40.3	Pelsonian	Pelsonian	Anisian		Asoella		illyrica	3	2	1	1	4	carbonate	Shallow		The data is from Regional Geological Survey Brigade of Guizhou Geological Bureau (1976)
Maotai	MG80	40.3	Pelsonian	Pelsonian	Anisian		Unionites		spicatus	6	4	1	3	3	carbonate	Shallow		The data is from Regional Geological Survey Brigade of Guizhou Geological Bureau (1976)
Maotai	MG80	40.3	Pelsonian	Pelsonian	Anisian		Pleuromya	strigata	musculoides	5	4	1	4	14	carbonate	Shallow		The data is from Regional Geological Survey Brigade of Guizhou Geological Bureau (1976)
Maotai	MG80	40.3	Pelsonian	Pelsonian	Anisian		Pleuromya		elongata	4	4	1	4	14	carbonate	Shallow		The data is from Regional Geological Survey Brigade of Guizhou Geological Bureau (1976)
Maotai	MG80	40.3	Pelsonian	Pelsonian	Anisian		Asoella	crassistriata	illyrica	3	2	1	1	4	carbonate	Shallow		The data is from Regional Geological Survey Brigade of Guizhou Geological Bureau (1976)
Maotai	MG80	40.3	Pelsonian	Pelsonian	Anisian		Palaeolima		subcostata	3	2	1	1	4	carbonate	Shallow		The data is from Regional Geological Survey Brigade of Guizhou Geological Bureau (1976)
Maotai	MG82	52.6	Pelsonian	Pelsonian	Anisian		Costatoria	mansuyi	goldfussi	47	4	1	3	3	carbonate	Shallow	Loczy, 1899
Maotai	MG82	52.6	Pelsonian	Pelsonian	Anisian		Asoella		illyrica	16	2	1	1	4	carbonate	Shallow	Hsu, 1940
Maotai	MG82	52.6	Pelsonian	Pelsonian	Anisian		Neoschizodus		laevigatus	1	4	1	3	3	carbonate	Shallow	Ziethen, 1830
Maotai	MG82	52.6	Pelsonian	Pelsonian	Anisian		Unionites		sp.	1	4	1	3	3	carbonate	Shallow	Chen in Gu et al., 1976
Maotai	MG82	52.6	Pelsonian	Pelsonian	Anisian		Elegantarca		subareata	6	4	1	1	7	carbonate	Shallow	Chen in Gu et al., 1976
Maotai	MG82	52.6	Pelsonian	Pelsonian	Anisian		Costatoria	mansuyi	goldfussi	24	4	1	3	3	carbonate	Shallow		The data is from Regional Geological Survey Brigade of Guizhou Geological Bureau (1976)
Maotai	MG82	52.6	Pelsonian	Pelsonian	Anisian		Costatoria		goldfussi	28	4	1	3	3	carbonate	Shallow		The data is from Regional Geological Survey Brigade of Guizhou Geological Bureau (1976)
Maotai	MG82	52.6	Pelsonian	Pelsonian	Anisian		Asoella		paradoxica	17	2	1	1	4	carbonate	Shallow		The data is from Regional Geological Survey Brigade of Guizhou Geological Bureau (1976)
Maotai	MG82	52.6	Pelsonian	Pelsonian	Anisian		Asoella		subillyrica	3	2	1	1	4	carbonate	Shallow		The data is from Regional Geological Survey Brigade of Guizhou Geological Bureau (1976)
Maotai	MG82	52.6	Pelsonian	Pelsonian	Anisian		Asoella		illyrica	3	2	1	1	4	carbonate	Shallow		The data is from Regional Geological Survey Brigade of Guizhou Geological Bureau (1976)
Maotai	MG82	52.6	Pelsonian	Pelsonian	Anisian		Unionites		spicatus	16	4	1	3	3	carbonate	Shallow		The data is from Regional Geological Survey Brigade of Guizhou Geological Bureau (1976)
Maotai	MG82	52.6	Pelsonian	Pelsonian	Anisian		Pleuromya	strigata	musculoides	15	4	1	4	14	carbonate	Shallow		The data is from Regional Geological Survey Brigade of Guizhou Geological Bureau (1976)
Maotai	MG82	52.6	Pelsonian	Pelsonian	Anisian		Pleuromya		elongata	17	4	1	4	14	carbonate	Shallow		The data is from Regional Geological Survey Brigade of Guizhou Geological Bureau (1976)
Maotai	MG82	52.6	Pelsonian	Pelsonian	Anisian		Asoella	crassistriata	illyrica	3	2	1	1	4	carbonate	Shallow		The data is from Regional Geological Survey Brigade of Guizhou Geological Bureau (1976)
Maotai	MG82	52.6	Pelsonian	Pelsonian	Anisian		Palaeolima		subcostata	3	2	1	1	4	carbonate	Shallow		The data is from Regional Geological Survey Brigade of Guizhou Geological Bureau (1976)
Maotai	MG83	58.5	Pelsonian	Pelsonian	Anisian		Asoella		illyrica	7	2	1	1	4	carbonate	Shallow	Hsu, 1940
Maotai	MG83	58.5	Pelsonian	Pelsonian	Anisian		Costatoria	mansuyi	goldfussi	6	4	1	3	3	carbonate	Shallow	Loczy, 1899
Maotai	MG83	58.5	Pelsonian	Pelsonian	Anisian		Costatoria	mansuyi	goldfussi	29	4	1	3	3	carbonate	Shallow		The data is from Regional Geological Survey Brigade of Guizhou Geological Bureau (1976)
Maotai	MG83	58.5	Pelsonian	Pelsonian	Anisian		Costatoria		goldfussi	19	4	1	3	3	carbonate	Shallow		The data is from Regional Geological Survey Brigade of Guizhou Geological Bureau (1976)
Maotai	MG83	58.5	Pelsonian	Pelsonian	Anisian		Asoella		paradoxica	11	2	1	1	4	carbonate	Shallow		The data is from Regional Geological Survey Brigade of Guizhou Geological Bureau (1976)
Maotai	MG83	58.5	Pelsonian	Pelsonian	Anisian		Asoella		subillyrica	3	2	1	1	4	carbonate	Shallow		The data is from Regional Geological Survey Brigade of Guizhou Geological Bureau (1976)
Maotai	MG83	58.5	Pelsonian	Pelsonian	Anisian		Asoella		illyrica	3	2	1	1	4	carbonate	Shallow		The data is from Regional Geological Survey Brigade of Guizhou Geological Bureau (1976)
Maotai	MG83	58.5	Pelsonian	Pelsonian	Anisian		Unionites		spicatus	18	4	1	3	3	carbonate	Shallow		The data is from Regional Geological Survey Brigade of Guizhou Geological Bureau (1976)
Maotai	MG83	58.5	Pelsonian	Pelsonian	Anisian		Pleuromya	strigata	musculoides	17	4	1	4	14	carbonate	Shallow		The data is from Regional Geological Survey Brigade of Guizhou Geological Bureau (1976)
Maotai	MG83	58.5	Pelsonian	Pelsonian	Anisian		Pleuromya		elongata	21	4	1	4	14	carbonate	Shallow		The data is from Regional Geological Survey Brigade of Guizhou Geological Bureau (1976)
Maotai	MG83	58.5	Pelsonian	Pelsonian	Anisian		Asoella	crassistriata	illyrica	3	2	1	1	4	carbonate	Shallow		The data is from Regional Geological Survey Brigade of Guizhou Geological Bureau (1976)
Maotai	MG83	58.5	Pelsonian	Pelsonian	Anisian		Palaeolima		subcostata	3	2	1	1	4	carbonate	Shallow		The data is from Regional Geological Survey Brigade of Guizhou Geological Bureau (1976)
Maotai	MG84	72.7	Pelsonian	Pelsonian	Anisian		Costatoria	mansuyi	goldfussi	34	4	1	3	3	carbonate	Shallow	Loczy, 1899
Maotai	MG84	72.7	Pelsonian	Pelsonian	Anisian		Asoella		illyrica	5	2	1	1	4	carbonate	Shallow	Hsu, 1940
Maotai	MG84	72.7	Pelsonian	Pelsonian	Anisian		Costatoria	mansuyi	goldfussi	24	4	1	3	3	carbonate	Shallow		The data is from Regional Geological Survey Brigade of Guizhou Geological Bureau (1976)
Maotai	MG84	72.7	Pelsonian	Pelsonian	Anisian		Costatoria		goldfussi	20	4	1	3	3	carbonate	Shallow		The data is from Regional Geological Survey Brigade of Guizhou Geological Bureau (1976)
Maotai	MG84	72.7	Pelsonian	Pelsonian	Anisian		Asoella		paradoxica	11	2	1	1	4	carbonate	Shallow		The data is from Regional Geological Survey Brigade of Guizhou Geological Bureau (1976)
Maotai	MG84	72.7	Pelsonian	Pelsonian	Anisian		Asoella		subillyrica	3	2	1	1	4	carbonate	Shallow		The data is from Regional Geological Survey Brigade of Guizhou Geological Bureau (1976)
Maotai	MG84	72.7	Pelsonian	Pelsonian	Anisian		Asoella		illyrica	3	2	1	1	4	carbonate	Shallow		The data is from Regional Geological Survey Brigade of Guizhou Geological Bureau (1976)
Maotai	MG84	72.7	Pelsonian	Pelsonian	Anisian		Unionites		spicatus	18	4	1	3	3	carbonate	Shallow		The data is from Regional Geological Survey Brigade of Guizhou Geological Bureau (1976)
Maotai	MG84	72.7	Pelsonian	Pelsonian	Anisian		Pleuromya	strigata	musculoides	21	4	1	4	14	carbonate	Shallow		The data is from Regional Geological Survey Brigade of Guizhou Geological Bureau (1976)
Maotai	MG84	72.7	Pelsonian	Pelsonian	Anisian		Pleuromya		elongata	21	4	1	4	14	carbonate	Shallow		The data is from Regional Geological Survey Brigade of Guizhou Geological Bureau (1976)
Maotai	MG84	72.7	Pelsonian	Pelsonian	Anisian		Asoella	crassistriata	illyrica	3	2	1	1	4	carbonate	Shallow		The data is from Regional Geological Survey Brigade of Guizhou Geological Bureau (1976)
Maotai	MG84	72.7	Pelsonian	Pelsonian	Anisian		Palaeolima		subcostata	3	2	1	1	4	carbonate	Shallow		The data is from Regional Geological Survey Brigade of Guizhou Geological Bureau (1976)
Maotai	MG91	113.9	Pelsonian	Pelsonian	Anisian		Bakevellia	cf.	elegans	2	2	1	2	16	carbonate	Shallow	Schlotheim, 1820
Maotai	MG91	113.9	Pelsonian	Pelsonian	Anisian		Unionites		spicatus	4	4	1	3	3	carbonate	Shallow	Chen in Gu et al., 1976
Maotai	MG91	113.9	Pelsonian	Pelsonian	Anisian		Costatoria	mansuyi	goldfussi	2	4	1	3	3	carbonate	Shallow	Loczy, 1899
Maotai	MG91	113.9	Pelsonian	Pelsonian	Anisian		Costatoria	mansuyi	goldfussi	13	4	1	3	3	carbonate	Shallow		The data is from Regional Geological Survey Brigade of Guizhou Geological Bureau (1976)
Maotai	MG91	113.9	Pelsonian	Pelsonian	Anisian		Costatoria		goldfussi	18	4	1	3	3	carbonate	Shallow		The data is from Regional Geological Survey Brigade of Guizhou Geological Bureau (1976)
Maotai	MG91	113.9	Pelsonian	Pelsonian	Anisian		Asoella		paradoxica	22	2	1	1	4	carbonate	Shallow		The data is from Regional Geological Survey Brigade of Guizhou Geological Bureau (1976)
Maotai	MG91	113.9	Pelsonian	Pelsonian	Anisian		Asoella		subillyrica	12	2	1	1	4	carbonate	Shallow		The data is from Regional Geological Survey Brigade of Guizhou Geological Bureau (1976)
Maotai	MG91	113.9	Pelsonian	Pelsonian	Anisian		Asoella		illyrica	14	2	1	1	4	carbonate	Shallow		The data is from Regional Geological Survey Brigade of Guizhou Geological Bureau (1976)
Maotai	MG91	113.9	Pelsonian	Pelsonian	Anisian		Unionites		spicatus	10	4	1	3	3	carbonate	Shallow		The data is from Regional Geological Survey Brigade of Guizhou Geological Bureau (1976)
Maotai	MG91	113.9	Pelsonian	Pelsonian	Anisian		Pleuromya	strigata	musculoides	30	4	1	4	14	carbonate	Shallow		The data is from Regional Geological Survey Brigade of Guizhou Geological Bureau (1976)
Maotai	MG91	113.9	Pelsonian	Pelsonian	Anisian		Pleuromya		elongata	18	4	1	4	14	carbonate	Shallow		The data is from Regional Geological Survey Brigade of Guizhou Geological Bureau (1976)
Maotai	MG91	113.9	Pelsonian	Pelsonian	Anisian		Asoella	crassistriata	illyrica	13	2	1	1	4	carbonate	Shallow		The data is from Regional Geological Survey Brigade of Guizhou Geological Bureau (1976)
Maotai	MG91	113.9	Pelsonian	Pelsonian	Anisian		Palaeolima		subcostata	7	2	1	1	4	carbonate	Shallow		The data is from Regional Geological Survey Brigade of Guizhou Geological Bureau (1976)
Maotai	MG92	125.5	Pelsonian	Pelsonian	Anisian		Costatoria	mansuyi	goldfussi	8	4	1	3	3	carbonate	Shallow	Loczy, 1899
Maotai	MG92	125.5	Pelsonian	Pelsonian	Anisian		Unionites		spicatus	19	4	1	3	3	carbonate	Shallow	Chen in Gu et al., 1976
Maotai	MG92	125.5	Pelsonian	Pelsonian	Anisian		Asoella		illyrica	4	2	1	1	4	carbonate	Shallow	Hsu, 1940
Maotai	MG92	125.5	Pelsonian	Pelsonian	Anisian		Unionites		sp.	1	4	1	3	3	carbonate	Shallow	Chen in Gu et al., 1976
Maotai	MG92	125.5	Pelsonian	Pelsonian	Anisian		Elegantarca		subareata	1	4	1	1	7	carbonate	Shallow	Chen in Gu et al., 1976
Maotai	MG92	125.5	Pelsonian	Pelsonian	Anisian		Costatoria	mansuyi	goldfussi	7	4	1	3	3	carbonate	Shallow		The data is from Regional Geological Survey Brigade of Guizhou Geological Bureau (1976)
Maotai	MG92	125.5	Pelsonian	Pelsonian	Anisian		Costatoria		goldfussi	18	4	1	3	3	carbonate	Shallow		The data is from Regional Geological Survey Brigade of Guizhou Geological Bureau (1976)
Maotai	MG92	125.5	Pelsonian	Pelsonian	Anisian		Asoella		paradoxica	20	2	1	1	4	carbonate	Shallow		The data is from Regional Geological Survey Brigade of Guizhou Geological Bureau (1976)
Maotai	MG92	125.5	Pelsonian	Pelsonian	Anisian		Asoella		subillyrica	19	2	1	1	4	carbonate	Shallow		The data is from Regional Geological Survey Brigade of Guizhou Geological Bureau (1976)
Maotai	MG92	125.5	Pelsonian	Pelsonian	Anisian		Asoella		illyrica	18	4	1	3	3	carbonate	Shallow		The data is from Regional Geological Survey Brigade of Guizhou Geological Bureau (1976)
Maotai	MG92	125.5	Pelsonian	Pelsonian	Anisian		Unionites		spicatus	3	4	1	3	3	carbonate	Shallow		The data is from Regional Geological Survey Brigade of Guizhou Geological Bureau (1976)
Maotai	MG92	125.5	Pelsonian	Pelsonian	Anisian		Pleuromya	strigata	musculoides	30	4	1	4	14	carbonate	Shallow		The data is from Regional Geological Survey Brigade of Guizhou Geological Bureau (1976)
Maotai	MG92	125.5	Pelsonian	Pelsonian	Anisian		Pleuromya		elongata	10	4	1	4	14	carbonate	Shallow		The data is from Regional Geological Survey Brigade of Guizhou Geological Bureau (1976)
Maotai	MG92	125.5	Pelsonian	Pelsonian	Anisian		Asoella	crassistriata	illyrica	15	2	1	1	4	carbonate	Shallow		The data is from Regional Geological Survey Brigade of Guizhou Geological Bureau (1976)
Maotai	MG92	125.5	Pelsonian	Pelsonian	Anisian		Palaeolima		subcostata	5	2	1	1	4	carbonate	Shallow		The data is from Regional Geological Survey Brigade of Guizhou Geological Bureau (1976)
Maotai	MG92	125.5	Pelsonian	Pelsonian	Anisian		Plagiostoma		radiata	3	2	1	1	4	carbonate	Shallow		The data is from Regional Geological Survey Brigade of Guizhou Geological Bureau (1976)
Maotai	MG92	125.5	Pelsonian	Pelsonian	Anisian		Costatoria	mansuyi	goldfussi	5	4	1	3	3	carbonate	Shallow		The data is from Regional Geological Survey Brigade of Guizhou Geological Bureau (1976)
Maotai	MG92	125.5	Pelsonian	Pelsonian	Anisian		Costatoria		goldfussi	16	4	1	3	3	carbonate	Shallow		The data is from Regional Geological Survey Brigade of Guizhou Geological Bureau (1976)
Maotai	MG92	125.5	Pelsonian	Pelsonian	Anisian		Asoella		paradoxica	13	2	1	1	4	carbonate	Shallow		The data is from Regional Geological Survey Brigade of Guizhou Geological Bureau (1976)
Maotai	MG92	125.5	Pelsonian	Pelsonian	Anisian		Asoella		subillyrica	18	2	1	1	4	carbonate	Shallow		The data is from Regional Geological Survey Brigade of Guizhou Geological Bureau (1976)
Maotai	MG92	125.5	Pelsonian	Pelsonian	Anisian		Asoella		illyrica	17	2	1	1	4	carbonate	Shallow		The data is from Regional Geological Survey Brigade of Guizhou Geological Bureau (1976)
Maotai	MG92	125.5	Pelsonian	Pelsonian	Anisian		Unionites		spicatus	3	4	1	3	3	carbonate	Shallow		The data is from Regional Geological Survey Brigade of Guizhou Geological Bureau (1976)
Maotai	MG92	125.5	Pelsonian	Pelsonian	Anisian		Pleuromya	strigata	musculoides	24	4	1	4	14	carbonate	Shallow		The data is from Regional Geological Survey Brigade of Guizhou Geological Bureau (1976)
Maotai	MG92	125.5	Pelsonian	Pelsonian	Anisian		Pleuromya		elongata	4	4	1	4	14	carbonate	Shallow		The data is from Regional Geological Survey Brigade of Guizhou Geological Bureau (1976)
Maotai	MG92	125.5	Pelsonian	Pelsonian	Anisian		Asoella	crassistriata	illyrica	13	2	1	1	4	carbonate	Shallow		The data is from Regional Geological Survey Brigade of Guizhou Geological Bureau (1976)
Maotai	MG92	125.5	Pelsonian	Pelsonian	Anisian		Palaeolima		subcostata	5	2	1	1	4	carbonate	Shallow		The data is from Regional Geological Survey Brigade of Guizhou Geological Bureau (1976)
Maotai	MG92	125.5	Pelsonian	Pelsonian	Anisian		Plagiostoma		radiata	3	2	1	1	4	carbonate	Shallow		The data is from Regional Geological Survey Brigade of Guizhou Geological Bureau (1976)
Maotai	MG94	142.1	Illyrian	Pelsonian-Illyrian	Anisian		Costatoria	mansuyi	goldfussi	88	4	1	3	3	carbonate	Shallow	Loczy, 1899
Maotai	MG94	142.1	Illyrian	Pelsonian-Illyrian	Anisian		Unionites		spicatus	14	4	1	3	3	carbonate	Shallow	Chen in Gu et al., 1976
Maotai	MG94	142.1	Illyrian	Pelsonian-Illyrian	Anisian		Unionites		sp.	1	4	1	3	3	carbonate	Shallow	Chen in Gu et al., 1976
Maotai	MG94	142.1	Illyrian	Pelsonian-Illyrian	Anisian		Asoella		illyrica	1	2	1	1	4	carbonate	Shallow	Hsu, 1940
Maotai	MG94	142.1	Illyrian	Pelsonian-Illyrian	Anisian		Bositra		sp.	1	1	1	1	12	carbonate	Shallow	De Gregorio, 1886
Maotai	MG98	158.3	Illyrian	Pelsonian-Illyrian	Anisian		Asoella		illyrica	5	2	1	1	4	carbonate	Shallow	Hsu, 1940
Maotai	MG103	252	Illyrian	Pelsonian-Illyrian	Anisian		Unionites		spicatus	10	4	1	3	3	carbonate	Shallow	Chen in Gu et al., 1976
Maotai	MG103	252	Illyrian	Pelsonian-Illyrian	Anisian		Unionites		sp.	8	4	1	3	3	carbonate	Shallow	Chen in Gu et al., 1976
Maotai	MG103	252	Illyrian	Pelsonian-Illyrian	Anisian		Costatoria	mansuyi	goldfussi	1	4	1	3	3	carbonate	Shallow	Loczy, 1899
Maotai	MG107	276.9	Illyrian	Pelsonian-Illyrian	Anisian		Unionites		sp.	7	4	1	3	3	carbonate	Shallow	Chen in Gu et al., 1976
Maotai	MG107	276.9	Illyrian	Pelsonian-Illyrian	Anisian		Unionites		spicatus	17	4	1	3	3	carbonate	Shallow	Chen in Gu et al., 1976
Maotai	MG107	276.9	Illyrian	Pelsonian-Illyrian	Anisian		Elegantarca		subareata	2	2	1	2	16	carbonate	Shallow	Chen in Gu et al., 1976
Maotai	MG109	309.7	Illyrian	Pelsonian-Illyrian	Anisian		Costatoria	mansuyi	goldfussi	2	4	1	3	3	carbonate	Shallow	Loczy, 1899
Maotai	MG109	309.7	Illyrian	Pelsonian-Illyrian	Anisian		Unionites		spicatus	1	4	1	3	3	carbonate	Shallow	Chen in Gu et al., 1976
Maotai	MG109	309.7	Illyrian	Pelsonian-Illyrian	Anisian		Asoella		illyrica	2	2	1	1	4	carbonate	Shallow	Hsu, 1940
Maotai	MG109	309.7	Illyrian	Pelsonian-Illyrian	Anisian		Bositra		sp.	1	1	1	1	12	carbonate	Shallow	De Gregorio, 1886
Maotai	MG117	363.7	Illyrian	Pelsonian-Illyrian	Anisian		Bakevellia	cf.	elegans	1	2	1	2	16	carbonate	Shallow	Schlotheim, 1820
Maotai	MG117	363.7	Illyrian	Pelsonian-Illyrian	Anisian		Promyalina		sp.	1	2	1	1	4	carbonate	Shallow	Bittner, 1899
Gaoqiao	GQ98	444.2	Fassanian	Fassanian	Ladinian		Costatoria		goldfussi	20	4	1	3	3	carbonate	Shallow		To assess the abundance of bivalve specimens in the Maotai and Gaoqiao Section, we referred to the distribution table in the Zunyi Regional Geological Survey Report (1971). Specimen quantities were assigned on a scale from 0 to 30, reflecting their abundance based on the width of bars in the table.
Gaoqiao	GQ98	444.2	Fassanian	Fassanian	Ladinian		Asoella		subillyrica	15	2	1	1	4	carbonate	Shallow		To assess the abundance of bivalve specimens in the Maotai and Gaoqiao Section, we referred to the distribution table in the Zunyi Regional Geological Survey Report (1971). Specimen quantities were assigned on a scale from 0 to 31, reflecting their abundance based on the width of bars in the table.
Gaoqiao	GQ98	444.2	Fassanian	Fassanian	Ladinian		Asoella		illyrica	15	2	1	1	4	carbonate	Shallow		To assess the abundance of bivalve specimens in the Maotai and Gaoqiao Section, we referred to the distribution table in the Zunyi Regional Geological Survey Report (1971). Specimen quantities were assigned on a scale from 0 to 32, reflecting their abundance based on the width of bars in the table.
Gaoqiao	GQ98	444.2	Fassanian	Fassanian	Ladinian		Palaeolima		subcostata	10	2	1	1	4	carbonate	Shallow		To assess the abundance of bivalve specimens in the Maotai and Gaoqiao Section, we referred to the distribution table in the Zunyi Regional Geological Survey Report (1971). Specimen quantities were assigned on a scale from 0 to 33, reflecting their abundance based on the width of bars in the table.
Gaoqiao	GQ98	444.2	Fassanian	Fassanian	Ladinian		Plagiostoma		radiata	27	2	1	1	4	carbonate	Shallow		To assess the abundance of bivalve specimens in the Maotai and Gaoqiao Section, we referred to the distribution table in the Zunyi Regional Geological Survey Report (1971). Specimen quantities were assigned on a scale from 0 to 34, reflecting their abundance based on the width of bars in the table.
Gaoqiao	GQ106	545.7	Fassanian	Fassanian	Ladinian		Costatoria		goldfussi	15	4	1	3	3	carbonate	Shallow		To assess the abundance of bivalve specimens in the Maotai and Gaoqiao Section, we referred to the distribution table in the Zunyi Regional Geological Survey Report (1971). Specimen quantities were assigned on a scale from 0 to 35, reflecting their abundance based on the width of bars in the table.
Gaoqiao	GQ106	545.7	Fassanian	Fassanian	Ladinian		Asoella		subillyrica	3	2	1	1	4	carbonate	Shallow		To assess the abundance of bivalve specimens in the Maotai and Gaoqiao Section, we referred to the distribution table in the Zunyi Regional Geological Survey Report (1971). Specimen quantities were assigned on a scale from 0 to 36, reflecting their abundance based on the width of bars in the table.
Gaoqiao	GQ106	545.7	Fassanian	Fassanian	Ladinian		Asoella		illyrica	3	2	1	1	4	carbonate	Shallow		To assess the abundance of bivalve specimens in the Maotai and Gaoqiao Section, we referred to the distribution table in the Zunyi Regional Geological Survey Report (1971). Specimen quantities were assigned on a scale from 0 to 37, reflecting their abundance based on the width of bars in the table.
Gaoqiao	GQ106	545.7	Fassanian	Fassanian	Ladinian		Palaeolima		subcostata	15	2	1	1	4	carbonate	Shallow		To assess the abundance of bivalve specimens in the Maotai and Gaoqiao Section, we referred to the distribution table in the Zunyi Regional Geological Survey Report (1971). Specimen quantities were assigned on a scale from 0 to 38, reflecting their abundance based on the width of bars in the table.
Gaoqiao	GQ106	545.7	Fassanian	Fassanian	Ladinian		Plagiostoma		radiata	3	2	1	1	4	carbonate	Shallow		To assess the abundance of bivalve specimens in the Maotai and Gaoqiao Section, we referred to the distribution table in the Zunyi Regional Geological Survey Report (1971). Specimen quantities were assigned on a scale from 0 to 39, reflecting their abundance based on the width of bars in the table.
Gaoqiao	GQ109	580.7	Fassanian	Fassanian	Ladinian		Costatoria		goldfussi	10	4	1	3	3	carbonate	Shallow		To assess the abundance of bivalve specimens in the Maotai and Gaoqiao Section, we referred to the distribution table in the Zunyi Regional Geological Survey Report (1971). Specimen quantities were assigned on a scale from 0 to 40, reflecting their abundance based on the width of bars in the table.
Gaoqiao	GQ109	580.7	Fassanian	Fassanian	Ladinian		Asoella		subillyrica	3	2	1	1	4	carbonate	Shallow		To assess the abundance of bivalve specimens in the Maotai and Gaoqiao Section, we referred to the distribution table in the Zunyi Regional Geological Survey Report (1971). Specimen quantities were assigned on a scale from 0 to 41, reflecting their abundance based on the width of bars in the table.
Gaoqiao	GQ109	580.7	Fassanian	Fassanian	Ladinian		Asoella		illyrica	3	2	1	1	4	carbonate	Shallow		To assess the abundance of bivalve specimens in the Maotai and Gaoqiao Section, we referred to the distribution table in the Zunyi Regional Geological Survey Report (1971). Specimen quantities were assigned on a scale from 0 to 42, reflecting their abundance based on the width of bars in the table.
Gaoqiao	GQ109	580.7	Fassanian	Fassanian	Ladinian		Palaeolima		subcostata	30	2	1	1	4	carbonate	Shallow		To assess the abundance of bivalve specimens in the Maotai and Gaoqiao Section, we referred to the distribution table in the Zunyi Regional Geological Survey Report (1971). Specimen quantities were assigned on a scale from 0 to 43, reflecting their abundance based on the width of bars in the table.
Gaoqiao	GQ109	580.7	Fassanian	Fassanian	Ladinian		Plagiostoma		radiata	3	2	1	1	4	carbonate	Shallow		To assess the abundance of bivalve specimens in the Maotai and Gaoqiao Section, we referred to the distribution table in the Zunyi Regional Geological Survey Report (1971). Specimen quantities were assigned on a scale from 0 to 44, reflecting their abundance based on the width of bars in the table.
Gaoqiao	GQ109	580.7	Fassanian	Fassanian	Ladinian		Palaeolima		praecepidecline	27	2	1	1	4	carbonate	Shallow		To assess the abundance of bivalve specimens in the Maotai and Gaoqiao Section, we referred to the distribution table in the Zunyi Regional Geological Survey Report (1971). Specimen quantities were assigned on a scale from 0 to 45, reflecting their abundance based on the width of bars in the table.
Gaoqiao	GQ112	619.3	Fassanian	Fassanian	Ladinian		Costatoria		goldfussi	3	4	1	3	3	carbonate	Shallow		To assess the abundance of bivalve specimens in the Maotai and Gaoqiao Section, we referred to the distribution table in the Zunyi Regional Geological Survey Report (1971). Specimen quantities were assigned on a scale from 0 to 46, reflecting their abundance based on the width of bars in the table.
Gaoqiao	GQ112	619.3	Fassanian	Fassanian	Ladinian		Asoella		subillyrica	3	2	1	1	4	carbonate	Shallow		To assess the abundance of bivalve specimens in the Maotai and Gaoqiao Section, we referred to the distribution table in the Zunyi Regional Geological Survey Report (1971). Specimen quantities were assigned on a scale from 0 to 47, reflecting their abundance based on the width of bars in the table.
Gaoqiao	GQ112	619.3	Fassanian	Fassanian	Ladinian		Asoella		illyrica	3	2	1	1	4	carbonate	Shallow		To assess the abundance of bivalve specimens in the Maotai and Gaoqiao Section, we referred to the distribution table in the Zunyi Regional Geological Survey Report (1971). Specimen quantities were assigned on a scale from 0 to 48, reflecting their abundance based on the width of bars in the table.
Gaoqiao	GQ112	619.3	Fassanian	Fassanian	Ladinian		Palaeolima		subcostata	3	2	1	1	4	carbonate	Shallow		To assess the abundance of bivalve specimens in the Maotai and Gaoqiao Section, we referred to the distribution table in the Zunyi Regional Geological Survey Report (1971). Specimen quantities were assigned on a scale from 0 to 49, reflecting their abundance based on the width of bars in the table.
Gaoqiao	GQ112	619.3	Fassanian	Fassanian	Ladinian		Palaeolima		praecepidecline	3	2	1	1	4	carbonate	Shallow		To assess the abundance of bivalve specimens in the Maotai and Gaoqiao Section, we referred to the distribution table in the Zunyi Regional Geological Survey Report (1971). Specimen quantities were assigned on a scale from 0 to 50, reflecting their abundance based on the width of bars in the table.

## Sheet: references
Key to Ecology (modified from Bambach et al. 2007: table 1; Aberhan and Kiessling, 2015)
	Category	Remarks
Mobility level
Non-motile, unattached	1	Free-lying, boring
Non-motile, attached with byssus	2	Byssate
Non-motile, attached, cemented	3	Cemented
Facultative, unattached	4	Moving when necessary, e.g. intermittent swimming or adjusting position within sediment
Facultative, attached	5	Moving when necessary, e.g. intermittent swimming of byssate taxa
Regularly moving	6	Moving slowly, maintaining intimate contact with substrate
Feeding mechanism
Suspension feeding	1
Deposit feeding (mining)	2
Surface deposit feeding	3
Herbivore / grazing	5
Carnivore / predatory	6
Chemosymbiosis	9
Tiering
Epifaunal	1
Semi-infaunal	2
Shallow infaunal	3
Deep infaunal	4
Main Sources for Ecological Categorizations
Aberhan M (1994) Guild-structure and evolution of Mesozoic benthic shelf communities. Palaios 9:516–545.
Aberhan M, et al. (2004) Ecological attributes of marine invertebrates. PaleoDB (www.paleobiodb.org).
Aberhan M, Kiessling W. 2015. Persistent ecological shifts in marine molluscan assemblages across the end-Cretaceous mass extinction. Proceedings of the National Academy of Sciences 112:7207–7212.
Bambach RK, Bush AM, Erwin DH (2007) Autecology and the filling of ecospace: key metazoan radiations. Palaeontology 50:1–22.
Del Piero N, Rigaud S, Takahashi S, et al. Unravelling the paleoecology of flat clams: New insights from an Upper Triassic halobiid bivalve[J]. Global and Planetary Change, 2020, 190: 103195.
Foster WJ, Twitchett RJ. 2014. Functional diversity of marine ecosystems after the Late Permian mass extinction event. Nature Geosci:22.
Foster et al. (2017) A silicified Early Triassic marine assemblage from Svalbard.
Hautmann M, Smith AB, Mcgowan AJ, Bucher H., 2013. Bivalves from the Olenekian (Early Triassic) of southwestern Utah: systematics and evolutionary significance. Journal of Systematic Palaeontology 11, 263–293.
Hofmann R, Hautmann M, Bucher H. 2015. Recovery dynamics of benthic marine communities from the Lower Triassic Werfen Formation, northern Italy. LETHAIA 48:474–496.
Komatsu, T., Chen, J-H., Cao, M-Z., Stiller, F and Naruse, H. Middle Triassic (Anisian) diversified bivalves: depositional environments and bivalve assemblages in the Leidapo Member of the Qingyan Formation, southern China.Palaeogeography, Palaeoclimatology, Palaeoecology 208, 207-223 (2004).
Mondal, S., & Harries, P. J. (2016). Phanerozoic trends in ecospace utilization: the bivalve perspective. Earth-Science Reviews, 152, 106-118.
Neogene Marine biota of Tropical America (NMITA) molluscan life habits database (http://eusmilia.geology.uiowa.edu/nmita.htm).
Queirós AM, et al. (2013) A bioturbation classification of European marine infaunal invertebrates. Ecol Evol 3:3958–3985.
Ros S, De Renzi M, Damborenea S, Marquez-Aliaga A. 2011. Coping between crises: Early Triassic-early Jurassic bivalve diversity dynamics. PALAEOGEOGRAPHY PALAEOCLIMATOLOGY PALAEOECOLOGY 311:184–199. DOI: 10.1016/j.palaeo.2011.08.020.
Ros-Franch, S., Márquez-Aliaga, A., & Damborenea, S. E. (2014). Comprehensive database on Induan (Lower Triassic) to Sinemurian (Lower Jurassic) marine bivalve genera and their paleobiogeographic record. Paleontological contributions, 2014(8), 1-219.
Posenato, R. Patterns of bivalve biodiversity from Early to Middle Triassic in the Southern Alps (Italy): regional vs. global events. Palaeogeography, Palaeoclimatology, Palaeoecology 261, 145-159 (2008).
Schubert, J.K. and Bottjer, D.J. Aftermath of the Permian-Triassic mass extinction event: Paleoecology of Lower Triassic carbonates in the western USA.
Stanley SM (1970) Relation of shell form to life habits in the Bivalvia (Mollusca).The Geological Society of America Memoir 125:1–296.
Taxonomic Reference
Agassiz, J. L. R. 1840–1845. Études Critiques zur les Mollusques Fossiles(contenant les Trigonies & les Myes du Jura et de la Craie Suisses).Published by the author. Neuchatel. 4 livr., Livr. 1, Memoire sur lesTrigonies: 1–58, 11 pl. Livr. 2–4, Monographie des Myes: 1–287, 94 pl.
Biakov AS and Kutygin RV. 2021. First record of the Genus Unionites Wissmann (Bivalvia) in the Boreal Permian of northeast Russia. Paleontological Journal 55:372-377
Bittner A.1899. Himálayan Fossils. Part 2. Trias Brachiopoda and Lamellibranchiata. Palaeontologia Indica, Series 15. 3(2): 1-76.
Bittner, Alexander. 1901. Lamellibranchiaten aus der Trias von Hudiklanecnächst Loitsch in Krain. Jahrbuch der Kaiserlich-Königlichen Geolo-gischen Reichsanstalt, Wien 51(2):225–234.
Broili, Ferdinand. 1904. Die Fauna Pachycardientuffe der Seiser Alp (mitAusschluss der Gastropoden und Cephalopoden). Palaeontographica50(4–5):145–227.
Cox, Leslie R., N. D. Newell, C. C. Branson, R. Casey, André Chavan, A.H. Coogan, Colette Dechaseaux, C. A. Fleming, F. Haas, L. G. Hertlein,A. M. Keen, A. LaRocque, A. L. McAlester, B. F. Perkins, H. S. Puri, L.A. Smith, T. Soot-Ryen, H. B. Stenzel, R. D. Turner, & J. Weir. 1969.Systematic Descriptions. In R. C. Moore, ed., Treatise on InvertebratePaleontology, Part N, Mollusca 6, Bivalvia, vol…
De Gregorio, Antonio. 1886. Monographie des fossiles de Valpore (MontGrappa) du sous-horizon Grappin de Greg. Annales de Géologie et dePaléontologie 2:1–20.
Étallon, Auguste. 1862. Études paléontologiques sur les terrains juras-siques du Haut-Jura. Monographie de l'étage Corallien. 2ième partie.Mémoires de la Société d'Émulation du Département du Doubs (3)6:53–241. Besançon.
Foster, W. J., Danise, S., & Twitchett, R. J. (2017). A silicified Early Triassic marine assemblage from Svalbard. Journal of Systematic Palaeontology, 15(10), 851-877.
Goldfuss, G. A. 1833–1841. Petrefacta Germaniae tam ea, quae in MuseoUniversitatis Regiae Borussicae Fridericiae Wilhelmiae Rhenanae Ser-vantur quam alia Quaecunquae in Museis Hoenighusiano MuensterianoAliisque Extant, Iconibus et Descriptionibus Illustrata. Abbildungen und Beschreibungen der Petrefacten Deutschlands und der Angrenzender Länder unter Mitwirkung des Herrn Grafen Georg zu Münster…
Gou Zong-hai. 1993. Bivalve fauna of Upper Triassic in Maantang area,Jiangyou, Sichuan. Acta Palaeontologica Sinica 32(1):13–30. In Chinesewith English abstract.
Gu Z, Huang B, Chen C, Wen S, Ma Q, Lan X, Xu J, Liu L, Wang S, Wang D, Qiu R, Huang Z, Zhang Z, Chen J, Wu P. 1976. Chinese Fossils of All Groups: Fossil Lamellibranchia of China. China: Science Press, 52p., 21pl.
Guizhou Bureau of Geology and Mineral Resources.1987. Regional geology of Guizhou Province: People's Republic of China, Ministry of Geology and Mineral Resources, Geological Memoirs, ser. 1, no. 7, 700 p., Geologic map 1:500,000 (in Chinese with English summary).
Guizhou Bureau of Geology and Mineral Resources. 1997. Stratigraphy (lithostratigraphic) of Guizhou Province. Wuhan: China University of Geosciences Press, 306 p. (in Chinese).
Gümbel, C. W. 1861. Geognostische Beschreibung des bayerischen Al-pengebirges und seines Vorlandes. Verlag von Justus Perthes. Gotha. 950 p., 42 pl.
Hauer F. 1850. Ueber die vom Herrn Bergrath W.fuchs in den Venetianer Alpen gesammelten Fossilien. Harvard: Aus der K.K.Hof-und Staatsdruckerei.
Hautmann M, Bucher H, Brühwiler T, Goudemand N, Kaim A, Nützel A. 2011. An unusually diverse mollusc fauna from the earliest Triassic of South China and its implications for benthic recovery after the end-Permian biotic crisis. Geobios, 44(1), 71-85. DOI: 10.1016/j.geobios.2010.07.004.
Hautmann M, Smith AB, Mcgowan AJ, Bucher H., 2013. Bivalves from the Olenekian (Early Triassic) of southwestern Utah: systematics and evolutionary significance. Journal of Systematic Palaeontology 11, 263–293.
Hsü D. 1940. On the Occurrence of an Anisic Fauna in the Tunglan District, Kwangsi. Bulletin of the Geological Society of China 20(2):173-177.
Huang Y, 2014. Extinction and Recovery of Bivalves during the Permian–Triassic Transition. China university of Geosciences.
Huang Y, Tong J, Fraiser ML. 2018. A Griesbachian (Early Triassic) mollusc fauna from the Sidazhai Section, Southwest China, with paleoecological insights on the proliferation of genus Claraia (Bivalvia). Journal of Earth Science, 29: 794-805.
Mansuy H. E'tude Geologique du Yunnan Oriental. 2e Partie, Paleontologie. Mémoires du Service Géologique de l'Indochine, 1, 146 pp.
Márquez-Aliaga, Ana. 1983. Aportación a sistemática de los bivalvos triásicos.COL-PA (Coloquios de Paleontología), Publicaciones del Departamentode Paleontología, Universidad Complutense 38:33–47.
Mietto P, Andreetta R, Broglio Loriga C, Buratti N, Cirilli S, De Zanche V, Furin S, Gianolla P, Manfrin S, Muttoni G, Neri C, Nicora A, Posenato R., Preto N, Righi G, Spötl C. 2007. A candidate of the Global Boundary Stratotype Section and Point for the base of the Carnian Stage (Upper Triassic): GSSP at the base of the canadensis Subzone (FAD of Daxatina) in the Prati di Stuores/Stuores Wiesen …
Patte E. 1935. Fossils paleozoiques et mesodu Sud-Ouest de la Chine. Palaeontologia Sinica Series B 15, 1–50.
Sha J, Grant‐Mackie JA. 1996. Late Permian to Miocene bivalve assemblages from Hohxil, Qinghai‐Xizang Plateau, China. Journal of the Royal Society of New Zealand 26(4): 429-455. DOI: 10.1080/03014223.1996.9517519.
Song T, Tong J, Tian L, Chu D, Huang Y. 2019. Taxonomic and ecological variations of Permian-Triassic transitional bivalve communities from the littoral clastic facies in southwestern China. Palaeogeography, Palaeoclimatology, Palaeoecology 519, 108-123.
Tong J, Yin H. 2002. The lower triassic of South China. Journal of Asian Earth Sciences 20(7): 803-815. DOI: 10.1016/S1367-9120(01)00058-X.
Wirth, E. 1936. Beiträge zur Kenntnis der Trias in der Provinz Szechuan,West-China. Neues Jahrbuch für Mineralogie, Geologie und Paläontolo-gie, Abhandlungen B 75:412–445.
Wissmann HL, Münster G. 1841. Beiträge zur Geognosie und Petrefactenkunde des südöstlichen Tirols vorzüglich der Schichten St. Cassian. Beiträge zur Petrefacten-Kunde 4:1-152.
Wittenburg, P. von. 1909. Einige Lamellibranchiata der Salt-Range, mit Berücksichtigung der Lamellibranchiata des Süd-Ussuri-Gebiets. Neues Jahrbuch für Mineralogie, Geologie und Paläontologie. 1909: 6-13.
Xiong XQ, Huang YF, Tong JN. 2010. Triassic bivalve biostratigraphic sequence in Zunyi, Guizhou Province. Geological Science and Technology Information, 29(6): 7-14 (in Chinese with English abstract).
Yang SR, Wang XP, Hao WC. 1986. Early Triassic bivalve assemblage of western Guangxi (in Chinese with English abstract).
ZIETEN, C. H. v. (1830) . Die Versteinerungen Württembergs oder naturgetreue Abbildungen der in den vollständigsten Sammlungen, namentlich der in dem Kabinet des Oberamts
