# Supplementary material for: Taxonomic and ecologic transitions in Triassic marine bivalve communities
Source: PeerJ. 2025 May 9;13:e19237. doi: 10.7717/peerj.19237 (PMC12068250; doi:10.7717/peerj.19237)
Supplement: Supplemental Information 4 — A modified version of the Paleobiology Database (PBDB) and genus-level taxonomy and ecology for Triassic bivalves. [file peerj-13-19237-s004.xlsx]

## Sheet: Data
accepted_name	order	family	genus	abund_value	early_interval	late_interval	max_ma	min_ma	motility	diet	life_habit	n.mot	n.di	n.lh	mol	stg	reference_no
Grammatodon	Arcida	Parallelodontidae	Grammatodon		Toarcian		182.7	174.1	stationary, attached	suspension feeder	epifaunal	2	1	1	4	62	313
Camptonectes	Pectinida	Pectinidae	Camptonectes		Toarcian		182.7	174.1	stationary, attached	suspension feeder	low-level epifaunal	2	1	1	4	62	313
Oxytoma	Pectinida	Oxytomidae	Oxytoma		Toarcian		182.7	174.1	facultatively mobile, attached	suspension feeder	epifaunal	5	1	1	19	62	313
Inoceramus	Myalinida	Inoceramidae	Inoceramus		Toarcian		182.7	174.1	facultatively mobile	suspension feeder	epifaunal	4	1	1	7	62	313
Anisocardia	Veneroidei	Arcticidae	Anisocardia	2	Sinemurian		199.3	190.8	facultatively mobile	suspension feeder	infaunal	4	1	3	3	60	487
Bakevellia (Neobakevellia) pintadae	Ostreida	Bakevelliidae	Bakevellia (Neobakevellia)	5	Sinemurian		199.3	190.8	stationary	suspension feeder	semi-infaunal	2	1	2	16	60	487
Entolium (Entolium) corneolum	Pectinida	Entoliidae	Entolium (Entolium)	4	Sinemurian		199.3	190.8	facultatively mobile	suspension feeder	epifaunal	4	1	1	7	60	487
Exogyra	Ostreida	Gryphaeidae	Exogyra	2	Sinemurian		199.3	190.8	stationary, attached	suspension feeder	epifaunal	2	1	1	4	60	487
Gervillia	Ostreida	Bakevelliidae	Gervillia	12	Sinemurian		199.3	190.8	stationary, attached	suspension feeder	semi-infaunal	2	1	2	16	60	487
Lucina	Lucinida	Lucinidae	Lucina	3	Sinemurian		199.3	190.8	facultatively mobile	chemosymbiotic	deep infaunal	4	9	3	11	60	487
Mesomiltha	Lucinida	Lucinidae	Mesomiltha	2	Sinemurian		199.3	190.8	facultatively mobile	chemosymbiotic, suspension feeder	infaunal	4	9	3	11	60	487
Modiolus (Modiolus) imbricatus	Mytilida	Mytilidae	Modiolus (Modiolus)	4	Sinemurian		199.3	190.8	stationary, attached, epibiont	suspension feeder	semi-infaunal	2	1	2	16	60	487
Modiolus	Mytilida	Mytilidae	Modiolus	3	Sinemurian		199.3	190.8	stationary, attached, epibiont	suspension feeder	semi-infaunal	2	1	2	16	60	487
Parallelodon	Arcida	Parallelodontidae	Parallelodon	16	Sinemurian		199.3	190.8	stationary, attached	suspension feeder	epifaunal	2	1	1	4	60	487
Pholadomya	Pholadomyida	Pholadomyidae	Pholadomya	7	Sinemurian		199.3	190.8	facultatively mobile	suspension feeder	deep infaunal	4	1	4	14	60	487
Pseudotrapezium	Veneroidei	Arcticidae	Pseudotrapezium	1	Sinemurian		199.3	190.8	facultatively mobile	suspension feeder	infaunal	4	1	3	3	60	487
Quenstedtia	Cardiida	Quenstedtiidae	Quenstedtia	2	Sinemurian		199.3	190.8	facultatively mobile	deposit feeder	infaunal	4	2	3	10	60	487
Trigonia	Trigoniida	Trigoniidae	Trigonia	1	Sinemurian		199.3	190.8	facultatively mobile	suspension feeder	infaunal	4	1	3	3	60	487
Weyla alata	Pectinida	Neitheidae	Weyla	10	Sinemurian		199.3	190.8	stationary, unattached	suspension feeder	semi-infaunal	1	1	2	20	60	487
Aguilerella	Ostreida	Bakevelliidae	Aguilerella	2	Sinemurian		199.3	190.8	stationary, attached, epibiont	suspension feeder	epifaunal	2	1	1	4	60	487
Bakevellia (Neobakevellia) pintadae	Ostreida	Bakevelliidae	Bakevellia (Neobakevellia)	11	Sinemurian		199.3	190.8	stationary	suspension feeder	semi-infaunal	2	1	2	16	60	487
Entolium (Entolium) corneolum	Pectinida	Entoliidae	Entolium (Entolium)	5	Sinemurian		199.3	190.8	facultatively mobile	suspension feeder	epifaunal	4	1	1	7	60	487
Gervillia	Ostreida	Bakevelliidae	Gervillia	69	Sinemurian		199.3	190.8	stationary, attached	suspension feeder	semi-infaunal	2	1	2	16	60	487
Lucina	Lucinida	Lucinidae	Lucina	7	Sinemurian		199.3	190.8	facultatively mobile	chemosymbiotic	deep infaunal	4	9	3	11	60	487
Mesomiltha	Lucinida	Lucinidae	Mesomiltha	3	Sinemurian		199.3	190.8	facultatively mobile	chemosymbiotic, suspension feeder	infaunal	4	9	3	11	60	487
Modiolus (Modiolus) imbricatus	Mytilida	Mytilidae	Modiolus (Modiolus)	5	Sinemurian		199.3	190.8	stationary, attached, epibiont	suspension feeder	semi-infaunal	2	1	2	16	60	487
Modiolus	Mytilida	Mytilidae	Modiolus	3	Sinemurian		199.3	190.8	stationary, attached, epibiont	suspension feeder	semi-infaunal	2	1	2	16	60	487
Parallelodon	Arcida	Parallelodontidae	Parallelodon	5	Sinemurian		199.3	190.8	stationary, attached	suspension feeder	epifaunal	2	1	1	4	60	487
Pteroperna	Ostreida	Pteriidae	Pteroperna	1	Sinemurian		199.3	190.8	stationary, attached, epibiont	suspension feeder	epifaunal	2	1	1	4	60	487
Quenstedtia	Cardiida	Quenstedtiidae	Quenstedtia	2	Sinemurian		199.3	190.8	facultatively mobile	deposit feeder	infaunal	4	2	3	10	60	487
Weyla alata	Pectinida	Neitheidae	Weyla	3	Sinemurian		199.3	190.8	stationary, unattached	suspension feeder	semi-infaunal	1	1	2	20	60	487
Bakevellia (Neobakevellia) pintadae	Ostreida	Bakevelliidae	Bakevellia (Neobakevellia)	5	Sinemurian		199.3	190.8	stationary	suspension feeder	semi-infaunal	2	1	2	16	60	487
Camptonectes (Camptonectes) auritus	Pectinida	Pectinidae	Camptonectes (Camptonectes)	1	Sinemurian		199.3	190.8	stationary, attached	suspension feeder	low-level epifaunal	2	1	1	4	60	487
Entolium (Entolium) corneolum	Pectinida	Entoliidae	Entolium (Entolium)	1	Sinemurian		199.3	190.8	facultatively mobile	suspension feeder	epifaunal	4	1	1	7	60	487
Gervillia	Ostreida	Bakevelliidae	Gervillia	41	Sinemurian		199.3	190.8	stationary, attached	suspension feeder	semi-infaunal	2	1	2	16	60	487
Mesomiltha	Lucinida	Lucinidae	Mesomiltha	2	Sinemurian		199.3	190.8	facultatively mobile	chemosymbiotic, suspension feeder	infaunal	4	9	3	11	60	487
Modiolus (Modiolus) imbricatus	Mytilida	Mytilidae	Modiolus (Modiolus)	3	Sinemurian		199.3	190.8	stationary, attached, epibiont	suspension feeder	semi-infaunal	2	1	2	16	60	487
Modiolus	Mytilida	Mytilidae	Modiolus	4	Sinemurian		199.3	190.8	stationary, attached, epibiont	suspension feeder	semi-infaunal	2	1	2	16	60	487
Parallelodon	Arcida	Parallelodontidae	Parallelodon	40	Sinemurian		199.3	190.8	stationary, attached	suspension feeder	epifaunal	2	1	1	4	60	487
Protocardia	Cardiida	Cardiidae	Protocardia	1	Sinemurian		199.3	190.8	facultatively mobile	suspension feeder	infaunal	4	1	3	3	60	487
Pseudolimea duplicata	Pectinida	Limidae	Pseudolimea	1	Sinemurian		199.3	190.8	stationary, attached	suspension feeder	low-level epifaunal	2	1	1	4	60	487
Weyla alata	Pectinida	Neitheidae	Weyla	1	Sinemurian		199.3	190.8	stationary, unattached	suspension feeder	semi-infaunal	1	1	2	20	60	487
Bakevellia (Neobakevellia) pintadae	Ostreida	Bakevelliidae	Bakevellia (Neobakevellia)	29	Sinemurian		199.3	190.8	stationary	suspension feeder	semi-infaunal	2	1	2	16	60	487
Entolium (Entolium) corneolum	Pectinida	Entoliidae	Entolium (Entolium)	4	Sinemurian		199.3	190.8	facultatively mobile	suspension feeder	epifaunal	4	1	1	7	60	487
Gervillia	Ostreida	Bakevelliidae	Gervillia	27	Sinemurian		199.3	190.8	stationary, attached	suspension feeder	semi-infaunal	2	1	2	16	60	487
Modiolus (Modiolus) imbricatus	Mytilida	Mytilidae	Modiolus (Modiolus)	10	Sinemurian		199.3	190.8	stationary, attached, epibiont	suspension feeder	semi-infaunal	2	1	2	16	60	487
Modiolus	Mytilida	Mytilidae	Modiolus	6	Sinemurian		199.3	190.8	stationary, attached, epibiont	suspension feeder	semi-infaunal	2	1	2	16	60	487
Parallelodon	Arcida	Parallelodontidae	Parallelodon	42	Sinemurian		199.3	190.8	stationary, attached	suspension feeder	epifaunal	2	1	1	4	60	487
Plagiostoma	Pectinida	Limidae	Plagiostoma	2	Sinemurian		199.3	190.8	stationary, attached	suspension feeder	low-level epifaunal	2	1	1	4	60	487
Weyla alata	Pectinida	Neitheidae	Weyla	1	Sinemurian		199.3	190.8	stationary, unattached	suspension feeder	semi-infaunal	1	1	2	20	60	487
Bakevellia (Neobakevellia) pintadae	Ostreida	Bakevelliidae	Bakevellia (Neobakevellia)	6	Sinemurian		199.3	190.8	stationary	suspension feeder	semi-infaunal	2	1	2	16	60	487
Entolium (Entolium) corneolum	Pectinida	Entoliidae	Entolium (Entolium)	3	Sinemurian		199.3	190.8	facultatively mobile	suspension feeder	epifaunal	4	1	1	7	60	487
Gervillia	Ostreida	Bakevelliidae	Gervillia	6	Sinemurian		199.3	190.8	stationary, attached	suspension feeder	semi-infaunal	2	1	2	16	60	487
Lopha costata	Ostreida	Ostreidae	Lopha	2	Sinemurian		199.3	190.8	cemented	suspension feeder	epifaunal	3	1	1	1	60	487
Modiolus (Modiolus) imbricatus	Mytilida	Mytilidae	Modiolus (Modiolus)	2	Sinemurian		199.3	190.8	stationary, attached, epibiont	suspension feeder	semi-infaunal	2	1	2	16	60	487
Modiolus	Mytilida	Mytilidae	Modiolus	2	Sinemurian		199.3	190.8	stationary, attached, epibiont	suspension feeder	semi-infaunal	2	1	2	16	60	487
Parallelodon	Arcida	Parallelodontidae	Parallelodon	8	Sinemurian		199.3	190.8	stationary, attached	suspension feeder	epifaunal	2	1	1	4	60	487
Pseudopecten equivalvis	Pectinida	Pectinidae	Pseudopecten	3	Sinemurian		199.3	190.8	facultatively mobile, unattached	suspension feeder	low-level epifaunal	4	1	1	7	60	487
Anisocardia	Veneroidei	Arcticidae	Anisocardia	2	Sinemurian		199.3	190.8	facultatively mobile	suspension feeder	infaunal	4	1	3	3	60	487
Bakevellia (Neobakevellia) pintadae	Ostreida	Bakevelliidae	Bakevellia (Neobakevellia)	1	Sinemurian		199.3	190.8	stationary	suspension feeder	semi-infaunal	2	1	2	16	60	487
Cercomya	Pandorida	Laternulidae	Cercomya	2	Sinemurian		199.3	190.8	facultatively mobile	suspension feeder	deep infaunal	4	1	4	14	60	487
Chlamys textoria	Pectinida	Pectinidae	Chlamys	1	Sinemurian		199.3	190.8	facultatively mobile, unattached	suspension feeder	epifaunal	4	1	1	7	60	487
Cucullaea	Arcida	Cucullaeidae	Cucullaea	1	Sinemurian		199.3	190.8	facultatively mobile	suspension feeder	infaunal	4	1	3	3	60	487
Entolium (Entolium) corneolum	Pectinida	Entoliidae	Entolium (Entolium)	1	Sinemurian		199.3	190.8	facultatively mobile	suspension feeder	epifaunal	4	1	1	7	60	487
Gervillia	Ostreida	Bakevelliidae	Gervillia	7	Sinemurian		199.3	190.8	stationary, attached	suspension feeder	semi-infaunal	2	1	2	16	60	487
Lopha costata	Ostreida	Ostreidae	Lopha	42	Sinemurian		199.3	190.8	cemented	suspension feeder	epifaunal	3	1	1	1	60	487
Modiolus (Modiolus) imbricatus	Mytilida	Mytilidae	Modiolus (Modiolus)	21	Sinemurian		199.3	190.8	stationary, attached, epibiont	suspension feeder	semi-infaunal	2	1	2	16	60	487
Modiolus	Mytilida	Mytilidae	Modiolus	12	Sinemurian		199.3	190.8	stationary, attached, epibiont	suspension feeder	semi-infaunal	2	1	2	16	60	487
Parallelodon	Arcida	Parallelodontidae	Parallelodon	33	Sinemurian		199.3	190.8	stationary, attached	suspension feeder	epifaunal	2	1	1	4	60	487
Placunopsis radiata	Pectinida	Anomiidae	Placunopsis	1	Sinemurian		199.3	190.8	stationary, attached	suspension feeder	epifaunal, gregarious	2	1	1	4	60	487
Plagiostoma	Pectinida	Limidae	Plagiostoma	103	Sinemurian		199.3	190.8	stationary, attached	suspension feeder	low-level epifaunal	2	1	1	4	60	487
Pseudolimea duplicata	Pectinida	Limidae	Pseudolimea	1	Sinemurian		199.3	190.8	stationary, attached	suspension feeder	low-level epifaunal	2	1	1	4	60	487
Quenstedtia	Cardiida	Quenstedtiidae	Quenstedtia	1	Sinemurian		199.3	190.8	facultatively mobile	deposit feeder	infaunal	4	2	3	10	60	487
Unicardium	Lucinida	Mactromyidae	Unicardium	5	Sinemurian		199.3	190.8	facultatively mobile, attached	suspension feeder	shallow infaunal	5	1	3	5	60	487
Anisocardia	Veneroidei	Arcticidae	Anisocardia	11	Sinemurian		199.3	190.8	facultatively mobile	suspension feeder	infaunal	4	1	3	3	60	487
Entolium (Entolium) corneolum	Pectinida	Entoliidae	Entolium (Entolium)	48	Sinemurian		199.3	190.8	facultatively mobile	suspension feeder	epifaunal	4	1	1	7	60	487
Gervillia	Ostreida	Bakevelliidae	Gervillia	2	Sinemurian		199.3	190.8	stationary, attached	suspension feeder	semi-infaunal	2	1	2	16	60	487
Modiolus (Modiolus) imbricatus	Mytilida	Mytilidae	Modiolus (Modiolus)	1	Sinemurian		199.3	190.8	stationary, attached, epibiont	suspension feeder	semi-infaunal	2	1	2	16	60	487
Pholadomya	Pholadomyida	Pholadomyidae	Pholadomya	2	Sinemurian		199.3	190.8	facultatively mobile	suspension feeder	deep infaunal	4	1	4	14	60	487
Pinna	Ostreida	Pinnidae	Pinna		Sinemurian		199.3	190.8	stationary, attached	suspension feeder	semi-infaunal	2	1	2	16	60	487
Plagiostoma	Pectinida	Limidae	Plagiostoma	7	Sinemurian		199.3	190.8	stationary, attached	suspension feeder	low-level epifaunal	2	1	1	4	60	487
Weyla alata	Pectinida	Neitheidae	Weyla	8	Sinemurian		199.3	190.8	stationary, unattached	suspension feeder	semi-infaunal	1	1	2	20	60	487
Entolium (Entolium) corneolum	Pectinida	Entoliidae	Entolium (Entolium)	1	Sinemurian		199.3	190.8	facultatively mobile	suspension feeder	epifaunal	4	1	1	7	60	487
Lopha costata	Ostreida	Ostreidae	Lopha	2	Sinemurian		199.3	190.8	cemented	suspension feeder	epifaunal	3	1	1	1	60	487
Modiolus (Modiolus) imbricatus	Mytilida	Mytilidae	Modiolus (Modiolus)	13	Sinemurian		199.3	190.8	stationary, attached, epibiont	suspension feeder	semi-infaunal	2	1	2	16	60	487
Modiolus	Mytilida	Mytilidae	Modiolus	13	Sinemurian		199.3	190.8	stationary, attached, epibiont	suspension feeder	semi-infaunal	2	1	2	16	60	487
Parallelodon	Arcida	Parallelodontidae	Parallelodon	1	Sinemurian		199.3	190.8	stationary, attached	suspension feeder	epifaunal	2	1	1	4	60	487
Plagiostoma	Pectinida	Limidae	Plagiostoma	1	Sinemurian		199.3	190.8	stationary, attached	suspension feeder	low-level epifaunal	2	1	1	4	60	487
Plicatula	Pectinida	Plicatulidae	Plicatula	9	Sinemurian		199.3	190.8	stationary, attached, epibiont	suspension feeder	epifaunal	2	1	1	4	60	487
Protocardia	Cardiida	Cardiidae	Protocardia	3	Sinemurian		199.3	190.8	facultatively mobile	suspension feeder	infaunal	4	1	3	3	60	487
Weyla alata	Pectinida	Neitheidae	Weyla	2	Sinemurian		199.3	190.8	stationary, unattached	suspension feeder	semi-infaunal	1	1	2	20	60	487
Anisocardia	Veneroidei	Arcticidae	Anisocardia	24	Sinemurian		199.3	190.8	facultatively mobile	suspension feeder	infaunal	4	1	3	3	60	487
Gervilleioperna	Ostreida	Malleidae	Gervilleioperna	1	Sinemurian		199.3	190.8	stationary, attached	suspension feeder	epifaunal	2	1	1	4	60	487
Gervillia	Ostreida	Bakevelliidae	Gervillia	2	Sinemurian		199.3	190.8	stationary, attached	suspension feeder	semi-infaunal	2	1	2	16	60	487
Modiolus (Modiolus) imbricatus	Mytilida	Mytilidae	Modiolus (Modiolus)	10	Sinemurian		199.3	190.8	stationary, attached, epibiont	suspension feeder	semi-infaunal	2	1	2	16	60	487
Pholadomya	Pholadomyida	Pholadomyidae	Pholadomya	5	Sinemurian		199.3	190.8	facultatively mobile	suspension feeder	deep infaunal	4	1	4	14	60	487
Pleuromya uniformis	Pholadida	Pleuromyidae	Pleuromya	10	Sinemurian		199.3	190.8	facultatively mobile	suspension feeder	deep infaunal	4	1	4	14	60	487
Plicatula	Pectinida	Plicatulidae	Plicatula	1	Sinemurian		199.3	190.8	stationary, attached, epibiont	suspension feeder	epifaunal	2	1	1	4	60	487
Protocardia	Cardiida	Cardiidae	Protocardia	30	Sinemurian		199.3	190.8	facultatively mobile	suspension feeder	infaunal	4	1	3	3	60	487
Anisocardia	Veneroidei	Arcticidae	Anisocardia	29	Sinemurian		199.3	190.8	facultatively mobile	suspension feeder	infaunal	4	1	3	3	60	487
Modiolus (Modiolus) imbricatus	Mytilida	Mytilidae	Modiolus (Modiolus)	5	Sinemurian		199.3	190.8	stationary, attached, epibiont	suspension feeder	semi-infaunal	2	1	2	16	60	487
Modiolus	Mytilida	Mytilidae	Modiolus	2	Sinemurian		199.3	190.8	stationary, attached, epibiont	suspension feeder	semi-infaunal	2	1	2	16	60	487
Parallelodon	Arcida	Parallelodontidae	Parallelodon	1	Sinemurian		199.3	190.8	stationary, attached	suspension feeder	epifaunal	2	1	1	4	60	487
Pholadomya	Pholadomyida	Pholadomyidae	Pholadomya	1	Sinemurian		199.3	190.8	facultatively mobile	suspension feeder	deep infaunal	4	1	4	14	60	487
Plagiostoma	Pectinida	Limidae	Plagiostoma	1	Sinemurian		199.3	190.8	stationary, attached	suspension feeder	low-level epifaunal	2	1	1	4	60	487
Protocardia	Cardiida	Cardiidae	Protocardia	5	Sinemurian		199.3	190.8	facultatively mobile	suspension feeder	infaunal	4	1	3	3	60	487
Pseudolimea duplicata	Pectinida	Limidae	Pseudolimea	1	Sinemurian		199.3	190.8	stationary, attached	suspension feeder	low-level epifaunal	2	1	1	4	60	487
Weyla alata	Pectinida	Neitheidae	Weyla	7	Sinemurian		199.3	190.8	stationary, unattached	suspension feeder	semi-infaunal	1	1	2	20	60	487
Anisocardia	Veneroidei	Arcticidae	Anisocardia	27	Sinemurian		199.3	190.8	facultatively mobile	suspension feeder	infaunal	4	1	3	3	60	487
Bakevellia (Neobakevellia) pintadae	Ostreida	Bakevelliidae	Bakevellia (Neobakevellia)	1	Sinemurian		199.3	190.8	stationary	suspension feeder	semi-infaunal	2	1	2	16	60	487
Cercomya	Pandorida	Laternulidae	Cercomya	1	Sinemurian		199.3	190.8	facultatively mobile	suspension feeder	deep infaunal	4	1	4	14	60	487
Exogyra	Ostreida	Gryphaeidae	Exogyra	2	Sinemurian		199.3	190.8	stationary, attached	suspension feeder	epifaunal	2	1	1	4	60	487
Modiolus (Modiolus) imbricatus	Mytilida	Mytilidae	Modiolus (Modiolus)	25	Sinemurian		199.3	190.8	stationary, attached, epibiont	suspension feeder	semi-infaunal	2	1	2	16	60	487
Pholadomya	Pholadomyida	Pholadomyidae	Pholadomya	1	Sinemurian		199.3	190.8	facultatively mobile	suspension feeder	deep infaunal	4	1	4	14	60	487
Pleuromya uniformis	Pholadida	Pleuromyidae	Pleuromya	10	Sinemurian		199.3	190.8	facultatively mobile	suspension feeder	deep infaunal	4	1	4	14	60	487
Protocardia	Cardiida	Cardiidae	Protocardia	59	Sinemurian		199.3	190.8	facultatively mobile	suspension feeder	infaunal	4	1	3	3	60	487
Pseudotrapezium	Veneroidei	Arcticidae	Pseudotrapezium	1	Sinemurian		199.3	190.8	facultatively mobile	suspension feeder	infaunal	4	1	3	3	60	487
Cercomya undulata	Pandorida	Laternulidae	Cercomya	12	Pliensbachian		190.8	182.7	facultatively mobile	suspension feeder	deep infaunal	4	1	4	14	61	487
Ctenostreon rugosum	Pectinida	Limidae	Ctenostreon	4	Pliensbachian		190.8	182.7	stationary, attached	suspension feeder	low-level epifaunal	2	1	1	4	61	487
Gervillia	Ostreida	Bakevelliidae	Gervillia	1	Pliensbachian		190.8	182.7	stationary, attached	suspension feeder	semi-infaunal	2	1	2	16	61	487
Gresslya peregrina	Pholadida	Ceratomyidae	Gresslya	102	Pliensbachian		190.8	182.7	facultatively mobile, unattached	suspension feeder	deep infaunal	4	1	4	14	61	487
Gryphaea	Ostreida	Gryphaeidae	Gryphaea	4	Pliensbachian		190.8	182.7	stationary, unattached	suspension feeder	epifaunal	1	1	1	12	61	487
Cavilucina (Mesomiltha) bellona	Lucinida	Lucinidae	Cavilucina (Mesomiltha)	10	Pliensbachian		190.8	182.7	facultatively mobile	chemosymbiotic	deep infaunal	4	9	4	11	61	487
Mesomiltha	Lucinida	Lucinidae	Mesomiltha	1	Pliensbachian		190.8	182.7	facultatively mobile	chemosymbiotic, suspension feeder	infaunal	4	9	3	11	61	487
Modiolus gerthi	Mytilida	Mytilidae	Modiolus	2	Pliensbachian		190.8	182.7	stationary, attached, epibiont	suspension feeder	semi-infaunal	2	1	2	16	61	487
Modiolus (Modiolus) imbricatus	Mytilida	Mytilidae	Modiolus (Modiolus)	6	Pliensbachian		190.8	182.7	stationary, attached, epibiont	suspension feeder	semi-infaunal	2	1	2	16	61	487
Pholadomya (Pholadomya) fidicula	Pholadomyida	Pholadomyidae	Pholadomya (Pholadomya)	68	Pliensbachian		190.8	182.7	facultatively mobile	suspension feeder	deep infaunal	4	1	4	14	61	487
Pleuromya uniformis	Pholadida	Pleuromyidae	Pleuromya	77	Pliensbachian		190.8	182.7	facultatively mobile	suspension feeder	deep infaunal	4	1	4	14	61	487
Protocardia striatula	Cardiida	Cardiidae	Protocardia	1	Pliensbachian		190.8	182.7	facultatively mobile	suspension feeder	infaunal	4	1	3	3	61	487
Vaugonia	Trigoniida	Myophorellidae	Vaugonia	3	Pliensbachian		190.8	182.7	facultatively mobile	suspension feeder	infaunal	4	1	3	3	61	487
Astarte	Carditida	Astartidae	Astarte	1	Pliensbachian		190.8	182.7	slow motile	suspension feeder	shallow infaunal	6	1	3	17	61	487
Cercomya undulata	Pandorida	Laternulidae	Cercomya	8	Pliensbachian		190.8	182.7	facultatively mobile	suspension feeder	deep infaunal	4	1	4	14	61	487
Chlamys textoria	Pectinida	Pectinidae	Chlamys	3	Pliensbachian		190.8	182.7	facultatively mobile, unattached	suspension feeder	epifaunal	4	1	1	7	61	487
Ctenostreon proboscideum	Pectinida	Limidae	Ctenostreon	4	Pliensbachian		190.8	182.7	stationary, attached	suspension feeder	low-level epifaunal	2	1	1	4	61	487
Ctenostreon rugosum	Pectinida	Limidae	Ctenostreon	1	Pliensbachian		190.8	182.7	stationary, attached	suspension feeder	low-level epifaunal	2	1	1	4	61	487
Entolium (Entolium) corneolum	Pectinida	Entoliidae	Entolium (Entolium)	6	Pliensbachian		190.8	182.7	facultatively mobile	suspension feeder	epifaunal	4	1	1	7	61	487
Eopecten	Pectinida	Pectinidae	Eopecten	8	Pliensbachian		190.8	182.7	stationary, attached	suspension feeder	low-level epifaunal	2	1	1	4	61	487
Goniomya	Pholadomyida	Pholadomyidae	Goniomya	5	Pliensbachian		190.8	182.7	facultatively mobile	suspension feeder	deep infaunal	4	1	4	14	61	487
Gresslya peregrina	Pholadida	Ceratomyidae	Gresslya	19	Pliensbachian		190.8	182.7	facultatively mobile	suspension feeder	deep infaunal	4	1	4	14	61	487
Gervilleioperna (Gervilleignoma) aurita	Ostreida	Malleidae	Gervilleioperna (Gervilleignoma)	1	Pliensbachian		190.8	182.7	stationary, attached	suspension feeder	epifaunal	2	1	1	4	61	44750
Quadratojaworskiella pustulata	Trigoniida	Laevitrigoniidae	Quadratojaworskiella	1	Pliensbachian		190.8	182.7	facultatively mobile	suspension feeder	infaunal	4	1	3	3	61	487
Actinostreon gregareum	Ostreida	Palaeolophidae	Actinostreon	8	Pliensbachian		190.8	182.7	cemented	suspension feeder	epifaunal	3	1	1	1	61	487
Cavilucina (Mesomiltha) bellona	Lucinida	Lucinidae	Cavilucina (Mesomiltha)	9	Pliensbachian		190.8	182.7	facultatively mobile	chemosymbiotic	deep infaunal	4	9	4	11	61	487
Modiolus (Modiolus) imbricatus	Mytilida	Mytilidae	Modiolus (Modiolus)	2	Pliensbachian		190.8	182.7	stationary, attached, epibiont	suspension feeder	semi-infaunal	2	1	2	16	61	487
Myoconcha neuquena	Cardiida	Kalenteridae	Myoconcha	1	Pliensbachian		190.8	182.7	stationary, attached	suspension feeder	semi-infaunal	2	1	2	16	61	487
Pholadomya (Pholadomya) fidicula	Pholadomyida	Pholadomyidae	Pholadomya (Pholadomya)	20	Pliensbachian		190.8	182.7	facultatively mobile	suspension feeder	deep infaunal	4	1	4	14	61	487
Pinna folium	Ostreida	Pinnidae	Pinna	2	Pliensbachian		190.8	182.7	stationary, attached	suspension feeder	semi-infaunal	2	1	2	16	61	487
Plagiostoma	Pectinida	Limidae	Plagiostoma	2	Pliensbachian		190.8	182.7	stationary, attached	suspension feeder	low-level epifaunal	2	1	1	4	61	487
Pleuromya uniformis	Pholadida	Pleuromyidae	Pleuromya	7	Pliensbachian		190.8	182.7	facultatively mobile	suspension feeder	deep infaunal	4	1	4	14	61	487
Protocardia striatula	Cardiida	Cardiidae	Protocardia	2	Pliensbachian		190.8	182.7	facultatively mobile	suspension feeder	infaunal	4	1	3	3	61	487
Pseudolimea duplicata	Pectinida	Limidae	Pseudolimea	1	Pliensbachian		190.8	182.7	stationary, attached	suspension feeder	low-level epifaunal	2	1	1	4	61	487
Trigonia	Trigoniida	Trigoniidae	Trigonia	5	Pliensbachian		190.8	182.7	facultatively mobile	suspension feeder	infaunal	4	1	3	3	61	487
Vaugonia	Trigoniida	Myophorellidae	Vaugonia	7	Pliensbachian		190.8	182.7	facultatively mobile	suspension feeder	infaunal	4	1	3	3	61	487
Chlamys textoria	Pectinida	Pectinidae	Chlamys	7	Pliensbachian		190.8	182.7	facultatively mobile, unattached	suspension feeder	epifaunal	4	1	1	7	61	487
Ctenostreon rugosum	Pectinida	Limidae	Ctenostreon	2	Pliensbachian		190.8	182.7	stationary, attached	suspension feeder	low-level epifaunal	2	1	1	4	61	487
Entolium (Entolium) corneolum	Pectinida	Entoliidae	Entolium (Entolium)	1	Pliensbachian		190.8	182.7	facultatively mobile	suspension feeder	epifaunal	4	1	1	7	61	487
Gryphaea	Ostreida	Gryphaeidae	Gryphaea	4	Pliensbachian		190.8	182.7	stationary, unattached	suspension feeder	epifaunal	1	1	1	12	61	487
Modiolus (Modiolus) imbricatus	Mytilida	Mytilidae	Modiolus (Modiolus)	3	Pliensbachian		190.8	182.7	stationary, attached, epibiont	suspension feeder	semi-infaunal	2	1	2	16	61	487
Modiolus (Modiolus) scalprum	Mytilida	Mytilidae	Modiolus (Modiolus)	1	Pliensbachian		190.8	182.7	stationary, attached, epibiont	suspension feeder	semi-infaunal	2	1	2	16	61	487
Pachymya (Pachymya) rotundocaudata	Pholadomyida	Pholadomyidae	Pachymya (Pachymya)	14	Pliensbachian		190.8	182.7	facultatively mobile	suspension feeder	deep infaunal	4	1	4	14	61	487
Parallelodon	Arcida	Parallelodontidae	Parallelodon	2	Pliensbachian		190.8	182.7	stationary, attached	suspension feeder	epifaunal	2	1	1	4	61	487
Pholadomya	Pholadomyida	Pholadomyidae	Pholadomya	2	Pliensbachian		190.8	182.7	facultatively mobile	suspension feeder	deep infaunal	4	1	4	14	61	487
Pholadomya (Pholadomya) corrugata	Pholadomyida	Pholadomyidae	Pholadomya (Pholadomya)	3	Pliensbachian		190.8	182.7	facultatively mobile	suspension feeder	deep infaunal	4	1	4	14	61	487
Pholadomya (Pholadomya) fidicula	Pholadomyida	Pholadomyidae	Pholadomya (Pholadomya)	6	Pliensbachian		190.8	182.7	facultatively mobile	suspension feeder	deep infaunal	4	1	4	14	61	487
Pinna	Ostreida	Pinnidae	Pinna	1	Pliensbachian		190.8	182.7	stationary, attached	suspension feeder	semi-infaunal	2	1	2	16	61	487
Plagiostoma	Pectinida	Limidae	Plagiostoma	4	Pliensbachian		190.8	182.7	stationary, attached	suspension feeder	low-level epifaunal	2	1	1	4	61	487
Pleuromya uniformis	Pholadida	Pleuromyidae	Pleuromya	15	Pliensbachian		190.8	182.7	facultatively mobile	suspension feeder	deep infaunal	4	1	4	14	61	487
Plicatula	Pectinida	Plicatulidae	Plicatula	2	Pliensbachian		190.8	182.7	stationary, attached, epibiont	suspension feeder	epifaunal	2	1	1	4	61	487
Protocardia striatula	Cardiida	Cardiidae	Protocardia	3	Pliensbachian		190.8	182.7	facultatively mobile	suspension feeder	infaunal	4	1	3	3	61	487
Pseudotrapezium	Veneroidei	Arcticidae	Pseudotrapezium	6	Pliensbachian		190.8	182.7	facultatively mobile	suspension feeder	infaunal	4	1	3	3	61	487
Trigonia	Trigoniida	Trigoniidae	Trigonia	9	Pliensbachian		190.8	182.7	facultatively mobile	suspension feeder	infaunal	4	1	3	3	61	487
Unicardium	Lucinida	Mactromyidae	Unicardium	1	Pliensbachian		190.8	182.7	facultatively mobile, attached	suspension feeder	shallow infaunal	5	1	3	5	61	487
Weyla alata	Pectinida	Neitheidae	Weyla	8	Pliensbachian		190.8	182.7	stationary, unattached	suspension feeder	semi-infaunal	1	1	2	20	61	487
Weyla titan	Pectinida	Neitheidae	Weyla	1	Pliensbachian		190.8	182.7	stationary, unattached	suspension feeder	semi-infaunal	1	1	2	20	61	487
Chlamys textoria	Pectinida	Pectinidae	Chlamys	3	Pliensbachian		190.8	182.7	facultatively mobile, unattached	suspension feeder	epifaunal	4	1	1	7	61	487
Ctenostreon rugosum	Pectinida	Limidae	Ctenostreon	2	Pliensbachian		190.8	182.7	stationary, attached	suspension feeder	low-level epifaunal	2	1	1	4	61	487
Gryphaea	Ostreida	Gryphaeidae	Gryphaea	12	Pliensbachian		190.8	182.7	stationary, unattached	suspension feeder	epifaunal	1	1	1	12	61	487
Lopha	Ostreida	Ostreidae	Lopha	1	Pliensbachian		190.8	182.7	cemented	suspension feeder	epifaunal	3	1	1	1	61	487
Cavilucina (Mesomiltha) bellona	Lucinida	Lucinidae	Cavilucina (Mesomiltha)	3	Pliensbachian		190.8	182.7	facultatively mobile	chemosymbiotic	deep infaunal	4	9	4	11	61	487
Modiolus (Modiolus) imbricatus	Mytilida	Mytilidae	Modiolus (Modiolus)	1	Pliensbachian		190.8	182.7	stationary, attached, epibiont	suspension feeder	semi-infaunal	2	1	2	16	61	487
Myoconcha neuquena	Cardiida	Kalenteridae	Myoconcha	2	Pliensbachian		190.8	182.7	stationary, attached	suspension feeder	semi-infaunal	2	1	2	16	61	487
Pachymya (Pachymya) rotundocaudata	Pholadomyida	Pholadomyidae	Pachymya (Pachymya)	17	Pliensbachian		190.8	182.7	facultatively mobile	suspension feeder	deep infaunal	4	1	4	14	61	487
Parallelodon	Arcida	Parallelodontidae	Parallelodon	1	Pliensbachian		190.8	182.7	stationary, attached	suspension feeder	epifaunal	2	1	1	4	61	487
Pholadomya (Pholadomya) fidicula	Pholadomyida	Pholadomyidae	Pholadomya (Pholadomya)	6	Pliensbachian		190.8	182.7	facultatively mobile	suspension feeder	deep infaunal	4	1	4	14	61	487
Pinna	Ostreida	Pinnidae	Pinna	4	Pliensbachian		190.8	182.7	stationary, attached	suspension feeder	semi-infaunal	2	1	2	16	61	487
Plagiostoma	Pectinida	Limidae	Plagiostoma	2	Pliensbachian		190.8	182.7	stationary, attached	suspension feeder	low-level epifaunal	2	1	1	4	61	487
Pleuromya uniformis	Pholadida	Pleuromyidae	Pleuromya	6	Pliensbachian		190.8	182.7	facultatively mobile	suspension feeder	deep infaunal	4	1	4	14	61	487
Plicatula	Pectinida	Plicatulidae	Plicatula	1	Pliensbachian		190.8	182.7	stationary, attached, epibiont	suspension feeder	epifaunal	2	1	1	4	61	487
Protocardia striatula	Cardiida	Cardiidae	Protocardia	8	Pliensbachian		190.8	182.7	facultatively mobile	suspension feeder	infaunal	4	1	3	3	61	487
Pseudotrapezium	Veneroidei	Arcticidae	Pseudotrapezium	6	Pliensbachian		190.8	182.7	facultatively mobile	suspension feeder	infaunal	4	1	3	3	61	487
Trigonia	Trigoniida	Trigoniidae	Trigonia	1	Pliensbachian		190.8	182.7	facultatively mobile	suspension feeder	infaunal	4	1	3	3	61	487
Weyla alata	Pectinida	Neitheidae	Weyla	12	Pliensbachian		190.8	182.7	stationary, unattached	suspension feeder	semi-infaunal	1	1	2	20	61	487
Weyla titan	Pectinida	Neitheidae	Weyla	2	Pliensbachian		190.8	182.7	stationary, unattached	suspension feeder	semi-infaunal	1	1	2	20	61	487
Weyla (Lywea) unca	Pectinida	Neitheidae	Weyla (Lywea)	4	Pliensbachian		190.8	182.7	stationary, unattached	suspension feeder	semi-infaunal	1	1	2	20	61	487
Ctenostreon rugosum	Pectinida	Limidae	Ctenostreon	2	Pliensbachian		190.8	182.7	stationary, attached	suspension feeder	low-level epifaunal	2	1	1	4	61	487
Eopecten	Pectinida	Pectinidae	Eopecten	1	Pliensbachian		190.8	182.7	stationary, attached	suspension feeder	low-level epifaunal	2	1	1	4	61	487
Lopha	Ostreida	Ostreidae	Lopha	1	Pliensbachian		190.8	182.7	cemented	suspension feeder	epifaunal	3	1	1	1	61	487
Cavilucina (Mesomiltha) bellona	Lucinida	Lucinidae	Cavilucina (Mesomiltha)	1	Pliensbachian		190.8	182.7	facultatively mobile	chemosymbiotic	deep infaunal	4	9	4	11	61	487
Myophorella (Myophorella) araucana	Trigoniida	Myophorellidae	Myophorella (Myophorella)	1	Pliensbachian		190.8	182.7	facultatively mobile	suspension feeder	infaunal	4	1	3	3	61	487
Pachymya (Pachymya) rotundocaudata	Pholadomyida	Pholadomyidae	Pachymya (Pachymya)	17	Pliensbachian		190.8	182.7	facultatively mobile	suspension feeder	deep infaunal	4	1	4	14	61	487
Pholadomya	Pholadomyida	Pholadomyidae	Pholadomya	4	Pliensbachian		190.8	182.7	facultatively mobile	suspension feeder	deep infaunal	4	1	4	14	61	487
Pholadomya (Pholadomya) corrugata	Pholadomyida	Pholadomyidae	Pholadomya (Pholadomya)	6	Pliensbachian		190.8	182.7	facultatively mobile	suspension feeder	deep infaunal	4	1	4	14	61	487
Pinna	Ostreida	Pinnidae	Pinna	8	Pliensbachian		190.8	182.7	stationary, attached	suspension feeder	semi-infaunal	2	1	2	16	61	487
Plagiostoma	Pectinida	Limidae	Plagiostoma	1	Pliensbachian		190.8	182.7	stationary, attached	suspension feeder	low-level epifaunal	2	1	1	4	61	487
Pleuromya uniformis	Pholadida	Pleuromyidae	Pleuromya	33	Pliensbachian		190.8	182.7	facultatively mobile	suspension feeder	deep infaunal	4	1	4	14	61	487
Pseudotrapezium	Veneroidei	Arcticidae	Pseudotrapezium	2	Pliensbachian		190.8	182.7	facultatively mobile	suspension feeder	infaunal	4	1	3	3	61	487
Weyla alata	Pectinida	Neitheidae	Weyla	6	Pliensbachian		190.8	182.7	stationary, unattached	suspension feeder	semi-infaunal	1	1	2	20	61	487
Weyla (Lywea) unca	Pectinida	Neitheidae	Weyla (Lywea)	1	Pliensbachian		190.8	182.7	stationary, unattached	suspension feeder	semi-infaunal	1	1	2	20	61	487
Astarte	Carditida	Astartidae	Astarte	1	Toarcian		182.7	174.1	slow motile	suspension feeder	shallow infaunal	6	1	3	17	62	487
Cercomya undulata	Pandorida	Laternulidae	Cercomya	1	Toarcian		182.7	174.1	facultatively mobile	suspension feeder	deep infaunal	4	1	4	14	62	487
Gresslya peregrina	Pholadida	Ceratomyidae	Gresslya	42	Toarcian		182.7	174.1	facultatively mobile	suspension feeder	deep infaunal	4	1	4	14	62	487
Gryphaea	Ostreida	Gryphaeidae	Gryphaea	2	Toarcian		182.7	174.1	stationary, unattached	suspension feeder	epifaunal	1	1	1	12	62	487
Cavilucina (Mesomiltha) bellona	Lucinida	Lucinidae	Cavilucina (Mesomiltha)	1	Toarcian		182.7	174.1	facultatively mobile	chemosymbiotic	deep infaunal	4	9	4	11	62	487
Modiolus gerthi	Mytilida	Mytilidae	Modiolus	2	Toarcian		182.7	174.1	stationary, attached, epibiont	suspension feeder	semi-infaunal	2	1	2	16	62	487
Modiolus (Modiolus) imbricatus	Mytilida	Mytilidae	Modiolus (Modiolus)	12	Toarcian		182.7	174.1	stationary, attached, epibiont	suspension feeder	semi-infaunal	2	1	2	16	62	487
Pholadomya (Pholadomya) fidicula	Pholadomyida	Pholadomyidae	Pholadomya (Pholadomya)	28	Toarcian		182.7	174.1	facultatively mobile	suspension feeder	deep infaunal	4	1	4	14	62	487
Pinna folium	Ostreida	Pinnidae	Pinna	6	Toarcian		182.7	174.1	stationary, attached	suspension feeder	semi-infaunal	2	1	2	16	62	487
Plagiostoma	Pectinida	Limidae	Plagiostoma	2	Toarcian		182.7	174.1	stationary, attached	suspension feeder	low-level epifaunal	2	1	1	4	62	487
Pleuromya uniformis	Pholadida	Pleuromyidae	Pleuromya	39	Toarcian		182.7	174.1	facultatively mobile	suspension feeder	deep infaunal	4	1	4	14	62	487
Protocardia striatula	Cardiida	Cardiidae	Protocardia	1	Toarcian		182.7	174.1	facultatively mobile	suspension feeder	infaunal	4	1	3	3	62	487
Vaugonia	Trigoniida	Myophorellidae	Vaugonia	3	Toarcian		182.7	174.1	facultatively mobile	suspension feeder	infaunal	4	1	3	3	62	487
Anisocardia	Veneroidei	Arcticidae	Anisocardia	8	Sinemurian		199.3	190.8	facultatively mobile	suspension feeder	infaunal	4	1	3	3	60	487
Bakevellia (Neobakevellia) pintadae	Ostreida	Bakevelliidae	Bakevellia (Neobakevellia)	1	Sinemurian		199.3	190.8	stationary	suspension feeder	semi-infaunal	2	1	2	16	60	487
Entolium (Entolium) corneolum	Pectinida	Entoliidae	Entolium (Entolium)	16	Sinemurian		199.3	190.8	facultatively mobile	suspension feeder	epifaunal	4	1	1	7	60	487
Gervillia	Ostreida	Bakevelliidae	Gervillia	9	Sinemurian		199.3	190.8	stationary, attached	suspension feeder	semi-infaunal	2	1	2	16	60	487
Modiolus (Modiolus) imbricatus	Mytilida	Mytilidae	Modiolus (Modiolus)	1	Sinemurian		199.3	190.8	stationary, attached, epibiont	suspension feeder	semi-infaunal	2	1	2	16	60	487
Plagiostoma	Pectinida	Limidae	Plagiostoma	5	Sinemurian		199.3	190.8	stationary, attached	suspension feeder	low-level epifaunal	2	1	1	4	60	487
Pleuromya uniformis	Pholadida	Pleuromyidae	Pleuromya	4	Sinemurian		199.3	190.8	facultatively mobile	suspension feeder	deep infaunal	4	1	4	14	60	487
Trigonia	Trigoniida	Trigoniidae	Trigonia	5	Sinemurian		199.3	190.8	facultatively mobile	suspension feeder	infaunal	4	1	3	3	60	487
Weyla alata	Pectinida	Neitheidae	Weyla	6	Sinemurian		199.3	190.8	stationary, unattached	suspension feeder	semi-infaunal	1	1	2	20	60	487
Anisocardia	Veneroidei	Arcticidae	Anisocardia	4	Sinemurian		199.3	190.8	facultatively mobile	suspension feeder	infaunal	4	1	3	3	60	487
Corbicellopsis	Cardiida	Tancrediidae	Corbicellopsis	2	Sinemurian		199.3	190.8	facultatively mobile	deposit feeder	deep infaunal	4	2	4	10	60	487
Entolium (Entolium) corneolum	Pectinida	Entoliidae	Entolium (Entolium)	14	Sinemurian		199.3	190.8	facultatively mobile	suspension feeder	epifaunal	4	1	1	7	60	487
Lucina	Lucinida	Lucinidae	Lucina	1	Sinemurian		199.3	190.8	facultatively mobile	chemosymbiotic	deep infaunal	4	9	3	11	60	487
Modiolus (Modiolus) imbricatus	Mytilida	Mytilidae	Modiolus (Modiolus)	22	Sinemurian		199.3	190.8	stationary, attached, epibiont	suspension feeder	semi-infaunal	2	1	2	16	60	487
Modiolus	Mytilida	Mytilidae	Modiolus	1	Sinemurian		199.3	190.8	stationary, attached, epibiont	suspension feeder	semi-infaunal	2	1	2	16	60	487
Osteomya dilata	Pholadomyida	Pholadomyidae	Osteomya	2	Sinemurian		199.3	190.8	facultatively motile, unattached;	suspension feeder	shallow infaunal	4	1	3	3	60	487
Pholadomya	Pholadomyida	Pholadomyidae	Pholadomya	7	Sinemurian		199.3	190.8	facultatively mobile	suspension feeder	deep infaunal	4	1	4	14	60	487
Pleuromya uniformis	Pholadida	Pleuromyidae	Pleuromya	2	Sinemurian		199.3	190.8	facultatively mobile	suspension feeder	deep infaunal	4	1	4	14	60	487
Protocardia	Cardiida	Cardiidae	Protocardia	28	Sinemurian		199.3	190.8	facultatively mobile	suspension feeder	infaunal	4	1	3	3	60	487
Pseudolimea duplicata	Pectinida	Limidae	Pseudolimea	1	Sinemurian		199.3	190.8	stationary, attached	suspension feeder	low-level epifaunal	2	1	1	4	60	487
Pseudotrapezium	Veneroidei	Arcticidae	Pseudotrapezium	1	Sinemurian		199.3	190.8	facultatively mobile	suspension feeder	infaunal	4	1	3	3	60	487
Weyla alata	Pectinida	Neitheidae	Weyla	1	Sinemurian		199.3	190.8	stationary, unattached	suspension feeder	semi-infaunal	1	1	2	20	60	487
Entolium (Entolium) corneolum	Pectinida	Entoliidae	Entolium (Entolium)	3	Sinemurian		199.3	190.8	facultatively mobile	suspension feeder	epifaunal	4	1	1	7	60	487
Isognomon	Ostreida	Malleidae	Isognomon	1	Sinemurian		199.3	190.8	stationary, attached	suspension feeder	epifaunal	2	1	1	4	60	487
Lucina	Lucinida	Lucinidae	Lucina	4	Sinemurian		199.3	190.8	facultatively mobile	chemosymbiotic	deep infaunal	4	9	3	11	60	487
Modiolus (Modiolus) imbricatus	Mytilida	Mytilidae	Modiolus (Modiolus)	6	Sinemurian		199.3	190.8	stationary, attached, epibiont	suspension feeder	semi-infaunal	2	1	2	16	60	487
Modiolus	Mytilida	Mytilidae	Modiolus	1	Sinemurian		199.3	190.8	stationary, attached, epibiont	suspension feeder	semi-infaunal	2	1	2	16	60	487
Parallelodon	Arcida	Parallelodontidae	Parallelodon	12	Sinemurian		199.3	190.8	stationary, attached	suspension feeder	epifaunal	2	1	1	4	60	487
Pholadomya	Pholadomyida	Pholadomyidae	Pholadomya	2	Sinemurian		199.3	190.8	facultatively mobile	suspension feeder	deep infaunal	4	1	4	14	60	487
Protocardia	Cardiida	Cardiidae	Protocardia	5	Sinemurian		199.3	190.8	facultatively mobile	suspension feeder	infaunal	4	1	3	3	60	487
Anisocardia	Veneroidei	Arcticidae	Anisocardia		Sinemurian		199.3	190.8	facultatively mobile	suspension feeder	infaunal	4	1	3	3	60	487
Bakevellia (Neobakevellia) pintadae	Ostreida	Bakevelliidae	Bakevellia (Neobakevellia)	1	Sinemurian		199.3	190.8	stationary	suspension feeder	semi-infaunal	2	1	2	16	60	487
Entolium (Entolium) corneolum	Pectinida	Entoliidae	Entolium (Entolium)	1	Sinemurian		199.3	190.8	facultatively mobile	suspension feeder	epifaunal	4	1	1	7	60	487
Gervillia	Ostreida	Bakevelliidae	Gervillia	11	Sinemurian		199.3	190.8	stationary, attached	suspension feeder	semi-infaunal	2	1	2	16	60	487
Gryphaea	Ostreida	Gryphaeidae	Gryphaea	1	Sinemurian		199.3	190.8	stationary, unattached	suspension feeder	epifaunal	1	1	1	12	60	487
Lopha costata	Ostreida	Ostreidae	Lopha	10	Sinemurian		199.3	190.8	cemented	suspension feeder	epifaunal	3	1	1	1	60	487
Modiolus	Mytilida	Mytilidae	Modiolus	2	Sinemurian		199.3	190.8	stationary, attached, epibiont	suspension feeder	semi-infaunal	2	1	2	16	60	487
Parallelodon	Arcida	Parallelodontidae	Parallelodon	3	Sinemurian		199.3	190.8	stationary, attached	suspension feeder	epifaunal	2	1	1	4	60	487
Pholadomya	Pholadomyida	Pholadomyidae	Pholadomya	1	Sinemurian		199.3	190.8	facultatively mobile	suspension feeder	deep infaunal	4	1	4	14	60	487
Parallelodon groeberi	Arcida	Parallelodontidae	Parallelodon		Early Pliensbachian	Late Pliensbachian	189.6	183	stationary, attached	suspension feeder	epifaunal	2	1	1	4	61	3974
Parallelodon riccardii	Arcida	Parallelodontidae	Parallelodon		Early Pliensbachian	Late Pliensbachian	189.6	183	stationary, attached	suspension feeder	epifaunal	2	1	1	4	61	3974
Cucullaea	Arcida	Cucullaeidae	Cucullaea		Early Pliensbachian	Late Pliensbachian	189.6	183	facultatively mobile	suspension feeder	infaunal	4	1	3	3	61	3974
Cucullaea	Arcida	Cucullaeidae	Cucullaea		Early Pliensbachian	Late Pliensbachian	189.6	183	facultatively mobile	suspension feeder	infaunal	4	1	3	3	61	3974
Modiolus	Mytilida	Mytilidae	Modiolus		Early Pliensbachian	Late Pliensbachian	189.6	183	stationary, attached, epibiont	suspension feeder	semi-infaunal	2	1	2	16	61	3974
Gervillaria	Ostreida	Bakevelliidae	Gervillaria		Early Pliensbachian	Late Pliensbachian	189.6	183	stationary, attached	suspension feeder	semi-infaunal	2	1	2	16	61	3974
Gervilleioperna	Ostreida	Malleidae	Gervilleioperna		Early Pliensbachian	Late Pliensbachian	189.6	183	stationary, attached	suspension feeder	epifaunal	2	1	1	4	61	3974
Isognomon	Ostreida	Malleidae	Isognomon		Early Pliensbachian	Late Pliensbachian	189.6	183	stationary, attached	suspension feeder	epifaunal	2	1	1	4	61	3974
Weyla	Pectinida	Neitheidae	Weyla		Early Pliensbachian	Late Pliensbachian	189.6	183	stationary, unattached	suspension feeder	semi-infaunal	1	1	2	20	61	3974
Weyla (Lywea) unca	Pectinida	Neitheidae	Weyla (Lywea)		Early Pliensbachian	Late Pliensbachian	189.6	183	stationary, unattached	suspension feeder	semi-infaunal	1	1	2	20	61	3974
Nuculana (Praesaccella) ovum	Nuculanida	Nuculanidae	Nuculana (Praesaccella)		Early Pliensbachian	Late Pliensbachian	189.6	183	slow motile	deposit feeder, suspension feeder	infaunal	6	2	3	2	61	3974
Lycettia	Mytilida	Mytilidae	Lycettia		Early Pliensbachian	Late Pliensbachian	189.6	183	stationary, attached	suspension feeder	epifaunal	2	1	1	4	61	3974
Falcimytilus	Mytilida	Mytilidae	Falcimytilus		Early Pliensbachian	Late Pliensbachian	189.6	183	stationary, attached	suspension feeder	epifaunal	2	1	1	4	61	3974
Myoconcha neuquena	Cardiida	Kalenteridae	Myoconcha		Early Pliensbachian	Late Pliensbachian	189.6	183	stationary, attached	suspension feeder	semi-infaunal	2	1	2	16	61	3974
Weyla (Lywea) unca	Pectinida	Neitheidae	Weyla (Lywea)		Early Pliensbachian	Late Pliensbachian	189.6	183	stationary, unattached	suspension feeder	semi-infaunal	1	1	2	20	61	3974
Weyla	Pectinida	Neitheidae	Weyla		Early Pliensbachian	Late Pliensbachian	189.6	183	stationary, unattached	suspension feeder	semi-infaunal	1	1	2	20	61	3974
Harpax rapa	Pectinida	Plicatulidae	Harpax		Early Pliensbachian	Late Pliensbachian	189.6	183	cemented	suspension feeder	epifaunal	3	1	1	1	61	3974
Gervillaria pallas	Ostreida	Bakevelliidae	Gervillaria		Early Pliensbachian	Late Pliensbachian	189.6	183	stationary, attached	suspension feeder	semi-infaunal	2	1	2	16	61	3974
Pinna folium	Ostreida	Pinnidae	Pinna		Early Pliensbachian	Late Pliensbachian	189.6	183	stationary, attached	suspension feeder	semi-infaunal	2	1	2	16	61	3974
Modiolus gerthi	Mytilida	Mytilidae	Modiolus		Early Pliensbachian	Late Pliensbachian	189.6	183	stationary, attached, epibiont	suspension feeder	semi-infaunal	2	1	2	16	61	3974
Parallelodon riccardii	Arcida	Parallelodontidae	Parallelodon		Early Pliensbachian	Late Pliensbachian	189.6	183	stationary, attached	suspension feeder	epifaunal	2	1	1	4	61	3974
Parallelodon groeberi	Arcida	Parallelodontidae	Parallelodon		Early Pliensbachian	Late Pliensbachian	189.6	183	stationary, attached	suspension feeder	epifaunal	2	1	1	4	61	3974
Lycettia	Mytilida	Mytilidae	Lycettia		Early Pliensbachian	Late Pliensbachian	189.6	183	stationary, attached	suspension feeder	epifaunal	2	1	1	4	61	3974
Cucullaea	Arcida	Cucullaeidae	Cucullaea		Early Pliensbachian	Late Pliensbachian	189.6	183	facultatively mobile	suspension feeder	infaunal	4	1	3	3	61	3974
Myophorella (Myophorella)	Trigoniida	Myophorellidae	Myophorella (Myophorella)		Early Pliensbachian	Late Pliensbachian	189.6	183	facultatively mobile	suspension feeder	infaunal	4	1	3	3	61	3974
Myophorella (Myophorella) araucana	Trigoniida	Myophorellidae	Myophorella (Myophorella)		Early Pliensbachian	Late Pliensbachian	189.6	183	facultatively mobile	suspension feeder	infaunal	4	1	3	3	61	3974
Frenguelliella inexspectata	Trigoniida	Laevitrigoniidae	Frenguelliella		Early Pliensbachian	Late Pliensbachian	189.6	183	facultatively mobile	suspension feeder	infaunal	4	1	3	3	61	3974
Gervillaria pallas	Ostreida	Bakevelliidae	Gervillaria		Early Pliensbachian		189.6	183	stationary, attached	suspension feeder	semi-infaunal	2	1	2	16	61	3974
Pinna folium	Ostreida	Pinnidae	Pinna		Early Pliensbachian		189.6	183	stationary, attached	suspension feeder	semi-infaunal	2	1	2	16	61	3974
Weyla	Pectinida	Neitheidae	Weyla		Early Pliensbachian		189.6	183	stationary, unattached	suspension feeder	semi-infaunal	1	1	2	20	61	3974
Myophorella	Trigoniida	Myophorellidae	Myophorella		Early Pliensbachian		189.6	183	facultatively mobile	suspension feeder	infaunal	4	1	3	3	61	3974
Nuculopsis	Nuculida	Nuculidae	Nuculopsis		Wuchiapingian		259.9	254.17	slow motile	deposit feeder, suspension feeder	infaunal	6	2	3	2	50	4145
Polidevcia	Nuculanida	Polidevciidae	Polidevcia		Wuchiapingian		259.9	254.17	slow motile	deposit feeder, suspension feeder	infaunal	6	2	3	2	50	4145
Girtypecten	Pectinida	Heteropectinidae	Girtypecten		Wuchiapingian		259.9	254.17	stationary	suspension feeder	epifaunal	2	1	1	4	50	4145
Pseudomonotis	Pectinida	Pseudomonotidae	Pseudomonotis		Wuchiapingian		259.9	254.17	stationary	suspension feeder	epifaunal	2	1	1	4	50	4145
Schizodus bifidus	Trigoniida	Schizodidae	Schizodus		Wuchiapingian		259.9	254.17	facultatively mobile	suspension feeder	infaunal	4	1	3	3	50	4145
Celtoides	Cardiida	Kalenteridae	Celtoides		Wuchiapingian		259.9	254.17	facultatively mobile	suspension feeder	infaunal	4	1	3	3	50	4145
Nuculopsis	Nuculida	Nuculidae	Nuculopsis		Wuchiapingian		259.9	254.17	slow motile	deposit feeder, suspension feeder	infaunal	6	2	3	2	50	4145
Polidevcia obesa	Nuculanida	Polidevciidae	Polidevcia		Wuchiapingian		259.9	254.17	slow motile	deposit feeder, suspension feeder	infaunal	6	2	3	2	50	4145
Myalina (Myalina) wyomingensis	Myalinida	Myalinidae	Myalina (Myalina)		Wuchiapingian		259.9	254.17	stationary, attached	suspension feeder	epifaunal	2	1	1	4	50	4145
Bakevellia	Ostreida	Bakevelliidae	Bakevellia		Wuchiapingian		259.9	254.17	stationary	suspension feeder	semi-infaunal	2	1	2	16	50	4145
Cassianoides sexcostatus	Pectinida	Heteropectinidae	Cassianoides		Wuchiapingian		259.9	254.17	stationary	suspension feeder	epifaunal	2	1	1	4	50	4145
Aviculopinna	Ostreida	Pinnidae	Aviculopinna		Wuchiapingian		259.9	254.17	stationary, attached	suspension feeder	semi-infaunal	2	1	2	16	50	4145
Cyrtorostra varicostata	Pectinida	Deltopectinidae	Cyrtorostra		Wuchiapingian		259.9	254.17	stationary	suspension feeder	epifaunal	2	1	1	4	50	4145
Heteropecten vanvleeti	Pectinida	Heteropectinidae	Heteropecten		Wuchiapingian		259.9	254.17	stationary	suspension feeder	epifaunal	2	1	1	4	50	4145
Aviculopecten	Pectinida	Aviculopectinidae	Aviculopecten		Wuchiapingian		259.9	254.17	stationary	suspension feeder	epifaunal	2	1	1	4	50	4145
Girtypecten	Pectinida	Heteropectinidae	Girtypecten		Wuchiapingian		259.9	254.17	stationary	suspension feeder	epifaunal	2	1	1	4	50	4145
Cyrtorostra varicostata	Pectinida	Deltopectinidae	Cyrtorostra		Wuchiapingian		259.9	254.17	stationary	suspension feeder	epifaunal	2	1	1	4	50	4145
Pseudomonotis	Pectinida	Pseudomonotidae	Pseudomonotis		Wuchiapingian		259.9	254.17	stationary	suspension feeder	epifaunal	2	1	1	4	50	4145
Schizodus bifidus	Trigoniida	Schizodidae	Schizodus		Wuchiapingian		259.9	254.17	facultatively mobile	suspension feeder	infaunal	4	1	3	3	50	4145
Schizodus canalis	Trigoniida	Schizodidae	Schizodus		Wuchiapingian		259.9	254.17	facultatively mobile	suspension feeder	infaunal	4	1	3	3	50	4145
Schizodus	Trigoniida	Schizodidae	Schizodus		Wuchiapingian		259.9	254.17	facultatively mobile	suspension feeder	infaunal	4	1	3	3	50	4145
Scaphellina concinna	Trigoniida	Scaphellinidae	Scaphellina		Wuchiapingian		259.9	254.17	facultatively mobile	suspension feeder	infaunal	4	1	3	3	50	4145
Astartella	Carditida	Astartidae	Astartella		Wuchiapingian		259.9	254.17	slow motile	suspension feeder	shallow infaunal	6	1	3	17	50	4145
Wilkingia	NO_ORDER_SPECIFIED	Sanguinolitidae	Wilkingia		Wuchiapingian		259.9	254.17	facultatively mobile	suspension feeder	deep infaunal	4	1	4	14	50	4145
Heteropecten vanvleeti	Pectinida	Heteropectinidae	Heteropecten		Wuchiapingian		259.9	254.17	stationary	suspension feeder	epifaunal	2	1	1	4	50	4145
Girtypecten	Pectinida	Heteropectinidae	Girtypecten		Wuchiapingian		259.9	254.17	stationary	suspension feeder	epifaunal	2	1	1	4	50	4145
Schizodus bifidus	Trigoniida	Schizodidae	Schizodus		Wuchiapingian		259.9	254.17	facultatively mobile	suspension feeder	infaunal	4	1	3	3	50	4145
Pseudopermophorus annettae	Cardiida	Kalenteridae	Pseudopermophorus		Wuchiapingian		259.9	254.17	stationary, attached	suspension feeder	semi-infaunal	2	1	2	16	50	4145
Palaeoneilo	Nuculanida	Malletiidae	Palaeoneilo		Wuchiapingian		259.9	254.17	slow motile	deposit feeder, suspension feeder	infaunal	6	2	3	2	50	4145
Nuculopsis	Nuculida	Nuculidae	Nuculopsis		Wuchiapingian		259.9	254.17	slow motile	deposit feeder, suspension feeder	infaunal	6	2	3	2	50	4145
Polidevcia	Nuculanida	Polidevciidae	Polidevcia		Wuchiapingian		259.9	254.17	slow motile	deposit feeder, suspension feeder	infaunal	6	2	3	2	50	4145
Astartella subquadrata	Carditida	Astartidae	Astartella		Wuchiapingian		259.9	254.17	slow motile	suspension feeder	shallow infaunal	6	1	3	17	50	4145
Permophorus albequus	Cardiida	Kalenteridae	Permophorus		Wuchiapingian		259.9	254.17	stationary, attached	suspension feeder	semi-infaunal	2	1	2	16	50	4145
Vacunella elongata	NO_ORDER_SPECIFIED	Sanguinolitidae	Vacunella		Wuchiapingian		259.9	254.17	facultatively mobile	suspension feeder	deep infaunal	4	1	4	14	50	4145
Streblochondria	Pectinida	Streblochondriidae	Streblochondria		Wuchiapingian		259.9	254.17	stationary	suspension feeder	epifaunal	2	1	1	4	50	4145
Polidevcia obesa	Nuculanida	Polidevciidae	Polidevcia		Wuchiapingian		259.9	254.17	slow motile	deposit feeder, suspension feeder	infaunal	6	2	3	2	50	4145
Heteropecten vanvleeti	Pectinida	Heteropectinidae	Heteropecten		Wuchiapingian		259.9	254.17	stationary	suspension feeder	epifaunal	2	1	1	4	50	11472
Aviculopecten	Pectinida	Aviculopectinidae	Aviculopecten		Wuchiapingian		259.9	254.17	stationary	suspension feeder	epifaunal	2	1	1	4	50	4145
Schizodus	Trigoniida	Schizodidae	Schizodus		Wuchiapingian		259.9	254.17	facultatively mobile	suspension feeder	infaunal	4	1	3	3	50	4145
Permophorus albequus	Cardiida	Kalenteridae	Permophorus		Wuchiapingian		259.9	254.17	stationary, attached	suspension feeder	semi-infaunal	2	1	2	16	50	4145
Edmondia	Pholadomyida	Edmondiidae	Edmondia		Wuchiapingian		259.9	254.17	facultatively mobile	suspension feeder	infaunal	4	1	3	3	50	4145
Nuculopsis	Nuculida	Nuculidae	Nuculopsis		Wuchiapingian		259.9	254.17	slow motile	deposit feeder, suspension feeder	infaunal	6	2	3	2	50	4145
Polidevcia obesa	Nuculanida	Polidevciidae	Polidevcia		Wuchiapingian		259.9	254.17	slow motile	deposit feeder, suspension feeder	infaunal	6	2	3	2	50	4145
Aviculopecten	Pectinida	Aviculopectinidae	Aviculopecten		Wuchiapingian		259.9	254.17	stationary	suspension feeder	epifaunal	2	1	1	4	50	4145
Girtypecten	Pectinida	Heteropectinidae	Girtypecten		Wuchiapingian		259.9	254.17	stationary	suspension feeder	epifaunal	2	1	1	4	50	4145
Streblopteria montpelierensis	Pectinida	Streblochondriidae	Streblopteria		Wuchiapingian		259.9	254.17	actively mobile	suspension feeder	nektobenthic	2	1	1	4	50	4145
Streblochondria	Pectinida	Streblochondriidae	Streblochondria		Wuchiapingian		259.9	254.17	stationary	suspension feeder	epifaunal	2	1	1	4	50	4145
Polidevcia obesa	Nuculanida	Polidevciidae	Polidevcia		Wuchiapingian		259.9	254.17	slow motile	deposit feeder, suspension feeder	infaunal	6	2	3	2	50	4145
Daonella	Ostreida	Halobiidae	Daonella		Ladinian		242	237	facultatively mobile, unattached	suspension feeder	epifaunal	5	1	1	19	55	6335
Weyla (Weyla) alata	Pectinida	Neitheidae	Weyla (Weyla)		Late Sinemurian		196.5	189.6	stationary, unattached	suspension feeder	semi-infaunal	1	1	2	20	60	6529
Isognomon	Ostreida	Malleidae	Isognomon		Late Sinemurian		196.5	189.6	stationary, attached	suspension feeder	epifaunal	2	1	1	4	60	6529
Antiquilima	Pectinida	Limidae	Antiquilima		Late Sinemurian		196.5	189.6	stationary, attached	suspension feeder	low-level epifaunal	2	1	1	4	60	6529
Frenguelliella	Trigoniida	Laevitrigoniidae	Frenguelliella		Late Sinemurian		196.5	189.6	facultatively mobile	suspension feeder	infaunal	4	1	3	3	60	6529
Lithiotis problematica	Ostreida	Malleidae	Lithiotis		Late Pliensbachian		189.6	183	stationary, attached	suspension feeder, photosymbiotic	epifaunal, gregarious	3	9	1	21	61	11270
Placunopsis ostracina	Pectinida	Anomiidae	Placunopsis	very abundant	Ladinian		242	237	stationary, attached	suspension feeder	epifaunal, gregarious	2	1	1	4	55	6681
Myophoria (Costatoria) goldfussi	Trigoniida	Myophoriidae	Costatoria	rare	Ladinian		242	237	facultatively mobile	suspension feeder	infaunal	4	1	3	3	55	6681
Palaeoneilo galatea	Nuculanida	Malletiidae	Palaeoneilo	2	Late Pliensbachian		189.6	183	slow motile	deposit feeder, suspension feeder	infaunal	6	2	3	2	61	6743
Palaeonucula	Nuculida	Nuculidae	Palaeonucula	7	Late Pliensbachian		189.6	183	slow motile	deposit feeder, suspension feeder	infaunal	6	2	3	2	61	6743
Rollieria	Nuculanida	Yoldiidae	Rollieria	3	Late Pliensbachian		189.6	183	facultatively mobile	deposit feeder, suspension feeder	infaunal	4	2	3	10	61	6743
Palaeoneilo galatea	Nuculanida	Malletiidae	Palaeoneilo	4	Late Pliensbachian		189.6	183	slow motile	deposit feeder, suspension feeder	infaunal	6	2	3	2	61	6743
Parallelodon	Arcida	Parallelodontidae	Parallelodon	1	Late Pliensbachian		189.6	183	stationary, attached	suspension feeder	epifaunal	2	1	1	4	61	6743
Grammatodon concinnus	Arcida	Parallelodontidae	Grammatodon	1	Late Pliensbachian		189.6	183	stationary, attached	suspension feeder	epifaunal	2	1	1	4	61	6743
Oxytoma (Oxytoma)	Pectinida	Oxytomidae	Oxytoma (Oxytoma)	3	Late Pliensbachian		189.6	183	stationary, attached	suspension feeder	epifaunal	2	1	1	4	61	6743
Palaeonucula	Nuculida	Nuculidae	Palaeonucula	2	Late Pliensbachian		189.6	183	slow motile	deposit feeder, suspension feeder	infaunal	6	2	3	2	61	6743
Nuculana (Praesaccella)	Nuculanida	Nuculanidae	Nuculana (Praesaccella)	1	Late Pliensbachian		189.6	183	slow motile	deposit feeder, suspension feeder	infaunal	6	2	3	2	61	6743
Rollieria	Nuculanida	Yoldiidae	Rollieria	7	Late Pliensbachian		189.6	183	facultatively mobile	deposit feeder, suspension feeder	infaunal	4	2	3	10	61	6743
Palaeoneilo galatea	Nuculanida	Malletiidae	Palaeoneilo	5	Late Pliensbachian		189.6	183	slow motile	deposit feeder, suspension feeder	infaunal	6	2	3	2	61	6743
Limopsis	Arcida	Limopsidae	Limopsis	1	Late Pliensbachian		189.6	183	facultatively mobile	suspension feeder	epifaunal	4	1	1	7	61	6743
Oxytoma (Oxytoma)	Pectinida	Oxytomidae	Oxytoma (Oxytoma)	2	Late Pliensbachian		189.6	183	stationary, attached	suspension feeder	epifaunal	2	1	1	4	61	6743
Nicaniella (Nicaniella)	Carditida	Astartidae	Nicaniella (Nicaniella)	2	Late Pliensbachian		189.6	183	facultatively mobile	suspension feeder	infaunal	4	1	3	3	61	6743
Coelocyprina	Veneroidei	Arcticidae	Coelocyprina	2	Late Pliensbachian		189.6	183	facultatively mobile	suspension feeder	infaunal	4	1	3	3	61	6743
Palaeonucula	Nuculida	Nuculidae	Palaeonucula	4	Late Pliensbachian		189.6	183	slow motile	deposit feeder, suspension feeder	infaunal	6	2	3	2	61	6743
Rollieria	Nuculanida	Yoldiidae	Rollieria	8	Late Pliensbachian		189.6	183	facultatively mobile	deposit feeder, suspension feeder	infaunal	4	2	3	10	61	6743
Rollieria	Nuculanida	Yoldiidae	Rollieria	1	Late Pliensbachian		189.6	183	facultatively mobile	deposit feeder, suspension feeder	infaunal	4	2	3	10	61	6743
Palaeoneilo galatea	Nuculanida	Malletiidae	Palaeoneilo	1	Late Pliensbachian		189.6	183	slow motile	deposit feeder, suspension feeder	infaunal	6	2	3	2	61	6743
Parallelodon	Arcida	Parallelodontidae	Parallelodon	1	Late Pliensbachian		189.6	183	stationary, attached	suspension feeder	epifaunal	2	1	1	4	61	6743
Oxytoma (Oxytoma)	Pectinida	Oxytomidae	Oxytoma (Oxytoma)	7	Late Pliensbachian		189.6	183	stationary, attached	suspension feeder	epifaunal	2	1	1	4	61	6743
Palaeonucula	Nuculida	Nuculidae	Palaeonucula	4	Late Pliensbachian		189.6	183	slow motile	deposit feeder, suspension feeder	infaunal	6	2	3	2	61	6743
Rollieria	Nuculanida	Yoldiidae	Rollieria	6	Late Pliensbachian		189.6	183	facultatively mobile	deposit feeder, suspension feeder	infaunal	4	2	3	10	61	6743
Limopsis	Arcida	Limopsidae	Limopsis	1	Late Pliensbachian		189.6	183	facultatively mobile	suspension feeder	epifaunal	4	1	1	7	61	6743
Oxytoma (Oxytoma)	Pectinida	Oxytomidae	Oxytoma (Oxytoma)	5	Late Pliensbachian		189.6	183	stationary, attached	suspension feeder	epifaunal	2	1	1	4	61	6743
Coelocyprina	Veneroidei	Arcticidae	Coelocyprina	1	Late Pliensbachian		189.6	183	facultatively mobile	suspension feeder	infaunal	4	1	3	3	61	6743
Palaeonucula	Nuculida	Nuculidae	Palaeonucula	1	Late Pliensbachian		189.6	183	slow motile	deposit feeder, suspension feeder	infaunal	6	2	3	2	61	6743
Palaeoneilo galatea	Nuculanida	Malletiidae	Palaeoneilo	4	Late Pliensbachian		189.6	183	slow motile	deposit feeder, suspension feeder	infaunal	6	2	3	2	61	6743
Parallelodon	Arcida	Parallelodontidae	Parallelodon	3	Late Pliensbachian		189.6	183	stationary, attached	suspension feeder	epifaunal	2	1	1	4	61	6743
Oxytoma (Oxytoma)	Pectinida	Oxytomidae	Oxytoma (Oxytoma)	8	Late Pliensbachian		189.6	183	stationary, attached	suspension feeder	epifaunal	2	1	1	4	61	6743
Plicatula spinosa	Pectinida	Plicatulidae	Plicatula	5	Late Pliensbachian		189.6	183	stationary, attached, epibiont	suspension feeder	epifaunal	2	1	1	4	61	6743
Placunopsis	Pectinida	Anomiidae	Placunopsis	1	Late Pliensbachian		189.6	183	stationary, attached	suspension feeder	epifaunal, gregarious	2	1	1	4	61	6743
Myoconcha	Cardiida	Kalenteridae	Myoconcha	1	Late Pliensbachian		189.6	183	stationary, attached	suspension feeder	semi-infaunal	2	1	2	16	61	6743
Nicaniella (Nicaniella)	Carditida	Astartidae	Nicaniella (Nicaniella)	3	Late Pliensbachian		189.6	183	facultatively mobile	suspension feeder	infaunal	4	1	3	3	61	6743
Palaeonucula	Nuculida	Nuculidae	Palaeonucula	2	Late Pliensbachian		189.6	183	slow motile	deposit feeder, suspension feeder	infaunal	6	2	3	2	61	6743
Rollieria	Nuculanida	Yoldiidae	Rollieria	1	Late Pliensbachian		189.6	183	facultatively mobile	deposit feeder, suspension feeder	infaunal	4	2	3	10	61	6743
Palaeoneilo galatea	Nuculanida	Malletiidae	Palaeoneilo	20	Late Pliensbachian		189.6	183	slow motile	deposit feeder, suspension feeder	infaunal	6	2	3	2	61	6743
Parallelodon	Arcida	Parallelodontidae	Parallelodon	14	Late Pliensbachian		189.6	183	stationary, attached	suspension feeder	epifaunal	2	1	1	4	61	6743
Limopsis	Arcida	Limopsidae	Limopsis	2	Late Pliensbachian		189.6	183	facultatively mobile	suspension feeder	epifaunal	4	1	1	7	61	6743
Nucinella	Solemyida	Nucinellidae	Nucinella	1	Late Pliensbachian		189.6	183	facultatively mobile	chemosymbiotic	infaunal	4	9	3	11	61	6743
Oxytoma (Oxytoma)	Pectinida	Oxytomidae	Oxytoma (Oxytoma)	4	Late Pliensbachian		189.6	183	stationary, attached	suspension feeder	epifaunal	2	1	1	4	61	6743
Anningella	Pectinida	Buchiidae	Anningella	1	Late Pliensbachian		189.6	183	stationary	suspension feeder	epifaunal	2	1	1	4	61	6743
Plicatula spinosa	Pectinida	Plicatulidae	Plicatula	2	Late Pliensbachian		189.6	183	stationary, attached, epibiont	suspension feeder	epifaunal	2	1	1	4	61	6743
Myoconcha	Cardiida	Kalenteridae	Myoconcha	1	Late Pliensbachian		189.6	183	stationary, attached	suspension feeder	semi-infaunal	2	1	2	16	61	6743
Nicaniella (Nicaniella)	Carditida	Astartidae	Nicaniella (Nicaniella)	1	Late Pliensbachian		189.6	183	facultatively mobile	suspension feeder	infaunal	4	1	3	3	61	6743
Palaeonucula	Nuculida	Nuculidae	Palaeonucula	3	Late Pliensbachian		189.6	183	slow motile	deposit feeder, suspension feeder	infaunal	6	2	3	2	61	6743
Palaeoneilo galatea	Nuculanida	Malletiidae	Palaeoneilo	13	Late Pliensbachian		189.6	183	slow motile	deposit feeder, suspension feeder	infaunal	6	2	3	2	61	6743
Parallelodon	Arcida	Parallelodontidae	Parallelodon	19	Late Pliensbachian		189.6	183	stationary, attached	suspension feeder	epifaunal	2	1	1	4	61	6743
Grammatodon concinnus	Arcida	Parallelodontidae	Grammatodon	2	Late Pliensbachian		189.6	183	stationary, attached	suspension feeder	epifaunal	2	1	1	4	61	6743
Limopsis	Arcida	Limopsidae	Limopsis	1	Late Pliensbachian		189.6	183	facultatively mobile	suspension feeder	epifaunal	4	1	1	7	61	6743
Limopsis (Limopsis)	Arcida	Limopsidae	Limopsis (Limopsis)	3	Late Pliensbachian		189.6	183	facultatively mobile	suspension feeder	epifaunal	4	1	1	7	61	6743
Nucinella	Solemyida	Nucinellidae	Nucinella	2	Late Pliensbachian		189.6	183	facultatively mobile	chemosymbiotic	infaunal	4	9	3	11	61	6743
Oxytoma (Oxytoma)	Pectinida	Oxytomidae	Oxytoma (Oxytoma)	15	Late Pliensbachian		189.6	183	stationary, attached	suspension feeder	epifaunal	2	1	1	4	61	6743
Meleagrinella	Pectinida	Oxytomidae	Meleagrinella	1	Late Pliensbachian		189.6	183	facultatively mobile, attached	suspension feeder	epifaunal	5	1	1	19	61	6743
Kolymonectes	Pectinida	Entolioididae	Kolymonectes	1	Late Pliensbachian		189.6	183	facultatively mobile, unattached	suspension feeder	epifaunal	4	1	1	7	61	6743
Anningella	Pectinida	Buchiidae	Anningella	2	Late Pliensbachian		189.6	183	stationary	suspension feeder	epifaunal	2	1	1	4	61	6743
Plicatula spinosa	Pectinida	Plicatulidae	Plicatula	5	Late Pliensbachian		189.6	183	stationary, attached, epibiont	suspension feeder	epifaunal	2	1	1	4	61	6743
Myoconcha	Cardiida	Kalenteridae	Myoconcha	3	Late Pliensbachian		189.6	183	stationary, attached	suspension feeder	semi-infaunal	2	1	2	16	61	6743
Nicaniella (Nicaniella)	Carditida	Astartidae	Nicaniella (Nicaniella)	2	Late Pliensbachian		189.6	183	facultatively mobile	suspension feeder	infaunal	4	1	3	3	61	6743
Palaeonucula	Nuculida	Nuculidae	Palaeonucula	1	Late Pliensbachian		189.6	183	slow motile	deposit feeder, suspension feeder	infaunal	6	2	3	2	61	6743
Rollieria	Nuculanida	Yoldiidae	Rollieria	1	Late Pliensbachian		189.6	183	facultatively mobile	deposit feeder, suspension feeder	infaunal	4	2	3	10	61	6743
Palaeoneilo galatea	Nuculanida	Malletiidae	Palaeoneilo	10	Late Pliensbachian		189.6	183	slow motile	deposit feeder, suspension feeder	infaunal	6	2	3	2	61	6743
Parallelodon	Arcida	Parallelodontidae	Parallelodon	9	Late Pliensbachian		189.6	183	stationary, attached	suspension feeder	epifaunal	2	1	1	4	61	6743
Grammatodon concinnus	Arcida	Parallelodontidae	Grammatodon	1	Late Pliensbachian		189.6	183	stationary, attached	suspension feeder	epifaunal	2	1	1	4	61	6743
Limopsis	Arcida	Limopsidae	Limopsis	2	Late Pliensbachian		189.6	183	facultatively mobile	suspension feeder	epifaunal	4	1	1	7	61	6743
Limopsis (Limopsis)	Arcida	Limopsidae	Limopsis (Limopsis)	1	Late Pliensbachian		189.6	183	facultatively mobile	suspension feeder	epifaunal	4	1	1	7	61	6743
Oxytoma (Oxytoma)	Pectinida	Oxytomidae	Oxytoma (Oxytoma)	6	Late Pliensbachian		189.6	183	stationary, attached	suspension feeder	epifaunal	2	1	1	4	61	6743
Plicatula spinosa	Pectinida	Plicatulidae	Plicatula	15	Late Pliensbachian		189.6	183	stationary, attached, epibiont	suspension feeder	epifaunal	2	1	1	4	61	6743
Myoconcha	Cardiida	Kalenteridae	Myoconcha	1	Late Pliensbachian		189.6	183	stationary, attached	suspension feeder	semi-infaunal	2	1	2	16	61	6743
Palaeonucula hammeri	Nuculida	Nuculidae	Palaeonucula	1	Late Pliensbachian		189.6	183	slow motile	deposit feeder, suspension feeder	infaunal	6	2	3	2	61	6743
Rollieria	Nuculanida	Yoldiidae	Rollieria	5	Late Pliensbachian		189.6	183	facultatively mobile	deposit feeder, suspension feeder	infaunal	4	2	3	10	61	6743
Palaeoneilo galatea	Nuculanida	Malletiidae	Palaeoneilo	18	Late Pliensbachian		189.6	183	slow motile	deposit feeder, suspension feeder	infaunal	6	2	3	2	61	6743
Parallelodon	Arcida	Parallelodontidae	Parallelodon	16	Late Pliensbachian		189.6	183	stationary, attached	suspension feeder	epifaunal	2	1	1	4	61	6743
Limopsis	Arcida	Limopsidae	Limopsis	2	Late Pliensbachian		189.6	183	facultatively mobile	suspension feeder	epifaunal	4	1	1	7	61	6743
Limopsis (Limopsis)	Arcida	Limopsidae	Limopsis (Limopsis)	5	Late Pliensbachian		189.6	183	facultatively mobile	suspension feeder	epifaunal	4	1	1	7	61	6743
Pseudomytiloides	Myalinida	Inoceramidae	Pseudomytiloides	2	Late Pliensbachian		189.6	183	facultatively mobile, attached	suspension feeder	epifaunal	5	1	1	19	61	6743
Oxytoma (Oxytoma)	Pectinida	Oxytomidae	Oxytoma (Oxytoma)	23	Late Pliensbachian		189.6	183	stationary, attached	suspension feeder	epifaunal	2	1	1	4	61	6743
Anningella	Pectinida	Buchiidae	Anningella	6	Late Pliensbachian		189.6	183	stationary	suspension feeder	epifaunal	2	1	1	4	61	6743
Plicatula spinosa	Pectinida	Plicatulidae	Plicatula	24	Late Pliensbachian		189.6	183	stationary, attached, epibiont	suspension feeder	epifaunal	2	1	1	4	61	6743
Myoconcha	Cardiida	Kalenteridae	Myoconcha	1	Late Pliensbachian		189.6	183	stationary, attached	suspension feeder	semi-infaunal	2	1	2	16	61	6743
Nicaniella (Nicaniella)	Carditida	Astartidae	Nicaniella (Nicaniella)	1	Late Pliensbachian		189.6	183	facultatively mobile	suspension feeder	infaunal	4	1	3	3	61	6743
Palaeonucula	Nuculida	Nuculidae	Palaeonucula	20	Late Pliensbachian		189.6	183	slow motile	deposit feeder, suspension feeder	infaunal	6	2	3	2	61	6743
Rollieria	Nuculanida	Yoldiidae	Rollieria	3	Late Pliensbachian		189.6	183	facultatively mobile	deposit feeder, suspension feeder	infaunal	4	2	3	10	61	6743
Palaeoneilo galatea	Nuculanida	Malletiidae	Palaeoneilo	3	Late Pliensbachian		189.6	183	slow motile	deposit feeder, suspension feeder	infaunal	6	2	3	2	61	6743
Limopsis	Arcida	Limopsidae	Limopsis	1	Late Pliensbachian		189.6	183	facultatively mobile	suspension feeder	epifaunal	4	1	1	7	61	6743
Oxytoma (Oxytoma)	Pectinida	Oxytomidae	Oxytoma (Oxytoma)	16	Late Pliensbachian		189.6	183	stationary, attached	suspension feeder	epifaunal	2	1	1	4	61	6743
Anningella	Pectinida	Buchiidae	Anningella	1	Late Pliensbachian		189.6	183	stationary	suspension feeder	epifaunal	2	1	1	4	61	6743
Plicatula spinosa	Pectinida	Plicatulidae	Plicatula	12	Late Pliensbachian		189.6	183	stationary, attached, epibiont	suspension feeder	epifaunal	2	1	1	4	61	6743
Plagiostoma	Pectinida	Limidae	Plagiostoma	2	Late Pliensbachian		189.6	183	stationary, attached	suspension feeder	low-level epifaunal	2	1	1	4	61	6743
Cuspidaria	Poromyida	Cuspidariidae	Cuspidaria	1	Late Pliensbachian		189.6	183	facultatively mobile	carnivore	infaunal	4	6	3	6	61	6743
Palaeonucula	Nuculida	Nuculidae	Palaeonucula		Late Pliensbachian		189.6	183	slow motile	deposit feeder, suspension feeder	infaunal	6	2	3	2	61	6774
Rollieria	Nuculanida	Yoldiidae	Rollieria		Late Pliensbachian		189.6	183	facultatively mobile	deposit feeder, suspension feeder	infaunal	4	2	3	10	61	6774
Rollieria	Nuculanida	Yoldiidae	Rollieria		Late Pliensbachian		189.6	183	facultatively mobile	deposit feeder, suspension feeder	infaunal	4	2	3	10	61	6774
Palaeoneilo galatea	Nuculanida	Malletiidae	Palaeoneilo		Late Pliensbachian		189.6	183	slow motile	deposit feeder, suspension feeder	infaunal	6	2	3	2	61	6774
Parallelodon	Arcida	Parallelodontidae	Parallelodon		Late Pliensbachian		189.6	183	stationary, attached	suspension feeder	epifaunal	2	1	1	4	61	6774
Grammatodon	Arcida	Parallelodontidae	Grammatodon		Late Pliensbachian		189.6	183	stationary, attached	suspension feeder	epifaunal	2	1	1	4	61	6774
Grammatodon concinnus	Arcida	Parallelodontidae	Grammatodon		Late Pliensbachian		189.6	183	stationary, attached	suspension feeder	epifaunal	2	1	1	4	61	6774
Nucinella	Solemyida	Nucinellidae	Nucinella		Late Pliensbachian		189.6	183	facultatively mobile	chemosymbiotic	infaunal	4	9	3	11	61	6774
Oxytoma	Pectinida	Oxytomidae	Oxytoma		Late Pliensbachian		189.6	183	facultatively mobile, attached	suspension feeder	epifaunal	5	1	1	19	61	6774
Nicaniella	Carditida	Astartidae	Nicaniella		Late Pliensbachian		189.6	183	facultatively mobile	suspension feeder	infaunal	4	1	3	3	61	6774
Pressastarte	Carditida	Astartidae	Pressastarte		Late Pliensbachian		189.6	183	facultatively mobile	suspension feeder	infaunal	4	1	3	3	61	6774
Palaeonucula hammeri	Nuculida	Nuculidae	Palaeonucula	1	Late Pliensbachian		189.6	183	slow motile	deposit feeder, suspension feeder	infaunal	6	2	3	2	61	6774
Palaeonucula	Nuculida	Nuculidae	Palaeonucula	26	Late Pliensbachian		189.6	183	slow motile	deposit feeder, suspension feeder	infaunal	6	2	3	2	61	6774
Rollieria	Nuculanida	Yoldiidae	Rollieria	13	Late Pliensbachian		189.6	183	facultatively mobile	deposit feeder, suspension feeder	infaunal	4	2	3	10	61	6774
Rollieria	Nuculanida	Yoldiidae	Rollieria	8	Late Pliensbachian		189.6	183	facultatively mobile	deposit feeder, suspension feeder	infaunal	4	2	3	10	61	6774
Palaeoneilo galatea	Nuculanida	Malletiidae	Palaeoneilo	75	Late Pliensbachian		189.6	183	slow motile	deposit feeder, suspension feeder	infaunal	6	2	3	2	61	6774
Parallelodon	Arcida	Parallelodontidae	Parallelodon	2	Late Pliensbachian		189.6	183	stationary, attached	suspension feeder	epifaunal	2	1	1	4	61	6774
Nucinella	Solemyida	Nucinellidae	Nucinella	6	Late Pliensbachian		189.6	183	facultatively mobile	chemosymbiotic	infaunal	4	9	3	11	61	6774
Oxytoma (Oxytoma)	Pectinida	Oxytomidae	Oxytoma (Oxytoma)	12	Late Pliensbachian		189.6	183	stationary, attached	suspension feeder	epifaunal	2	1	1	4	61	6774
Anningella	Pectinida	Buchiidae	Anningella	7	Late Pliensbachian		189.6	183	stationary	suspension feeder	epifaunal	2	1	1	4	61	6774
Myoconcha	Cardiida	Kalenteridae	Myoconcha	1	Late Pliensbachian		189.6	183	stationary, attached	suspension feeder	semi-infaunal	2	1	2	16	61	6774
Nicaniella (Nicaniella)	Carditida	Astartidae	Nicaniella (Nicaniella)	5	Late Pliensbachian		189.6	183	facultatively mobile	suspension feeder	infaunal	4	1	3	3	61	6774
Nuculoma	Nuculida	Nuculidae	Nuculoma	2	Late Pliensbachian		189.6	183	facultatively mobile	deposit feeder, suspension feeder	infaunal	4	2	3	10	61	6774
Palaeonucula	Nuculida	Nuculidae	Palaeonucula	1	Late Pliensbachian		189.6	183	slow motile	deposit feeder, suspension feeder	infaunal	6	2	3	2	61	6774
Palaeonucula	Nuculida	Nuculidae	Palaeonucula	43	Late Pliensbachian		189.6	183	slow motile	deposit feeder, suspension feeder	infaunal	6	2	3	2	61	6774
Rollieria	Nuculanida	Yoldiidae	Rollieria	23	Late Pliensbachian		189.6	183	facultatively mobile	deposit feeder, suspension feeder	infaunal	4	2	3	10	61	6774
Rollieria	Nuculanida	Yoldiidae	Rollieria	2	Late Pliensbachian		189.6	183	facultatively mobile	deposit feeder, suspension feeder	infaunal	4	2	3	10	61	6774
Palaeoneilo galatea	Nuculanida	Malletiidae	Palaeoneilo	93	Late Pliensbachian		189.6	183	slow motile	deposit feeder, suspension feeder	infaunal	6	2	3	2	61	6774
Isoarca	Nuculanida	Isoarcidae	Isoarca	1	Late Pliensbachian		189.6	183	facultatively mobile	deposit feeder	infaunal	4	2	3	10	61	6774
Parallelodon	Arcida	Parallelodontidae	Parallelodon	6	Late Pliensbachian		189.6	183	stationary, attached	suspension feeder	epifaunal	2	1	1	4	61	6774
Nucinella	Solemyida	Nucinellidae	Nucinella	3	Late Pliensbachian		189.6	183	facultatively mobile	chemosymbiotic	infaunal	4	9	3	11	61	6774
Oxytoma (Oxytoma)	Pectinida	Oxytomidae	Oxytoma (Oxytoma)	17	Late Pliensbachian		189.6	183	stationary, attached	suspension feeder	epifaunal	2	1	1	4	61	6774
Anningella	Pectinida	Buchiidae	Anningella	3	Late Pliensbachian		189.6	183	stationary	suspension feeder	epifaunal	2	1	1	4	61	6774
Plicatula spinosa	Pectinida	Plicatulidae	Plicatula	1	Late Pliensbachian		189.6	183	stationary, attached, epibiont	suspension feeder	epifaunal	2	1	1	4	61	6774
Myoconcha	Cardiida	Kalenteridae	Myoconcha	1	Late Pliensbachian		189.6	183	stationary, attached	suspension feeder	semi-infaunal	2	1	2	16	61	6774
Nicaniella (Nicaniella)	Carditida	Astartidae	Nicaniella (Nicaniella)	7	Late Pliensbachian		189.6	183	facultatively mobile	suspension feeder	infaunal	4	1	3	3	61	6774
Pressastarte	Carditida	Astartidae	Pressastarte	2	Late Pliensbachian		189.6	183	facultatively mobile	suspension feeder	infaunal	4	1	3	3	61	6774
Nuculoma	Nuculida	Nuculidae	Nuculoma	6	Late Pliensbachian		189.6	183	facultatively mobile	deposit feeder, suspension feeder	infaunal	4	2	3	10	61	6774
Palaeonucula	Nuculida	Nuculidae	Palaeonucula	1	Late Pliensbachian		189.6	183	slow motile	deposit feeder, suspension feeder	infaunal	6	2	3	2	61	6774
Palaeonucula	Nuculida	Nuculidae	Palaeonucula	13	Late Pliensbachian		189.6	183	slow motile	deposit feeder, suspension feeder	infaunal	6	2	3	2	61	6774
Rollieria	Nuculanida	Yoldiidae	Rollieria	6	Late Pliensbachian		189.6	183	facultatively mobile	deposit feeder, suspension feeder	infaunal	4	2	3	10	61	6774
Rollieria	Nuculanida	Yoldiidae	Rollieria	6	Late Pliensbachian		189.6	183	facultatively mobile	deposit feeder, suspension feeder	infaunal	4	2	3	10	61	6774
Palaeoneilo galatea	Nuculanida	Malletiidae	Palaeoneilo	27	Late Pliensbachian		189.6	183	slow motile	deposit feeder, suspension feeder	infaunal	6	2	3	2	61	6774
Parallelodon	Arcida	Parallelodontidae	Parallelodon	7	Late Pliensbachian		189.6	183	stationary, attached	suspension feeder	epifaunal	2	1	1	4	61	6774
Nucinella	Solemyida	Nucinellidae	Nucinella	1	Late Pliensbachian		189.6	183	facultatively mobile	chemosymbiotic	infaunal	4	9	3	11	61	6774
Oxytoma (Oxytoma)	Pectinida	Oxytomidae	Oxytoma (Oxytoma)	1	Late Pliensbachian		189.6	183	stationary, attached	suspension feeder	epifaunal	2	1	1	4	61	6774
Plicatula spinosa	Pectinida	Plicatulidae	Plicatula	1	Late Pliensbachian		189.6	183	stationary, attached, epibiont	suspension feeder	epifaunal	2	1	1	4	61	6774
Myoconcha	Cardiida	Kalenteridae	Myoconcha	1	Late Pliensbachian		189.6	183	stationary, attached	suspension feeder	semi-infaunal	2	1	2	16	61	6774
Nicaniella (Nicaniella)	Carditida	Astartidae	Nicaniella (Nicaniella)	8	Late Pliensbachian		189.6	183	facultatively mobile	suspension feeder	infaunal	4	1	3	3	61	6774
Pressastarte	Carditida	Astartidae	Pressastarte	2	Late Pliensbachian		189.6	183	facultatively mobile	suspension feeder	infaunal	4	1	3	3	61	6774
Bakevellia	Ostreida	Bakevelliidae	Bakevellia	10	Wuchiapingian		259.9	254.17	stationary	suspension feeder	semi-infaunal	2	1	2	16	50	6813
Parallelodon striatus	Arcida	Parallelodontidae	Parallelodon	3	Wuchiapingian		259.9	254.17	stationary, attached	suspension feeder	epifaunal	2	1	1	4	50	6813
Pseudomonotis (Pseudomonotis) speluncaria	Pectinida	Pseudomonotidae	Pseudomonotis (Pseudomonotis)	8	Wuchiapingian		259.9	254.17	stationary	suspension feeder	epifaunal	2	1	1	4	50	6813
Liebea squamosa	Myalinida	Myalinidae	Liebea	1	Wuchiapingian		259.9	254.17	stationary, attached	suspension feeder	epifaunal	2	1	1	4	50	6813
Permophorus costatus	Cardiida	Kalenteridae	Permophorus	1	Wuchiapingian		259.9	254.17	stationary, attached	suspension feeder	semi-infaunal	2	1	2	16	50	6813
Bakevellia	Ostreida	Bakevelliidae	Bakevellia	6	Wuchiapingian		259.9	254.17	stationary	suspension feeder	semi-infaunal	2	1	2	16	50	6813
Parallelodon striatus	Arcida	Parallelodontidae	Parallelodon	4	Wuchiapingian		259.9	254.17	stationary, attached	suspension feeder	epifaunal	2	1	1	4	50	6813
Pseudomonotis (Pseudomonotis) speluncaria	Pectinida	Pseudomonotidae	Pseudomonotis (Pseudomonotis)	5	Wuchiapingian		259.9	254.17	stationary	suspension feeder	epifaunal	2	1	1	4	50	6813
Liebea squamosa	Myalinida	Myalinidae	Liebea		Wuchiapingian		259.9	254.17	stationary, attached	suspension feeder	epifaunal	2	1	1	4	50	6813
Permophorus costatus	Cardiida	Kalenteridae	Permophorus	1	Wuchiapingian		259.9	254.17	stationary, attached	suspension feeder	semi-infaunal	2	1	2	16	50	6813
Schizodus obscurus	Trigoniida	Schizodidae	Schizodus		Wuchiapingian		259.9	254.17	facultatively mobile	suspension feeder	infaunal	4	1	3	3	50	6813
Edmondia elongata	Pholadomyida	Edmondiidae	Edmondia		Wuchiapingian		259.9	254.17	facultatively mobile	suspension feeder	infaunal	4	1	3	3	50	6813
Streblopteria pusilla	Pectinida	Streblochondriidae	Streblopteria		Wuchiapingian		259.9	254.17	actively mobile	suspension feeder	nektobenthic	2	1	1	4	50	6813
Bakevellia	Ostreida	Bakevelliidae	Bakevellia	18	Wuchiapingian		259.9	254.17	stationary	suspension feeder	semi-infaunal	2	1	2	16	50	6813
Parallelodon striatus	Arcida	Parallelodontidae	Parallelodon	9	Wuchiapingian		259.9	254.17	stationary, attached	suspension feeder	epifaunal	2	1	1	4	50	6813
Permophorus costatus	Cardiida	Kalenteridae	Permophorus	1	Wuchiapingian		259.9	254.17	stationary, attached	suspension feeder	semi-infaunal	2	1	2	16	50	6813
Nuculoma	Nuculida	Nuculidae	Nuculoma	1	Late Pliensbachian		189.6	183	facultatively mobile	deposit feeder, suspension feeder	infaunal	4	2	3	10	61	6774
Palaeonucula	Nuculida	Nuculidae	Palaeonucula	8	Late Pliensbachian		189.6	183	slow motile	deposit feeder, suspension feeder	infaunal	6	2	3	2	61	6774
Rollieria	Nuculanida	Yoldiidae	Rollieria	6	Late Pliensbachian		189.6	183	facultatively mobile	deposit feeder, suspension feeder	infaunal	4	2	3	10	61	6774
Palaeoneilo galatea	Nuculanida	Malletiidae	Palaeoneilo	14	Late Pliensbachian		189.6	183	slow motile	deposit feeder, suspension feeder	infaunal	6	2	3	2	61	6774
Parallelodon	Arcida	Parallelodontidae	Parallelodon	38	Late Pliensbachian		189.6	183	stationary, attached	suspension feeder	epifaunal	2	1	1	4	61	6774
Limopsis	Arcida	Limopsidae	Limopsis	1	Late Pliensbachian		189.6	183	facultatively mobile	suspension feeder	epifaunal	4	1	1	7	61	6774
Nucinella	Solemyida	Nucinellidae	Nucinella	2	Late Pliensbachian		189.6	183	facultatively mobile	chemosymbiotic	infaunal	4	9	3	11	61	6774
Oxytoma (Oxytoma)	Pectinida	Oxytomidae	Oxytoma (Oxytoma)	5	Late Pliensbachian		189.6	183	stationary, attached	suspension feeder	epifaunal	2	1	1	4	61	6774
Anningella	Pectinida	Buchiidae	Anningella	4	Late Pliensbachian		189.6	183	stationary	suspension feeder	epifaunal	2	1	1	4	61	6774
Plicatula spinosa	Pectinida	Plicatulidae	Plicatula	2	Late Pliensbachian		189.6	183	stationary, attached, epibiont	suspension feeder	epifaunal	2	1	1	4	61	6774
Nicaniella (Nicaniella)	Carditida	Astartidae	Nicaniella (Nicaniella)	11	Late Pliensbachian		189.6	183	facultatively mobile	suspension feeder	infaunal	4	1	3	3	61	6774
Pressastarte	Carditida	Astartidae	Pressastarte	2	Late Pliensbachian		189.6	183	facultatively mobile	suspension feeder	infaunal	4	1	3	3	61	6774
Palaeonucula hammeri	Nuculida	Nuculidae	Palaeonucula	2	Late Pliensbachian		189.6	183	slow motile	deposit feeder, suspension feeder	infaunal	6	2	3	2	61	6774
Palaeonucula	Nuculida	Nuculidae	Palaeonucula	86	Late Pliensbachian		189.6	183	slow motile	deposit feeder, suspension feeder	infaunal	6	2	3	2	61	6774
Nuculana (Praesaccella)	Nuculanida	Nuculanidae	Nuculana (Praesaccella)	1	Late Pliensbachian		189.6	183	slow motile	deposit feeder, suspension feeder	infaunal	6	2	3	2	61	6774
Rollieria	Nuculanida	Yoldiidae	Rollieria	26	Late Pliensbachian		189.6	183	facultatively mobile	deposit feeder, suspension feeder	infaunal	4	2	3	10	61	6774
Rollieria	Nuculanida	Yoldiidae	Rollieria	4	Late Pliensbachian		189.6	183	facultatively mobile	deposit feeder, suspension feeder	infaunal	4	2	3	10	61	6774
Palaeoneilo galatea	Nuculanida	Malletiidae	Palaeoneilo	108	Late Pliensbachian		189.6	183	slow motile	deposit feeder, suspension feeder	infaunal	6	2	3	2	61	6774
Parallelodon	Arcida	Parallelodontidae	Parallelodon	6	Late Pliensbachian		189.6	183	stationary, attached	suspension feeder	epifaunal	2	1	1	4	61	6774
Limopsis	Arcida	Limopsidae	Limopsis	2	Late Pliensbachian		189.6	183	facultatively mobile	suspension feeder	epifaunal	4	1	1	7	61	6774
Nucinella	Solemyida	Nucinellidae	Nucinella	2	Late Pliensbachian		189.6	183	facultatively mobile	chemosymbiotic	infaunal	4	9	3	11	61	6774
Oxytoma (Oxytoma)	Pectinida	Oxytomidae	Oxytoma (Oxytoma)	3	Late Pliensbachian		189.6	183	stationary, attached	suspension feeder	epifaunal	2	1	1	4	61	6774
Anningella	Pectinida	Buchiidae	Anningella	1	Late Pliensbachian		189.6	183	stationary	suspension feeder	epifaunal	2	1	1	4	61	6774
Plicatula spinosa	Pectinida	Plicatulidae	Plicatula	1	Late Pliensbachian		189.6	183	stationary, attached, epibiont	suspension feeder	epifaunal	2	1	1	4	61	6774
Nicaniella (Nicaniella)	Carditida	Astartidae	Nicaniella (Nicaniella)	70	Late Pliensbachian		189.6	183	facultatively mobile	suspension feeder	infaunal	4	1	3	3	61	6774
Pressastarte	Carditida	Astartidae	Pressastarte	3	Late Pliensbachian		189.6	183	facultatively mobile	suspension feeder	infaunal	4	1	3	3	61	6774
Palaeonucula	Nuculida	Nuculidae	Palaeonucula	53	Late Pliensbachian		189.6	183	slow motile	deposit feeder, suspension feeder	infaunal	6	2	3	2	61	6774
Rollieria	Nuculanida	Yoldiidae	Rollieria	22	Late Pliensbachian		189.6	183	facultatively mobile	deposit feeder, suspension feeder	infaunal	4	2	3	10	61	6774
Rollieria	Nuculanida	Yoldiidae	Rollieria	5	Late Pliensbachian		189.6	183	facultatively mobile	deposit feeder, suspension feeder	infaunal	4	2	3	10	61	6774
Palaeoneilo galatea	Nuculanida	Malletiidae	Palaeoneilo	51	Late Pliensbachian		189.6	183	slow motile	deposit feeder, suspension feeder	infaunal	6	2	3	2	61	6774
Parallelodon	Arcida	Parallelodontidae	Parallelodon	12	Late Pliensbachian		189.6	183	stationary, attached	suspension feeder	epifaunal	2	1	1	4	61	6774
Limopsis	Arcida	Limopsidae	Limopsis	1	Late Pliensbachian		189.6	183	facultatively mobile	suspension feeder	epifaunal	4	1	1	7	61	6774
Limopsis (Limopsis)	Arcida	Limopsidae	Limopsis (Limopsis)	4	Late Pliensbachian		189.6	183	facultatively mobile	suspension feeder	epifaunal	4	1	1	7	61	6774
Nucinella	Solemyida	Nucinellidae	Nucinella	1	Late Pliensbachian		189.6	183	facultatively mobile	chemosymbiotic	infaunal	4	9	3	11	61	6774
Oxytoma (Oxytoma)	Pectinida	Oxytomidae	Oxytoma (Oxytoma)	3	Late Pliensbachian		189.6	183	stationary, attached	suspension feeder	epifaunal	2	1	1	4	61	6774
Anningella	Pectinida	Buchiidae	Anningella	1	Late Pliensbachian		189.6	183	stationary	suspension feeder	epifaunal	2	1	1	4	61	6774
Nicaniella (Nicaniella)	Carditida	Astartidae	Nicaniella (Nicaniella)	50	Late Pliensbachian		189.6	183	facultatively mobile	suspension feeder	infaunal	4	1	3	3	61	6774
Pressastarte	Carditida	Astartidae	Pressastarte	1	Late Pliensbachian		189.6	183	facultatively mobile	suspension feeder	infaunal	4	1	3	3	61	6774
Nuculoma	Nuculida	Nuculidae	Nuculoma	2	Late Pliensbachian		189.6	183	facultatively mobile	deposit feeder, suspension feeder	infaunal	4	2	3	10	61	6774
Palaeonucula	Nuculida	Nuculidae	Palaeonucula	6	Late Pliensbachian		189.6	183	slow motile	deposit feeder, suspension feeder	infaunal	6	2	3	2	61	6774
Rollieria	Nuculanida	Yoldiidae	Rollieria	5	Late Pliensbachian		189.6	183	facultatively mobile	deposit feeder, suspension feeder	infaunal	4	2	3	10	61	6774
Palaeoneilo galatea	Nuculanida	Malletiidae	Palaeoneilo	20	Late Pliensbachian		189.6	183	slow motile	deposit feeder, suspension feeder	infaunal	6	2	3	2	61	6774
Parallelodon	Arcida	Parallelodontidae	Parallelodon	16	Late Pliensbachian		189.6	183	stationary, attached	suspension feeder	epifaunal	2	1	1	4	61	6774
Nucinella	Solemyida	Nucinellidae	Nucinella	3	Late Pliensbachian		189.6	183	facultatively mobile	chemosymbiotic	infaunal	4	9	3	11	61	6774
Oxytoma (Oxytoma)	Pectinida	Oxytomidae	Oxytoma (Oxytoma)	1	Late Pliensbachian		189.6	183	stationary, attached	suspension feeder	epifaunal	2	1	1	4	61	6774
Plicatula spinosa	Pectinida	Plicatulidae	Plicatula	2	Late Pliensbachian		189.6	183	stationary, attached, epibiont	suspension feeder	epifaunal	2	1	1	4	61	6774
Myoconcha	Cardiida	Kalenteridae	Myoconcha	1	Late Pliensbachian		189.6	183	stationary, attached	suspension feeder	semi-infaunal	2	1	2	16	61	6774
Nicaniella (Nicaniella)	Carditida	Astartidae	Nicaniella (Nicaniella)	3	Late Pliensbachian		189.6	183	facultatively mobile	suspension feeder	infaunal	4	1	3	3	61	6774
Pressastarte	Carditida	Astartidae	Pressastarte	1	Late Pliensbachian		189.6	183	facultatively mobile	suspension feeder	infaunal	4	1	3	3	61	6774
Palaeonucula	Nuculida	Nuculidae	Palaeonucula	12	Late Pliensbachian		189.6	183	slow motile	deposit feeder, suspension feeder	infaunal	6	2	3	2	61	6774
Rollieria	Nuculanida	Yoldiidae	Rollieria	3	Late Pliensbachian		189.6	183	facultatively mobile	deposit feeder, suspension feeder	infaunal	4	2	3	10	61	6774
Rollieria	Nuculanida	Yoldiidae	Rollieria	7	Late Pliensbachian		189.6	183	facultatively mobile	deposit feeder, suspension feeder	infaunal	4	2	3	10	61	6774
Rollieria	Nuculanida	Yoldiidae	Rollieria	1	Late Pliensbachian		189.6	183	facultatively mobile	deposit feeder, suspension feeder	infaunal	4	2	3	10	61	6774
Palaeoneilo galatea	Nuculanida	Malletiidae	Palaeoneilo	27	Late Pliensbachian		189.6	183	slow motile	deposit feeder, suspension feeder	infaunal	6	2	3	2	61	6774
Parallelodon	Arcida	Parallelodontidae	Parallelodon	15	Late Pliensbachian		189.6	183	stationary, attached	suspension feeder	epifaunal	2	1	1	4	61	6774
Limopsis	Arcida	Limopsidae	Limopsis	1	Late Pliensbachian		189.6	183	facultatively mobile	suspension feeder	epifaunal	4	1	1	7	61	6774
Nucinella	Solemyida	Nucinellidae	Nucinella	1	Late Pliensbachian		189.6	183	facultatively mobile	chemosymbiotic	infaunal	4	9	3	11	61	6774
Oxytoma (Oxytoma)	Pectinida	Oxytomidae	Oxytoma (Oxytoma)	8	Late Pliensbachian		189.6	183	stationary, attached	suspension feeder	epifaunal	2	1	1	4	61	6774
Anningella	Pectinida	Buchiidae	Anningella	2	Late Pliensbachian		189.6	183	stationary	suspension feeder	epifaunal	2	1	1	4	61	6774
Schafhaeutlia	Lucinida	Lucinidae	Schafhaeutlia	1	Late Pliensbachian		189.6	183	facultatively mobile, attached	chemosymbiotic	deep infaunal	5	9	4	11	61	6774
Myoconcha	Cardiida	Kalenteridae	Myoconcha	2	Late Pliensbachian		189.6	183	stationary, attached	suspension feeder	semi-infaunal	2	1	2	16	61	6774
Nicaniella (Nicaniella)	Carditida	Astartidae	Nicaniella (Nicaniella)	19	Late Pliensbachian		189.6	183	facultatively mobile	suspension feeder	infaunal	4	1	3	3	61	6774
Pressastarte	Carditida	Astartidae	Pressastarte	4	Late Pliensbachian		189.6	183	facultatively mobile	suspension feeder	infaunal	4	1	3	3	61	6774
Palaeonucula	Nuculida	Nuculidae	Palaeonucula	6	Late Pliensbachian		189.6	183	slow motile	deposit feeder, suspension feeder	infaunal	6	2	3	2	61	6774
Palaeoneilo galatea	Nuculanida	Malletiidae	Palaeoneilo	23	Late Pliensbachian		189.6	183	slow motile	deposit feeder, suspension feeder	infaunal	6	2	3	2	61	6774
Parallelodon	Arcida	Parallelodontidae	Parallelodon	9	Late Pliensbachian		189.6	183	stationary, attached	suspension feeder	epifaunal	2	1	1	4	61	6774
Nucinella	Solemyida	Nucinellidae	Nucinella	1	Late Pliensbachian		189.6	183	facultatively mobile	chemosymbiotic	infaunal	4	9	3	11	61	6774
Oxytoma (Oxytoma)	Pectinida	Oxytomidae	Oxytoma (Oxytoma)	4	Late Pliensbachian		189.6	183	stationary, attached	suspension feeder	epifaunal	2	1	1	4	61	6774
Plicatula spinosa	Pectinida	Plicatulidae	Plicatula	2	Late Pliensbachian		189.6	183	stationary, attached, epibiont	suspension feeder	epifaunal	2	1	1	4	61	6774
Nicaniella (Nicaniella)	Carditida	Astartidae	Nicaniella (Nicaniella)	7	Late Pliensbachian		189.6	183	facultatively mobile	suspension feeder	infaunal	4	1	3	3	61	6774
Pressastarte	Carditida	Astartidae	Pressastarte	2	Late Pliensbachian		189.6	183	facultatively mobile	suspension feeder	infaunal	4	1	3	3	61	6774
Palaeonucula	Nuculida	Nuculidae	Palaeonucula	1	Late Pliensbachian		189.6	183	slow motile	deposit feeder, suspension feeder	infaunal	6	2	3	2	61	6774
Palaeoneilo galatea	Nuculanida	Malletiidae	Palaeoneilo	7	Late Pliensbachian		189.6	183	slow motile	deposit feeder, suspension feeder	infaunal	6	2	3	2	61	6774
Nucinella	Solemyida	Nucinellidae	Nucinella	2	Late Pliensbachian		189.6	183	facultatively mobile	chemosymbiotic	infaunal	4	9	3	11	61	6774
Oxytoma (Oxytoma)	Pectinida	Oxytomidae	Oxytoma (Oxytoma)	3	Late Pliensbachian		189.6	183	stationary, attached	suspension feeder	epifaunal	2	1	1	4	61	6774
Parainoceramya dubia	Myalinida	Inoceramidae	Parainoceramya		Toarcian		182.7	174.1	facultatively mobile	suspension feeder	epifaunal	4	1	1	7	62	6968
Gryphaea (Catinula) crickleyensis	Ostreida	Gryphaeidae	Gryphaea (Catinula)	2	Early Toarcian		183	182	stationary, attached	suspension feeder	epifaunal	2	1	1	4	62	7068
Cosmetodon	Arcida	Parallelodontidae	Cosmetodon	2	Early Toarcian		183	182	facultatively mobile, attached	suspension feeder	low-level epifaunal	5	1	1	19	62	7068
Gryphaea (Bilobissa) sublobata	Ostreida	Gryphaeidae	Gryphaea (Bilobissa)	13	Early Toarcian		183	182	stationary, attached	suspension feeder	epifaunal	2	1	1	4	62	7068
Limea (Pseudolimea) roemeri	Pectinida	Limidae	Pseudolimea	4	Early Toarcian		183	182	stationary, attached	suspension feeder	low-level epifaunal	2	1	1	4	62	7068
Lycettia lunularis	Mytilida	Mytilidae	Lycettia	7	Early Toarcian		183	182	stationary, attached	suspension feeder	epifaunal	2	1	1	4	62	7068
Nicaniella (Nicaniella) voltzi	Carditida	Astartidae	Nicaniella (Nicaniella)	5	Early Toarcian		183	182	facultatively mobile	suspension feeder	infaunal	4	1	3	3	62	7068
Pachymya	Pholadomyida	Pholadomyidae	Pachymya	1	Early Toarcian		183	182	facultatively mobile	suspension feeder	deep infaunal	4	1	4	14	62	7068
Plicatula (Harpax) spinosa	Pectinida	Plicatulidae	Plicatula (Harpax)	5	Early Toarcian		183	182	stationary, attached, epibiont	suspension feeder	epifaunal	2	1	1	4	62	7068
Protocardia striatula	Cardiida	Cardiidae	Protocardia	5	Early Toarcian		183	182	facultatively mobile	suspension feeder	infaunal	4	1	3	3	62	7068
Protocardia	Cardiida	Cardiidae	Protocardia	4	Early Toarcian		183	182	facultatively mobile	suspension feeder	infaunal	4	1	3	3	62	7068
Pecten (Pecten) dentatus	Pectinida	Pectinidae	Pecten (Pecten)	1	Early Toarcian		183	182	facultatively mobile	suspension feeder	epifaunal	4	1	1	7	62	7068
Gryphaea (Catinula) crickleyensis	Ostreida	Gryphaeidae	Gryphaea (Catinula)	5	Early Toarcian		183	182	stationary, attached	suspension feeder	epifaunal	2	1	1	4	62	7068
Cosmetodon	Arcida	Parallelodontidae	Cosmetodon	9	Early Toarcian		183	182	facultatively mobile, attached	suspension feeder	low-level epifaunal	5	1	1	19	62	7068
Grammatodon concinnus	Arcida	Parallelodontidae	Grammatodon	6	Early Toarcian		183	182	stationary, attached	suspension feeder	epifaunal	2	1	1	4	62	7068
Gryphaea (Bilobissa) sublobata	Ostreida	Gryphaeidae	Gryphaea (Bilobissa)	16	Early Toarcian		183	182	stationary, attached	suspension feeder	epifaunal	2	1	1	4	62	7068
Limea (Pseudolimea) roemeri	Pectinida	Limidae	Pseudolimea	2	Early Toarcian		183	182	stationary, attached	suspension feeder	low-level epifaunal	2	1	1	4	62	7068
Lycettia lunularis	Mytilida	Mytilidae	Lycettia	10	Early Toarcian		183	182	stationary, attached	suspension feeder	epifaunal	2	1	1	4	62	7068
Nicaniella (Nicaniella) voltzi	Carditida	Astartidae	Nicaniella (Nicaniella)	8	Early Toarcian		183	182	facultatively mobile	suspension feeder	infaunal	4	1	3	3	62	7068
Nicaniella (Nicaniella)	Carditida	Astartidae	Nicaniella (Nicaniella)	5	Early Toarcian		183	182	facultatively mobile	suspension feeder	infaunal	4	1	3	3	62	7068
Nuculana	Nuculanida	Nuculanidae	Nuculana	1	Early Toarcian		183	182	slow motile	deposit feeder, suspension feeder	infaunal	6	2	3	2	62	7068
Pachymya	Pholadomyida	Pholadomyidae	Pachymya	18	Early Toarcian		183	182	facultatively mobile	suspension feeder	deep infaunal	4	1	4	14	62	7068
Plicatula (Harpax) spinosa	Pectinida	Plicatulidae	Plicatula (Harpax)	2	Early Toarcian		183	182	stationary, attached, epibiont	suspension feeder	epifaunal	2	1	1	4	62	7068
Protocardia striatula	Cardiida	Cardiidae	Protocardia	13	Early Toarcian		183	182	facultatively mobile	suspension feeder	infaunal	4	1	3	3	62	7068
Protocardia	Cardiida	Cardiidae	Protocardia	6	Early Toarcian		183	182	facultatively mobile	suspension feeder	infaunal	4	1	3	3	62	7068
Weyla pradoanus	Pectinida	Neitheidae	Weyla	1	Early Toarcian		183	182	stationary, unattached	suspension feeder	semi-infaunal	1	1	2	20	62	7068
Gryphaea (Catinula) crickleyensis	Ostreida	Gryphaeidae	Gryphaea (Catinula)	4	Early Toarcian		183	182	stationary, attached	suspension feeder	epifaunal	2	1	1	4	62	7068
Cosmetodon	Arcida	Parallelodontidae	Cosmetodon	1	Early Toarcian		183	182	facultatively mobile, attached	suspension feeder	low-level epifaunal	5	1	1	19	62	7068
Grammatodon concinnus	Arcida	Parallelodontidae	Grammatodon	1	Early Toarcian		183	182	stationary, attached	suspension feeder	epifaunal	2	1	1	4	62	7068
Gryphaea (Bilobissa) sublobata	Ostreida	Gryphaeidae	Gryphaea (Bilobissa)	42	Early Toarcian		183	182	stationary, attached	suspension feeder	epifaunal	2	1	1	4	62	7068
Limea (Pseudolimea) roemeri	Pectinida	Limidae	Pseudolimea	1	Early Toarcian		183	182	stationary, attached	suspension feeder	low-level epifaunal	2	1	1	4	62	7068
Lima (Mantellum) duplicata	Pectinida	Limidae	Lima (Mantellum)	2	Early Toarcian		183	182	facultatively mobile	suspension feeder	epifaunal	2	1	1	4	62	7068
Lithophaga (Lithophaga)	Mytilida	Mytilidae	Lithophaga (Lithophaga)	1	Early Toarcian		183	182	stationary, attached	suspension feeder	boring	2	1	2	16	62	7068
Pachymya	Pholadomyida	Pholadomyidae	Pachymya	9	Early Toarcian		183	182	facultatively mobile	suspension feeder	deep infaunal	4	1	4	14	62	7068
Plicatula (Harpax) spinosa	Pectinida	Plicatulidae	Plicatula (Harpax)	4	Early Toarcian		183	182	stationary, attached, epibiont	suspension feeder	epifaunal	2	1	1	4	62	7068
Protocardia striatula	Cardiida	Cardiidae	Protocardia	6	Early Toarcian		183	182	facultatively mobile	suspension feeder	infaunal	4	1	3	3	62	7068
Pecten (Pecten) dentatus	Pectinida	Pectinidae	Pecten (Pecten)	2	Early Toarcian		183	182	facultatively mobile	suspension feeder	epifaunal	4	1	1	7	62	7068
Coelopis (Coelopis) parvocardinata	Carditida	Astartidae	Coelopis (Coelopis)	1	Early Toarcian		183	182	slow motile	suspension feeder	infaunal	6	1	3	17	62	7068
Corbulomima obscura	Pholadida	Corbulidae	Corbulomima	27	Early Toarcian		183	182	facultatively mobile, attached	suspension feeder	infaunal	5	1	3	5	62	7068
Grammatodon concinnus	Arcida	Parallelodontidae	Grammatodon	1	Early Toarcian		183	182	stationary, attached	suspension feeder	epifaunal	2	1	1	4	62	7068
Gryphaea (Bilobissa) sublobata	Ostreida	Gryphaeidae	Gryphaea (Bilobissa)	15	Early Toarcian		183	182	stationary, attached	suspension feeder	epifaunal	2	1	1	4	62	7068
Inoperna sowerbiana	Mytilida	Mytilidae	Inoperna	1	Early Toarcian		183	182	stationary, attached	suspension feeder	epifaunal	2	1	1	4	62	7068
Isocyprina	Veneroidei	Arcticidae	Isocyprina	3	Early Toarcian		183	182	facultatively mobile	suspension feeder	infaunal	4	1	3	3	62	7068
Nicaniella (Nicaniella) voltzi	Carditida	Astartidae	Nicaniella (Nicaniella)	3	Early Toarcian		183	182	facultatively mobile	suspension feeder	infaunal	4	1	3	3	62	7068
Nicaniella (Nicaniella)	Carditida	Astartidae	Nicaniella (Nicaniella)	2	Early Toarcian		183	182	facultatively mobile	suspension feeder	infaunal	4	1	3	3	62	7068
Pinna (Pinna) folium	Ostreida	Pinnidae	Pinna (Pinna)	23	Early Toarcian		183	182	stationary, attached	suspension feeder	semi-infaunal	2	1	2	16	62	7068
Plagiostoma	Pectinida	Limidae	Plagiostoma	1	Early Toarcian		183	182	stationary, attached	suspension feeder	low-level epifaunal	2	1	1	4	62	7068
Plicatula (Harpax) spinosa	Pectinida	Plicatulidae	Plicatula (Harpax)	1	Early Toarcian		183	182	stationary, attached, epibiont	suspension feeder	epifaunal	2	1	1	4	62	7068
Protocardia striatula	Cardiida	Cardiidae	Protocardia	2	Early Toarcian		183	182	facultatively mobile	suspension feeder	infaunal	4	1	3	3	62	7068
Gryphaea (Catinula) crickleyensis	Ostreida	Gryphaeidae	Gryphaea (Catinula)	1	Early Toarcian		183	182	stationary, attached	suspension feeder	epifaunal	2	1	1	4	62	7068
Ctenostreon	Pectinida	Limidae	Ctenostreon	1	Early Toarcian		183	182	stationary, attached	suspension feeder	low-level epifaunal	2	1	1	4	62	7068
Gryphaea (Bilobissa) sublobata	Ostreida	Gryphaeidae	Gryphaea (Bilobissa)	86	Early Toarcian		183	182	stationary, attached	suspension feeder	epifaunal	2	1	1	4	62	7068
Placunopsis striatula	Pectinida	Anomiidae	Placunopsis	1	Early Toarcian		183	182	stationary, attached	suspension feeder	epifaunal, gregarious	2	1	1	4	62	7068
Harpax rapa	Pectinida	Plicatulidae	Harpax	1	Early Toarcian		183	182	cemented	suspension feeder	epifaunal	3	1	1	1	62	7068
Pecten (Pecten) dentatus	Pectinida	Pectinidae	Pecten (Pecten)	3	Early Toarcian		183	182	facultatively mobile	suspension feeder	epifaunal	4	1	1	7	62	7068
Arcomytilus asper	Mytilida	Mytilidae	Arcomytilus	1	Early Toarcian		183	182	stationary, attached	suspension feeder	epifaunal	2	1	1	4	62	7068
Gryphaea (Bilobissa) sublobata	Ostreida	Gryphaeidae	Gryphaea (Bilobissa)	17	Early Toarcian		183	182	stationary, attached	suspension feeder	epifaunal	2	1	1	4	62	7068
Limea (Pseudolimea) cristata	Pectinida	Limidae	Pseudolimea	1	Early Toarcian		183	182	stationary, attached	suspension feeder	low-level epifaunal	2	1	1	4	62	7068
Lima (Mantellum) duplicata	Pectinida	Limidae	Lima (Mantellum)	1	Early Toarcian		183	182	facultatively mobile	suspension feeder	epifaunal	2	1	1	4	62	7068
Nanogyra monoptera	Ostreida	Gryphaeidae	Nanogyra	3	Early Toarcian		183	182	stationary, attached	suspension feeder	epifaunal	2	1	1	4	62	7068
Nicaniella (Nicaniella) voltzi	Carditida	Astartidae	Nicaniella (Nicaniella)	2	Early Toarcian		183	182	facultatively mobile	suspension feeder	infaunal	4	1	3	3	62	7068
Pinna (Pinna) folium	Ostreida	Pinnidae	Pinna (Pinna)	5	Early Toarcian		183	182	stationary, attached	suspension feeder	semi-infaunal	2	1	2	16	62	7068
Plicatula (Harpax) spinosa	Pectinida	Plicatulidae	Plicatula (Harpax)	4	Early Toarcian		183	182	stationary, attached, epibiont	suspension feeder	epifaunal	2	1	1	4	62	7068
Protocardia striatula	Cardiida	Cardiidae	Protocardia	1	Early Toarcian		183	182	facultatively mobile	suspension feeder	infaunal	4	1	3	3	62	7068
Pecten (Pecten) dentatus	Pectinida	Pectinidae	Pecten (Pecten)	2	Early Toarcian		183	182	facultatively mobile	suspension feeder	epifaunal	4	1	1	7	62	7068
Eopecten velatus	Pectinida	Pectinidae	Eopecten	1	Early Toarcian		183	182	stationary, attached	suspension feeder	low-level epifaunal	2	1	1	4	62	7068
Gryphaea (Bilobissa) sublobata	Ostreida	Gryphaeidae	Gryphaea (Bilobissa)	38	Early Toarcian		183	182	stationary, attached	suspension feeder	epifaunal	2	1	1	4	62	7068
Modiolus gerthi	Mytilida	Mytilidae	Modiolus	2	Early Toarcian		183	182	stationary, attached, epibiont	suspension feeder	semi-infaunal	2	1	2	16	62	7068
Nicaniella (Nicaniella) voltzi	Carditida	Astartidae	Nicaniella (Nicaniella)	2	Early Toarcian		183	182	facultatively mobile	suspension feeder	infaunal	4	1	3	3	62	7068
Pinna (Pinna) folium	Ostreida	Pinnidae	Pinna (Pinna)	3	Early Toarcian		183	182	stationary, attached	suspension feeder	semi-infaunal	2	1	2	16	62	7068
Plicatula (Harpax) spinosa	Pectinida	Plicatulidae	Plicatula (Harpax)	3	Early Toarcian		183	182	stationary, attached, epibiont	suspension feeder	epifaunal	2	1	1	4	62	7068
Pronoella	Veneroidei	Arcticidae	Pronoella	1	Early Toarcian		183	182	facultatively mobile	suspension feeder	infaunal	4	1	3	3	62	7068
Pecten (Pecten) dentatus	Pectinida	Pectinidae	Pecten (Pecten)	5	Early Toarcian		183	182	facultatively mobile	suspension feeder	epifaunal	4	1	1	7	62	7068
Pseudotrapezium	Veneroidei	Arcticidae	Pseudotrapezium	1	Early Toarcian		183	182	facultatively mobile	suspension feeder	infaunal	4	1	3	3	62	7068
Coelopis (Coelopis)	Carditida	Astartidae	Coelopis (Coelopis)	1	Early Toarcian		183	182	slow motile	suspension feeder	infaunal	6	1	3	17	62	7068
Eopecten velatus	Pectinida	Pectinidae	Eopecten	1	Early Toarcian		183	182	stationary, attached	suspension feeder	low-level epifaunal	2	1	1	4	62	7068
Grammatodon concinnus	Arcida	Parallelodontidae	Grammatodon	2	Early Toarcian		183	182	stationary, attached	suspension feeder	epifaunal	2	1	1	4	62	7068
Gryphaea (Bilobissa) sublobata	Ostreida	Gryphaeidae	Gryphaea (Bilobissa)	26	Early Toarcian		183	182	stationary, attached	suspension feeder	epifaunal	2	1	1	4	62	7068
Inoperna sowerbiana	Mytilida	Mytilidae	Inoperna	2	Early Toarcian		183	182	stationary, attached	suspension feeder	epifaunal	2	1	1	4	62	7068
Lima (Mantellum) duplicata	Pectinida	Limidae	Lima (Mantellum)	1	Early Toarcian		183	182	facultatively mobile	suspension feeder	epifaunal	2	1	1	4	62	7068
Modiolus gerthi	Mytilida	Mytilidae	Modiolus	2	Early Toarcian		183	182	stationary, attached, epibiont	suspension feeder	semi-infaunal	2	1	2	16	62	7068
Nanogyra monoptera	Ostreida	Gryphaeidae	Nanogyra	1	Early Toarcian		183	182	stationary, attached	suspension feeder	epifaunal	2	1	1	4	62	7068
Nicaniella (Nicaniella) voltzi	Carditida	Astartidae	Nicaniella (Nicaniella)	4	Early Toarcian		183	182	facultatively mobile	suspension feeder	infaunal	4	1	3	3	62	7068
Nicaniella (Nicaniella)	Carditida	Astartidae	Nicaniella (Nicaniella)	2	Early Toarcian		183	182	facultatively mobile	suspension feeder	infaunal	4	1	3	3	62	7068
Nuculana	Nuculanida	Nuculanidae	Nuculana	1	Early Toarcian		183	182	slow motile	deposit feeder, suspension feeder	infaunal	6	2	3	2	62	7068
Pachymya	Pholadomyida	Pholadomyidae	Pachymya	3	Early Toarcian		183	182	facultatively mobile	suspension feeder	deep infaunal	4	1	4	14	62	7068
Plagiostoma punctatum	Pectinida	Limidae	Plagiostoma	1	Early Toarcian		183	182	stationary, attached	suspension feeder	low-level epifaunal	2	1	1	4	62	7068
Pronoella	Veneroidei	Arcticidae	Pronoella	1	Early Toarcian		183	182	facultatively mobile	suspension feeder	infaunal	4	1	3	3	62	7068
Protocardia striatula	Cardiida	Cardiidae	Protocardia	3	Early Toarcian		183	182	facultatively mobile	suspension feeder	infaunal	4	1	3	3	62	7068
Pecten (Pecten) dentatus	Pectinida	Pectinidae	Pecten (Pecten)	3	Early Toarcian		183	182	facultatively mobile	suspension feeder	epifaunal	4	1	1	7	62	7068
Halobia	Ostreida	Halobiidae	Halobia		Ladinian		242	237	facultatively mobile, attached	suspension feeder	epifaunal	5	1	1	19	55	7116
Halobia subcomata	Ostreida	Halobiidae	Halobia		Ladinian		242	237	facultatively mobile, attached	suspension feeder	epifaunal	5	1	1	19	55	7116
Entolium	Pectinida	Entoliidae	Entolium		Ladinian		242	237	facultatively mobile, unattached	suspension feeder	epifaunal	4	1	1	7	55	7116
Entolium subdemissum	Pectinida	Entoliidae	Entolium		Ladinian		242	237	facultatively mobile, unattached	suspension feeder	epifaunal	4	1	1	7	55	7116
Palaeoneilo	Nuculanida	Malletiidae	Palaeoneilo		Ladinian		242	237	slow motile	deposit feeder, suspension feeder	infaunal	6	2	3	2	55	7116
Pichleria	Cyrtodontida	Pichleriidae	Pichleria		Ladinian		242	237	stationary, attached	suspension feeder	semi-infaunal	2	1	2	16	55	7116
Plagiostoma	Pectinida	Limidae	Plagiostoma		Ladinian		242	237	stationary, attached	suspension feeder	low-level epifaunal	2	1	1	4	55	7116
Myophoria vulgaris	Trigoniida	Myophoriidae	Myophoria		Ladinian		242	237	facultatively mobile	suspension feeder	infaunal	4	1	3	3	55	7116
Hoernesia	Ostreida	Bakevelliidae	Hoernesia		Ladinian		242	237	stationary, attached, epibiont	suspension feeder	semi-infaunal	2	1	2	16	55	7116
Pinna	Ostreida	Pinnidae	Pinna		Ladinian		242	237	stationary, attached	suspension feeder	semi-infaunal	2	1	2	16	55	7116
Pleuromya	Pholadida	Pleuromyidae	Pleuromya		Ladinian		242	237	facultatively mobile	suspension feeder	deep infaunal	4	1	4	14	55	7116
Lima	Pectinida	Limidae	Lima		Ladinian		242	237	facultatively mobile	suspension feeder	epifaunal	2	1	1	4	55	7116
Nucula	Nuculida	Nuculidae	Nucula		Ladinian		242	237	slow motile	deposit feeder, suspension feeder	infaunal	6	2	3	2	55	7116
Chlamys	Pectinida	Pectinidae	Chlamys		Ladinian		242	237	facultatively mobile, unattached	suspension feeder	epifaunal	4	1	1	7	55	7116
Parvamussium	Pectinida	Propeamussiidae	Parvamussium		Ladinian		242	237	facultatively mobile, unattached	carnivore	epifaunal	4	6	1	9	55	7116
Mysidioptera	Pectinida	Limidae	Mysidioptera		Ladinian		242	237	stationary, attached	suspension feeder	low-level epifaunal	2	1	1	4	55	7116
Palaeonucula strigilata	Nuculida	Nuculidae	Palaeonucula		Ladinian		242	237	slow motile	deposit feeder, suspension feeder	infaunal	6	2	3	2	55	7116
Pseudocorbula nuculiformis	Carditida	Myophoricardiidae	Pseudocorbula		Ladinian		242	237	slow motile	suspension feeder	shallow infaunal	6	1	3	17	55	7116
Bakevellia	Ostreida	Bakevelliidae	Bakevellia		Ladinian		242	237	stationary	suspension feeder	semi-infaunal	2	1	2	16	55	7116
Liostrea	Ostreida	Gryphaeidae	Liostrea		Ladinian		242	237	cemented	suspension feeder	epifaunal	3	1	1	1	55	7116
Homomya	Pholadomyida	Pholadomyidae	Homomya		Ladinian		242	237	facultatively mobile	suspension feeder	deep infaunal	4	1	3	3	55	7116
Halobia yandongensis	Ostreida	Halobiidae	Halobia		Lacian	Alaunian	221.5	212	facultatively mobile, attached	suspension feeder	epifaunal	5	1	1	19	57	7116
Halobia norica	Ostreida	Halobiidae	Halobia		Lacian	Alaunian	221.5	212	facultatively mobile, attached	suspension feeder	epifaunal	5	1	1	19	57	7116
Halobia partschi	Ostreida	Halobiidae	Halobia		Lacian	Alaunian	221.5	212	facultatively mobile, attached	suspension feeder	epifaunal	5	1	1	19	57	7116
Halobia	Ostreida	Halobiidae	Halobia		Lacian	Alaunian	221.5	212	facultatively mobile, attached	suspension feeder	epifaunal	5	1	1	19	57	7116
Halobia plicosa	Ostreida	Halobiidae	Halobia		Lacian	Alaunian	221.5	212	facultatively mobile, attached	suspension feeder	epifaunal	5	1	1	19	57	7116
Halobia maximiliani	Ostreida	Halobiidae	Halobia		Lacian	Alaunian	221.5	212	facultatively mobile, attached	suspension feeder	epifaunal	5	1	1	19	57	7116
Halobia	Ostreida	Halobiidae	Halobia		Lacian	Alaunian	221.5	212	facultatively mobile, attached	suspension feeder	epifaunal	5	1	1	19	57	7116
Halobia neumayri	Ostreida	Halobiidae	Halobia		Lacian	Alaunian	221.5	212	facultatively mobile, attached	suspension feeder	epifaunal	5	1	1	19	57	7116
Halobia fallax	Ostreida	Halobiidae	Halobia		Lacian	Alaunian	221.5	212	facultatively mobile, attached	suspension feeder	epifaunal	5	1	1	19	57	7116
Halobia superbescens	Ostreida	Halobiidae	Halobia		Lacian	Alaunian	221.5	212	facultatively mobile, attached	suspension feeder	epifaunal	5	1	1	19	57	7116
Nuculana	Nuculanida	Nuculanidae	Nuculana		Lacian	Alaunian	221.5	212	slow motile	deposit feeder, suspension feeder	infaunal	6	2	3	2	57	7116
Nuculana	Nuculanida	Nuculanidae	Nuculana		Lacian	Alaunian	221.5	212	slow motile	deposit feeder, suspension feeder	infaunal	6	2	3	2	57	7116
Nuculana alpina	Nuculanida	Nuculanidae	Nuculana		Lacian	Alaunian	221.5	212	slow motile	deposit feeder, suspension feeder	infaunal	6	2	3	2	57	7116
Nuculana	Nuculanida	Nuculanidae	Nuculana		Lacian	Alaunian	221.5	212	slow motile	deposit feeder, suspension feeder	infaunal	6	2	3	2	57	7116
Posidonia	Ostreida	Posidoniidae	Posidonia		Lacian	Alaunian	221.5	212	stationary, unattached	suspension feeder	epifaunal	1	1	1	12	57	7116
Burmesia lirata	Thraciida	Burmesiidae	Burmesia		Lacian	Alaunian	221.5	212	facultatively mobile	suspension feeder	deep infaunal	4	1	4	14	57	7116
Catella	Arcida	Parallelodontidae	Catella		Lacian	Alaunian	221.5	212	facultatively mobile, attached	suspension feeder	low-level epifaunal	5	1	1	19	57	7116
Pseudolimea	Pectinida	Limidae	Pseudolimea		Lacian	Alaunian	221.5	212	stationary, attached	suspension feeder	low-level epifaunal	2	1	1	4	57	7116
Palaeoneilo elliptica	Nuculanida	Malletiidae	Palaeoneilo		Lacian	Alaunian	221.5	212	slow motile	deposit feeder, suspension feeder	infaunal	6	2	3	2	57	7116
Palaeoneilo praeacuta	Nuculanida	Malletiidae	Palaeoneilo		Lacian	Alaunian	221.5	212	slow motile	deposit feeder, suspension feeder	infaunal	6	2	3	2	57	7116
Pseudolimea duplicata	Pectinida	Limidae	Pseudolimea		Lacian	Alaunian	221.5	212	stationary, attached	suspension feeder	low-level epifaunal	2	1	1	4	57	7116
Krumbeckiella	Ostreida	Pergamidiidae	Krumbeckiella		Lacian	Alaunian	221.5	212	stationary, attached, epibiont	suspension feeder	epifaunal	2	1	1	4	57	7116
Plagiostoma	Pectinida	Limidae	Plagiostoma		Lacian	Alaunian	221.5	212	stationary, attached	suspension feeder	low-level epifaunal	2	1	1	4	57	7116
Plagiostoma	Pectinida	Limidae	Plagiostoma		Lacian	Alaunian	221.5	212	stationary, attached	suspension feeder	low-level epifaunal	2	1	1	4	57	7116
Cassianella	Ostreida	Cassianellidae	Cassianella		Lacian	Alaunian	221.5	212	stationary, unattached	suspension feeder	epifaunal	1	1	1	12	57	7116
Cassianella	Ostreida	Cassianellidae	Cassianella		Lacian	Alaunian	221.5	212	stationary, unattached	suspension feeder	epifaunal	1	1	1	12	57	7116
Cassianella	Ostreida	Cassianellidae	Cassianella		Lacian	Alaunian	221.5	212	stationary, unattached	suspension feeder	epifaunal	1	1	1	12	57	7116
Unionites manmuensis	Cardiida	Anthracosiidae	Unionites		Lacian	Alaunian	221.5	212	facultatively mobile, unattached	suspension feeder	shallow infaunal	4	1	3	3	57	7116
Unionites	Cardiida	Anthracosiidae	Unionites		Lacian	Alaunian	221.5	212	facultatively mobile, unattached	suspension feeder	shallow infaunal	4	1	3	3	57	7116
Unionites	Cardiida	Anthracosiidae	Unionites		Lacian	Alaunian	221.5	212	facultatively mobile, unattached	suspension feeder	shallow infaunal	4	1	3	3	57	7116
Unionites griesbachi	Cardiida	Anthracosiidae	Unionites		Lacian	Alaunian	221.5	212	facultatively mobile, unattached	suspension feeder	shallow infaunal	4	1	3	3	57	7116
Palaeonucula strigilata	Nuculida	Nuculidae	Palaeonucula		Lacian	Alaunian	221.5	212	slow motile	deposit feeder, suspension feeder	infaunal	6	2	3	2	57	7116
Hoferia	Cyrtodontida	Pichleriidae	Hoferia		Lacian	Alaunian	221.5	212	facultatively mobile, attached	suspension feeder	epifaunal	5	1	1	19	57	7116
Palaeocardita	Cardiida	Palaeocarditidae	Palaeocardita		Lacian	Alaunian	221.5	212	stationary, attached	suspension feeder	semi-infaunal	2	1	2	16	57	7116
Cardium	Cardiida	Cardiidae	Cardium		Lacian	Alaunian	221.5	212	facultatively mobile	suspension feeder	infaunal	4	1	3	3	57	7116
Entolium	Pectinida	Entoliidae	Entolium		Lacian	Alaunian	221.5	212	facultatively mobile, unattached	suspension feeder	epifaunal	4	1	1	7	57	7116
Myophoria	Trigoniida	Myophoriidae	Myophoria		Lacian	Alaunian	221.5	212	facultatively mobile	suspension feeder	infaunal	4	1	3	3	57	7116
Amonotis	Ostreida	Posidoniidae	Amonotis		Lacian	Alaunian	221.5	212	stationary	suspension feeder	epifaunal	2	1	1	4	57	7116
Pergamidia	Ostreida	Pergamidiidae	Pergamidia		Lacian	Alaunian	221.5	212	stationary, attached, epibiont	suspension feeder	epifaunal	2	1	1	4	57	7116
Parallelodon	Arcida	Parallelodontidae	Parallelodon		Lacian	Alaunian	221.5	212	stationary, attached	suspension feeder	epifaunal	2	1	1	4	57	7116
Bakevellia (Bakevelloides) praecursor	Ostreida	Bakevelliidae	Bakevellia (Bakevelloides)		Lacian	Alaunian	221.5	212	stationary	suspension feeder	semi-infaunal	2	1	2	16	57	7116
Myophoria chenopus	Trigoniida	Myophoriidae	Myophoria		Lacian	Alaunian	221.5	212	facultatively mobile	suspension feeder	infaunal	4	1	3	3	57	7116
Thracia prisca	Thraciida	Thraciidae	Thracia		Lacian	Alaunian	221.5	212	facultatively mobile	suspension feeder	deep infaunal	4	1	4	14	57	7116
Schafhaeutlia	Lucinida	Lucinidae	Schafhaeutlia		Lacian	Alaunian	221.5	212	facultatively mobile, attached	chemosymbiotic	deep infaunal	4	9	4	11	57	7116
Halobia miesenbachensis	Ostreida	Halobiidae	Halobia		Carnian		237	228	facultatively mobile, attached	suspension feeder	epifaunal	5	1	1	19	56	7116
Halobia cordillerana	Ostreida	Halobiidae	Halobia		Carnian		237	228	facultatively mobile, attached	suspension feeder	epifaunal	5	1	1	19	56	7116
Pteria	Ostreida	Pteriidae	Pteria		Carnian		237	228	stationary, attached	suspension feeder	epifaunal	2	1	1	4	56	7116
Chlamys	Pectinida	Pectinidae	Chlamys		Carnian		237	228	facultatively mobile, unattached	suspension feeder	epifaunal	4	1	1	7	56	7116
Amonotis rothpletzi	Ostreida	Posidoniidae	Amonotis		Carnian		237	228	stationary	suspension feeder	epifaunal	2	1	1	4	56	7116
Catella	Arcida	Parallelodontidae	Catella		Carnian		237	228	facultatively mobile, attached	suspension feeder	low-level epifaunal	5	1	1	19	56	7116
Myophoria (Costatoria) minor	Trigoniida	Myophoriidae	Costatoria		Carnian		237	228	facultatively mobile	suspension feeder	infaunal	4	1	3	3	56	7116
Myophoricardium	Carditida	Myophoricardiidae	Myophoricardium		Carnian		237	228	slow motile	suspension feeder	shallow infaunal	6	1	3	17	56	7116
Pichleria auingeri	Cyrtodontida	Pichleriidae	Pichleria		Carnian		237	228	stationary, attached	suspension feeder	semi-infaunal	2	1	2	16	56	7116
Pergamidia timorensis	Ostreida	Pergamidiidae	Pergamidia		Carnian		237	228	stationary, attached, epibiont	suspension feeder	epifaunal	2	1	1	4	56	7116
Palaeocardita	Cardiida	Palaeocarditidae	Palaeocardita		Carnian		237	228	stationary, attached	suspension feeder	semi-infaunal	2	1	2	16	56	7116
Palaeoneilo elliptica	Nuculanida	Malletiidae	Palaeoneilo		Carnian		237	228	slow motile	deposit feeder, suspension feeder	infaunal	6	2	3	2	56	7116
Pomarangina	Megalodontida	Megalodontidae	Pomarangina		Carnian		237	228	stationary, unattached	suspension feeder	semi-infaunal	2	1	2	16	56	7116
Modiolus pygmaeus	Mytilida	Mytilidae	Modiolus		Carnian		237	228	stationary, attached, epibiont	suspension feeder	semi-infaunal	2	1	2	16	56	7116
Schafhaeutlia	Lucinida	Lucinidae	Schafhaeutlia		Carnian		237	228	facultatively mobile, attached	chemosymbiotic	deep infaunal	4	9	4	11	56	7116
Posidonia	Ostreida	Posidoniidae	Posidonia		Carnian		237	228	stationary, unattached	suspension feeder	epifaunal	1	1	1	12	56	7116
Chlamys	Pectinida	Pectinidae	Chlamys		Carnian		237	228	facultatively mobile, unattached	suspension feeder	epifaunal	4	1	1	7	56	7116
Badiotella	Pectinida	Limidae	Badiotella		Carnian		237	228	stationary, attached	suspension feeder	low-level epifaunal	2	1	1	4	56	7116
Pleuromya	Pholadida	Pleuromyidae	Pleuromya		Carnian		237	228	facultatively mobile	suspension feeder	deep infaunal	4	1	4	14	56	7116
Myophoriopis	Carditida	Myophoricardiidae	Myophoriopis		Carnian		237	228	slow motile	suspension feeder	shallow infaunal	6	1	3	17	56	7116
Palaeonucula strigilata	Nuculida	Nuculidae	Palaeonucula		Carnian		237	228	slow motile	deposit feeder, suspension feeder	infaunal	6	2	3	2	56	7116
Asoella	Pectinida	Hunanopectinidae	Asoella		Carnian		237	228	stationary	suspension feeder	epifaunal	2	1	1	4	56	7116
Pseudocardita	Cardiida	Cardiidae	Pseudocardita		Carnian		237	228	facultatively mobile	suspension feeder	infaunal	4	1	3	3	56	7116
Atreta	Pectinida	Dimyidae	Atreta	1	Early Toarcian		183	182	cemented	suspension feeder	epifaunal	3	1	1	1	62	7068
Gryphaea (Catinula) crickleyensis	Ostreida	Gryphaeidae	Gryphaea (Catinula)	2	Early Toarcian		183	182	stationary, attached	suspension feeder	epifaunal	2	1	1	4	62	7068
Ceratomya concentrica	Pholadida	Ceratomyidae	Ceratomya	5	Early Toarcian		183	182	facultatively mobile	suspension feeder	infaunal	4	1	3	3	62	7068
Coelopis (Coelopis) parvocardinata	Carditida	Astartidae	Coelopis (Coelopis)	2	Early Toarcian		183	182	slow motile	suspension feeder	infaunal	6	1	3	17	62	7068
Coelopis (Coelopis)	Carditida	Astartidae	Coelopis (Coelopis)	1	Early Toarcian		183	182	slow motile	suspension feeder	infaunal	6	1	3	17	62	7068
Grammatodon concinnus	Arcida	Parallelodontidae	Grammatodon	7	Early Toarcian		183	182	stationary, attached	suspension feeder	epifaunal	2	1	1	4	62	7068
Gryphaea (Bilobissa)	Ostreida	Gryphaeidae	Gryphaea (Bilobissa)	26	Early Toarcian		183	182	stationary, attached	suspension feeder	epifaunal	2	1	1	4	62	7068
Inoperna sowerbiana	Mytilida	Mytilidae	Inoperna	2	Early Toarcian		183	182	stationary, attached	suspension feeder	epifaunal	2	1	1	4	62	7068
Mesomiltha	Lucinida	Lucinidae	Mesomiltha	1	Early Toarcian		183	182	facultatively mobile	chemosymbiotic, suspension feeder	infaunal	4	9	3	11	62	7068
Modiolus gerthi	Mytilida	Mytilidae	Modiolus	7	Early Toarcian		183	182	stationary, attached, epibiont	suspension feeder	semi-infaunal	2	1	2	16	62	7068
Nanogyra monoptera	Ostreida	Gryphaeidae	Nanogyra	3	Early Toarcian		183	182	stationary, attached	suspension feeder	epifaunal	2	1	1	4	62	7068
Nicaniella (Nicaniella) voltzi	Carditida	Astartidae	Nicaniella (Nicaniella)	5	Early Toarcian		183	182	facultatively mobile	suspension feeder	infaunal	4	1	3	3	62	7068
Nicaniella (Nicaniella)	Carditida	Astartidae	Nicaniella (Nicaniella)	6	Early Toarcian		183	182	facultatively mobile	suspension feeder	infaunal	4	1	3	3	62	7068
Parallelodon hirsonensis	Arcida	Parallelodontidae	Parallelodon	1	Early Toarcian		183	182	stationary, attached	suspension feeder	epifaunal	2	1	1	4	62	7068
Plagiostoma punctatum	Pectinida	Limidae	Plagiostoma	9	Early Toarcian		183	182	stationary, attached	suspension feeder	low-level epifaunal	2	1	1	4	62	7068
Pleuromya aequistriata	Pholadida	Pleuromyidae	Pleuromya	2	Early Toarcian		183	182	facultatively mobile	suspension feeder	deep infaunal	4	1	4	14	62	7068
Pronoella	Veneroidei	Arcticidae	Pronoella	3	Early Toarcian		183	182	facultatively mobile	suspension feeder	infaunal	4	1	3	3	62	7068
Protocardia striatula	Cardiida	Cardiidae	Protocardia	11	Early Toarcian		183	182	facultatively mobile	suspension feeder	infaunal	4	1	3	3	62	7068
Pecten (Pecten) dentatus	Pectinida	Pectinidae	Pecten (Pecten)	5	Early Toarcian		183	182	facultatively mobile	suspension feeder	epifaunal	4	1	1	7	62	7068
Pseudotrapezium	Veneroidei	Arcticidae	Pseudotrapezium	1	Early Toarcian		183	182	facultatively mobile	suspension feeder	infaunal	4	1	3	3	62	7068
Pterocardia	Cardiida	Pterocardiidae	Pterocardia	1	Early Toarcian		183	182	facultatively mobile	suspension feeder	infaunal	4	1	3	3	62	7068
Weyla pradoanus	Pectinida	Neitheidae	Weyla	1	Early Toarcian		183	182	stationary, unattached	suspension feeder	semi-infaunal	1	1	2	20	62	7068
Atreta	Pectinida	Dimyidae	Atreta	4	Early Toarcian		183	182	cemented	suspension feeder	epifaunal	3	1	1	1	62	7068
Gryphaea (Catinula) crickleyensis	Ostreida	Gryphaeidae	Gryphaea (Catinula)	1	Early Toarcian		183	182	stationary, attached	suspension feeder	epifaunal	2	1	1	4	62	7068
Eopecten velatus	Pectinida	Pectinidae	Eopecten	2	Early Toarcian		183	182	stationary, attached	suspension feeder	low-level epifaunal	2	1	1	4	62	7068
Gryphaea (Bilobissa) sublobata	Ostreida	Gryphaeidae	Gryphaea (Bilobissa)	17	Early Toarcian		183	182	stationary, attached	suspension feeder	epifaunal	2	1	1	4	62	7068
Inoperna sowerbiana	Mytilida	Mytilidae	Inoperna	10	Early Toarcian		183	182	stationary, attached	suspension feeder	epifaunal	2	1	1	4	62	7068
Limea (Pseudolimea) roemeri	Pectinida	Limidae	Pseudolimea	1	Early Toarcian		183	182	stationary, attached	suspension feeder	low-level epifaunal	2	1	1	4	62	7068
Modiolus gerthi	Mytilida	Mytilidae	Modiolus	2	Early Toarcian		183	182	stationary, attached, epibiont	suspension feeder	semi-infaunal	2	1	2	16	62	7068
Nanogyra monoptera	Ostreida	Gryphaeidae	Nanogyra	2	Early Toarcian		183	182	stationary, attached	suspension feeder	epifaunal	2	1	1	4	62	7068
Protocardia striatula	Cardiida	Cardiidae	Protocardia	2	Early Toarcian		183	182	facultatively mobile	suspension feeder	infaunal	4	1	3	3	62	7068
Weyla pradoanus	Pectinida	Neitheidae	Weyla	2	Early Toarcian		183	182	stationary, unattached	suspension feeder	semi-infaunal	1	1	2	20	62	7068
Actinostreon gregareum	Ostreida	Palaeolophidae	Actinostreon	2	Early Toarcian		183	182	cemented	suspension feeder	epifaunal	3	1	1	1	62	7068
Arcomytilus asper	Mytilida	Mytilidae	Arcomytilus	1	Early Toarcian		183	182	stationary, attached	suspension feeder	epifaunal	2	1	1	4	62	7068
Ceratomya concentrica	Pholadida	Ceratomyidae	Ceratomya	1	Early Toarcian		183	182	facultatively mobile	suspension feeder	infaunal	4	1	3	3	62	7068
Coelopis (Coelopis)	Carditida	Astartidae	Coelopis (Coelopis)	1	Early Toarcian		183	182	slow motile	suspension feeder	infaunal	6	1	3	17	62	7068
Entolium (Entolium) corneolum	Pectinida	Entoliidae	Entolium (Entolium)	5	Early Toarcian		183	182	facultatively mobile	suspension feeder	epifaunal	4	1	1	7	62	7068
Grammatodon concinnus	Arcida	Parallelodontidae	Grammatodon	1	Early Toarcian		183	182	stationary, attached	suspension feeder	epifaunal	2	1	1	4	62	7068
Gryphaea (Bilobissa) sublobata	Ostreida	Gryphaeidae	Gryphaea (Bilobissa)	13	Early Toarcian		183	182	stationary, attached	suspension feeder	epifaunal	2	1	1	4	62	7068
Pinna (Pinna) folium	Ostreida	Pinnidae	Pinna (Pinna)	4	Early Toarcian		183	182	stationary, attached	suspension feeder	semi-infaunal	2	1	2	16	62	7068
Plagiostoma giganteum	Pectinida	Limidae	Plagiostoma	4	Early Toarcian		183	182	stationary, attached	suspension feeder	low-level epifaunal	2	1	1	4	62	7068
Pronoella	Veneroidei	Arcticidae	Pronoella	1	Early Toarcian		183	182	facultatively mobile	suspension feeder	infaunal	4	1	3	3	62	7068
Protocardia striatula	Cardiida	Cardiidae	Protocardia	1	Early Toarcian		183	182	facultatively mobile	suspension feeder	infaunal	4	1	3	3	62	7068
Weyla pradoanus	Pectinida	Neitheidae	Weyla	5	Early Toarcian		183	182	stationary, unattached	suspension feeder	semi-infaunal	1	1	2	20	62	7068
Camptonectes (Camptonectes) auritus	Pectinida	Pectinidae	Camptonectes (Camptonectes)	2	Early Toarcian		183	182	stationary, attached	suspension feeder	low-level epifaunal	2	1	1	4	62	7068
Entolium (Entolium) corneolum	Pectinida	Entoliidae	Entolium (Entolium)	3	Early Toarcian		183	182	facultatively mobile	suspension feeder	epifaunal	4	1	1	7	62	7068
Gryphaea (Gryphaea) dumortieri	Ostreida	Gryphaeidae	Gryphaea (Gryphaea)	18	Early Toarcian		183	182	stationary, attached	suspension feeder	epifaunal	2	1	1	4	62	7068
Inoperna sowerbiana	Mytilida	Mytilidae	Inoperna	3	Early Toarcian		183	182	stationary, attached	suspension feeder	epifaunal	2	1	1	4	62	7068
Pinna (Pinna) folium	Ostreida	Pinnidae	Pinna (Pinna)	8	Early Toarcian		183	182	stationary, attached	suspension feeder	semi-infaunal	2	1	2	16	62	7068
Pronoella	Veneroidei	Arcticidae	Pronoella	1	Early Toarcian		183	182	facultatively mobile	suspension feeder	infaunal	4	1	3	3	62	7068
Protocardia striatula	Cardiida	Cardiidae	Protocardia	2	Early Toarcian		183	182	facultatively mobile	suspension feeder	infaunal	4	1	3	3	62	7068
Weyla pradoanus	Pectinida	Neitheidae	Weyla	1	Early Toarcian		183	182	stationary, unattached	suspension feeder	semi-infaunal	1	1	2	20	62	7068
Corbulomima obscura	Pholadida	Corbulidae	Corbulomima	1	Early Toarcian		183	182	facultatively mobile, attached	suspension feeder	infaunal	5	1	3	5	62	7068
Entolium (Entolium) corneolum	Pectinida	Entoliidae	Entolium (Entolium)	2	Early Toarcian		183	182	facultatively mobile	suspension feeder	epifaunal	4	1	1	7	62	7068
Grammatodon concinnus	Arcida	Parallelodontidae	Grammatodon	1	Early Toarcian		183	182	stationary, attached	suspension feeder	epifaunal	2	1	1	4	62	7068
Gryphaea (Gryphaea) dumortieri	Ostreida	Gryphaeidae	Gryphaea (Gryphaea)	6	Early Toarcian		183	182	stationary, attached	suspension feeder	epifaunal	2	1	1	4	62	7068
Inoperna sowerbiana	Mytilida	Mytilidae	Inoperna	3	Early Toarcian		183	182	stationary, attached	suspension feeder	epifaunal	2	1	1	4	62	7068
Nanogyra monoptera	Ostreida	Gryphaeidae	Nanogyra	1	Early Toarcian		183	182	stationary, attached	suspension feeder	epifaunal	2	1	1	4	62	7068
Nicaniella (Nicaniella) voltzi	Carditida	Astartidae	Nicaniella (Nicaniella)	2	Early Toarcian		183	182	facultatively mobile	suspension feeder	infaunal	4	1	3	3	62	7068
Palaeoneilo galatea	Nuculanida	Malletiidae	Palaeoneilo	1	Early Toarcian		183	182	slow motile	deposit feeder, suspension feeder	infaunal	6	2	3	2	62	7068
Pholadomya (Pholadomya) ambigua	Pholadomyida	Pholadomyidae	Pholadomya (Pholadomya)	1	Early Toarcian		183	182	facultatively mobile	suspension feeder	deep infaunal	4	1	4	14	62	7068
Pinna (Pinna) folium	Ostreida	Pinnidae	Pinna (Pinna)	1	Early Toarcian		183	182	stationary, attached	suspension feeder	semi-infaunal	2	1	2	16	62	7068
Protocardia striatula	Cardiida	Cardiidae	Protocardia	2	Early Toarcian		183	182	facultatively mobile	suspension feeder	infaunal	4	1	3	3	62	7068
Weyla pradoanus	Pectinida	Neitheidae	Weyla	17	Early Toarcian		183	182	stationary, unattached	suspension feeder	semi-infaunal	1	1	2	20	62	7068
Actinostreon gregareum	Ostreida	Palaeolophidae	Actinostreon	1	Early Toarcian		183	182	cemented	suspension feeder	epifaunal	3	1	1	1	62	7068
Atreta	Pectinida	Dimyidae	Atreta	1	Early Toarcian		183	182	cemented	suspension feeder	epifaunal	3	1	1	1	62	7068
Camptonectes	Pectinida	Pectinidae	Camptonectes	1	Early Toarcian		183	182	stationary, attached	suspension feeder	low-level epifaunal	2	1	1	4	62	7068
Ceratomya concentrica	Pholadida	Ceratomyidae	Ceratomya	2	Early Toarcian		183	182	facultatively mobile	suspension feeder	infaunal	4	1	3	3	62	7068
Coelopis (Coelopis) parvocardinata	Carditida	Astartidae	Coelopis (Coelopis)	1	Early Toarcian		183	182	slow motile	suspension feeder	infaunal	6	1	3	17	62	7068
Corbulomima obscura	Pholadida	Corbulidae	Corbulomima	46	Early Toarcian		183	182	facultatively mobile, attached	suspension feeder	infaunal	5	1	3	5	62	7068
Gryphaea (Gryphaea) dumortieri	Ostreida	Gryphaeidae	Gryphaea (Gryphaea)	3	Early Toarcian		183	182	stationary, attached	suspension feeder	epifaunal	2	1	1	4	62	7068
Inoperna sowerbiana	Mytilida	Mytilidae	Inoperna	36	Early Toarcian		183	182	stationary, attached	suspension feeder	epifaunal	2	1	1	4	62	7068
Nicaniella (Nicaniella) voltzi	Carditida	Astartidae	Nicaniella (Nicaniella)	7	Early Toarcian		183	182	facultatively mobile	suspension feeder	infaunal	4	1	3	3	62	7068
Nuculana (Praesaccella) ovum	Nuculanida	Nuculanidae	Nuculana (Praesaccella)	2	Early Toarcian		183	182	slow motile	deposit feeder, suspension feeder	infaunal	6	2	3	2	62	7068
Pinna (Pinna) folium	Ostreida	Pinnidae	Pinna (Pinna)	9	Early Toarcian		183	182	stationary, attached	suspension feeder	semi-infaunal	2	1	2	16	62	7068
Placunopsis striatula	Pectinida	Anomiidae	Placunopsis	2	Early Toarcian		183	182	stationary, attached	suspension feeder	epifaunal, gregarious	2	1	1	4	62	7068
Plagiostoma	Pectinida	Limidae	Plagiostoma	1	Early Toarcian		183	182	stationary, attached	suspension feeder	low-level epifaunal	2	1	1	4	62	7068
Protocardia striatula	Cardiida	Cardiidae	Protocardia	3	Early Toarcian		183	182	facultatively mobile	suspension feeder	infaunal	4	1	3	3	62	7068
Weyla pradoanus	Pectinida	Neitheidae	Weyla	12	Early Toarcian		183	182	stationary, unattached	suspension feeder	semi-infaunal	1	1	2	20	62	7068
Actinostreon gregareum	Ostreida	Palaeolophidae	Actinostreon	8	Early Toarcian		183	182	cemented	suspension feeder	epifaunal	3	1	1	1	62	7068
Gryphaea (Gryphaea) dumortieri	Ostreida	Gryphaeidae	Gryphaea (Gryphaea)	2	Early Toarcian		183	182	stationary, attached	suspension feeder	epifaunal	2	1	1	4	62	7068
Inoperna sowerbiana	Mytilida	Mytilidae	Inoperna	3	Early Toarcian		183	182	stationary, attached	suspension feeder	epifaunal	2	1	1	4	62	7068
Parvamussium pumilum	Pectinida	Propeamussiidae	Parvamussium	2	Early Toarcian		183	182	facultatively mobile, unattached	carnivore	epifaunal	4	6	1	9	62	7068
Pinna (Pinna) folium	Ostreida	Pinnidae	Pinna (Pinna)	2	Early Toarcian		183	182	stationary, attached	suspension feeder	semi-infaunal	2	1	2	16	62	7068
Plagiostoma giganteum	Pectinida	Limidae	Plagiostoma	2	Early Toarcian		183	182	stationary, attached	suspension feeder	low-level epifaunal	2	1	1	4	62	7068
Gryphaea (Gryphaea) dumortieri	Ostreida	Gryphaeidae	Gryphaea (Gryphaea)	1	Early Toarcian		183	182	stationary, attached	suspension feeder	epifaunal	2	1	1	4	62	7068
Lima (Mantellum) duplicata	Pectinida	Limidae	Lima (Mantellum)	1	Early Toarcian		183	182	facultatively mobile	suspension feeder	epifaunal	2	1	1	4	62	7068
Parvamussium pumilum	Pectinida	Propeamussiidae	Parvamussium	1	Early Toarcian		183	182	facultatively mobile, unattached	carnivore	epifaunal	4	6	1	9	62	7068
Pinna (Pinna) folium	Ostreida	Pinnidae	Pinna (Pinna)	1	Early Toarcian		183	182	stationary, attached	suspension feeder	semi-infaunal	2	1	2	16	62	7068
Arcomytilus asper	Mytilida	Mytilidae	Arcomytilus	1	Early Toarcian		183	182	stationary, attached	suspension feeder	epifaunal	2	1	1	4	62	7068
Camptonectes (Camptonectes) auritus	Pectinida	Pectinidae	Camptonectes (Camptonectes)	1	Early Toarcian		183	182	stationary, attached	suspension feeder	low-level epifaunal	2	1	1	4	62	7068
Gryphaea (Gryphaea) dumortieri	Ostreida	Gryphaeidae	Gryphaea (Gryphaea)	6	Early Toarcian		183	182	stationary, attached	suspension feeder	epifaunal	2	1	1	4	62	7068
Parvamussium pumilum	Pectinida	Propeamussiidae	Parvamussium	28	Early Toarcian		183	182	facultatively mobile, unattached	carnivore	epifaunal	4	6	1	9	62	7068
Pinna (Pinna) folium	Ostreida	Pinnidae	Pinna (Pinna)	3	Early Toarcian		183	182	stationary, attached	suspension feeder	semi-infaunal	2	1	2	16	62	7068
Homomya alsatica	Pholadomyida	Pholadomyidae	Homomya	18	Early Toarcian		183	182	facultatively mobile	suspension feeder	deep infaunal	4	1	3	3	62	7068
Inoperna sowerbiana	Mytilida	Mytilidae	Inoperna	4	Early Toarcian		183	182	stationary, attached	suspension feeder	epifaunal	2	1	1	4	62	7068
Myophorella	Trigoniida	Myophorellidae	Myophorella	3	Early Toarcian		183	182	facultatively mobile	suspension feeder	infaunal	4	1	3	3	62	7068
Pholadomya (Pholadomya) fidicula	Pholadomyida	Pholadomyidae	Pholadomya (Pholadomya)	2	Early Toarcian		183	182	facultatively mobile	suspension feeder	deep infaunal	4	1	4	14	62	7068
Pholadomya (Pholadomya)	Pholadomyida	Pholadomyidae	Pholadomya (Pholadomya)	7	Early Toarcian		183	182	facultatively mobile	suspension feeder	deep infaunal	4	1	4	14	62	7068
Pinna (Pinna) folium	Ostreida	Pinnidae	Pinna (Pinna)	7	Early Toarcian		183	182	stationary, attached	suspension feeder	semi-infaunal	2	1	2	16	62	7068
Plicatula (Harpax) spinosa	Pectinida	Plicatulidae	Plicatula (Harpax)	1	Early Toarcian		183	182	stationary, attached, epibiont	suspension feeder	epifaunal	2	1	1	4	62	7068
Protocardia striatula	Cardiida	Cardiidae	Protocardia	1	Early Toarcian		183	182	facultatively mobile	suspension feeder	infaunal	4	1	3	3	62	7068
Grammatodon concinnus	Arcida	Parallelodontidae	Grammatodon	1	Early Toarcian		183	182	stationary, attached	suspension feeder	epifaunal	2	1	1	4	62	7068
Homomya alsatica	Pholadomyida	Pholadomyidae	Homomya	2	Early Toarcian		183	182	facultatively mobile	suspension feeder	deep infaunal	4	1	3	3	62	7068
Inoperna sowerbiana	Mytilida	Mytilidae	Inoperna	2	Early Toarcian		183	182	stationary, attached	suspension feeder	epifaunal	2	1	1	4	62	7068
Parallelodon hirsonensis	Arcida	Parallelodontidae	Parallelodon	1	Early Toarcian		183	182	stationary, attached	suspension feeder	epifaunal	2	1	1	4	62	7068
Pinna (Pinna) folium	Ostreida	Pinnidae	Pinna (Pinna)	1	Early Toarcian		183	182	stationary, attached	suspension feeder	semi-infaunal	2	1	2	16	62	7068
Gryphaea (Gryphaea) dumortieri	Ostreida	Gryphaeidae	Gryphaea (Gryphaea)	1	Early Toarcian		183	182	stationary, attached	suspension feeder	epifaunal	2	1	1	4	62	7068
Parvamussium pumilum	Pectinida	Propeamussiidae	Parvamussium	1	Early Toarcian		183	182	facultatively mobile, unattached	carnivore	epifaunal	4	6	1	9	62	7068
Arcomytilus asper	Mytilida	Mytilidae	Arcomytilus	2	Early Toarcian		183	182	stationary, attached	suspension feeder	epifaunal	2	1	1	4	62	7068
Coelopis (Coelopis) parvocardinata	Carditida	Astartidae	Coelopis (Coelopis)	2	Early Toarcian		183	182	slow motile	suspension feeder	infaunal	6	1	3	17	62	7068
Grammatodon concinnus	Arcida	Parallelodontidae	Grammatodon	1	Early Toarcian		183	182	stationary, attached	suspension feeder	epifaunal	2	1	1	4	62	7068
Homomya alsatica	Pholadomyida	Pholadomyidae	Homomya	29	Early Toarcian		183	182	facultatively mobile	suspension feeder	deep infaunal	4	1	3	3	62	7068
Inoperna sowerbiana	Mytilida	Mytilidae	Inoperna	3	Early Toarcian		183	182	stationary, attached	suspension feeder	epifaunal	2	1	1	4	62	7068
Lima (Mantellum) duplicata	Pectinida	Limidae	Lima (Mantellum)	5	Early Toarcian		183	182	facultatively mobile	suspension feeder	epifaunal	2	1	1	4	62	7068
Nuculana	Nuculanida	Nuculanidae	Nuculana	1	Early Toarcian		183	182	slow motile	deposit feeder, suspension feeder	infaunal	6	2	3	2	62	7068
Parvamussium pumilum	Pectinida	Propeamussiidae	Parvamussium	2	Early Toarcian		183	182	facultatively mobile, unattached	carnivore	epifaunal	4	6	1	9	62	7068
Pholadomya (Pholadomya) fidicula	Pholadomyida	Pholadomyidae	Pholadomya (Pholadomya)	1	Early Toarcian		183	182	facultatively mobile	suspension feeder	deep infaunal	4	1	4	14	62	7068
Pholadomya (Pholadomya)	Pholadomyida	Pholadomyidae	Pholadomya (Pholadomya)	1	Early Toarcian		183	182	facultatively mobile	suspension feeder	deep infaunal	4	1	4	14	62	7068
Pinna (Pinna) folium	Ostreida	Pinnidae	Pinna (Pinna)	4	Early Toarcian		183	182	stationary, attached	suspension feeder	semi-infaunal	2	1	2	16	62	7068
Protocardia striatula	Cardiida	Cardiidae	Protocardia	3	Early Toarcian		183	182	facultatively mobile	suspension feeder	infaunal	4	1	3	3	62	7068
Mactromya cardioides	Lucinida	Mactromyidae	Mactromya	6	Early Toarcian		183	182	facultatively mobile	chemosymbiotic	deep infaunal	4	9	3	11	62	7068
Arcomytilus asper	Mytilida	Mytilidae	Arcomytilus	5	Early Toarcian		183	182	stationary, attached	suspension feeder	epifaunal	2	1	1	4	62	7068
Camptonectes (Camptonectes) auritus	Pectinida	Pectinidae	Camptonectes (Camptonectes)	4	Early Toarcian		183	182	stationary, attached	suspension feeder	low-level epifaunal	2	1	1	4	62	7068
Chlamys textoria	Pectinida	Pectinidae	Chlamys	2	Early Toarcian		183	182	facultatively mobile, unattached	suspension feeder	epifaunal	4	1	1	7	62	7068
Ctenostreon rugosum	Pectinida	Limidae	Ctenostreon	3	Early Toarcian		183	182	stationary, attached	suspension feeder	low-level epifaunal	2	1	1	4	62	7068
Cucullaea (Idonearca) muensteri	Arcida	Cucullaeidae	Cucullaea (Idonearca)	11	Early Toarcian		183	182	facultatively mobile	suspension feeder	infaunal	4	1	3	3	62	7068
Entolium (Entolium) corneolum	Pectinida	Entoliidae	Entolium (Entolium)	1	Early Toarcian		183	182	facultatively mobile	suspension feeder	epifaunal	4	1	1	7	62	7068
Grammatodon concinnus	Arcida	Parallelodontidae	Grammatodon	1	Early Toarcian		183	182	stationary, attached	suspension feeder	epifaunal	2	1	1	4	62	7068
Gryphaea (Gryphaea) dumortieri	Ostreida	Gryphaeidae	Gryphaea (Gryphaea)	3	Early Toarcian		183	182	stationary, attached	suspension feeder	epifaunal	2	1	1	4	62	7068
Homomya alsatica	Pholadomyida	Pholadomyidae	Homomya	1	Early Toarcian		183	182	facultatively mobile	suspension feeder	deep infaunal	4	1	3	3	62	7068
Lima (Mantellum) duplicata	Pectinida	Limidae	Lima (Mantellum)	1	Early Toarcian		183	182	facultatively mobile	suspension feeder	epifaunal	2	1	1	4	62	7068
Modiolus giganteus	Mytilida	Mytilidae	Modiolus	1	Early Toarcian		183	182	stationary, attached, epibiont	suspension feeder	semi-infaunal	2	1	2	16	62	7068
Modiolus (Modiolus) imbricatus	Mytilida	Mytilidae	Modiolus (Modiolus)	1	Early Toarcian		183	182	stationary, attached, epibiont	suspension feeder	semi-infaunal	2	1	2	16	62	7068
Myoconcha	Cardiida	Kalenteridae	Myoconcha	1	Early Toarcian		183	182	stationary, attached	suspension feeder	semi-infaunal	2	1	2	16	62	7068
Oxytoma inequivalvis	Pectinida	Oxytomidae	Oxytoma	8	Early Toarcian		183	182	facultatively mobile, attached	suspension feeder	epifaunal	5	1	1	19	62	7068
Parvamussium pumilum	Pectinida	Propeamussiidae	Parvamussium	4	Early Toarcian		183	182	facultatively mobile, unattached	carnivore	epifaunal	4	6	1	9	62	7068
Pinna (Pinna) folium	Ostreida	Pinnidae	Pinna (Pinna)	4	Early Toarcian		183	182	stationary, attached	suspension feeder	semi-infaunal	2	1	2	16	62	7068
Placunopsis striatula	Pectinida	Anomiidae	Placunopsis	2	Early Toarcian		183	182	stationary, attached	suspension feeder	epifaunal, gregarious	2	1	1	4	62	7068
Plagiostoma punctatum	Pectinida	Limidae	Plagiostoma	8	Early Toarcian		183	182	stationary, attached	suspension feeder	low-level epifaunal	2	1	1	4	62	7068
Plagiostoma rodburgensis	Pectinida	Limidae	Plagiostoma	4	Early Toarcian		183	182	stationary, attached	suspension feeder	low-level epifaunal	2	1	1	4	62	7068
Plagiostoma	Pectinida	Limidae	Plagiostoma	4	Early Toarcian		183	182	stationary, attached	suspension feeder	low-level epifaunal	2	1	1	4	62	7068
Pleuromya uniformis	Pholadida	Pleuromyidae	Pleuromya	3	Early Toarcian		183	182	facultatively mobile	suspension feeder	deep infaunal	4	1	4	14	62	7068
Plicatula (Harpax) auricula	Pectinida	Plicatulidae	Plicatula (Harpax)	1	Early Toarcian		183	182	stationary, attached, epibiont	suspension feeder	epifaunal	2	1	1	4	62	7068
Protocardia striatula	Cardiida	Cardiidae	Protocardia	1	Early Toarcian		183	182	facultatively mobile	suspension feeder	infaunal	4	1	3	3	62	7068
Pseudomytiloides	Myalinida	Inoceramidae	Pseudomytiloides	1	Early Toarcian		183	182	facultatively mobile, attached	suspension feeder	epifaunal	5	1	1	19	62	7068
Mactromya cardioides	Lucinida	Mactromyidae	Mactromya	1	Early Toarcian		183	182	facultatively mobile	chemosymbiotic	deep infaunal	4	9	3	11	62	7068
Cucullaea (Idonearca) muensteri	Arcida	Cucullaeidae	Cucullaea (Idonearca)	1	Early Toarcian		183	182	facultatively mobile	suspension feeder	infaunal	4	1	3	3	62	7068
Myophorella	Trigoniida	Myophorellidae	Myophorella	1	Early Toarcian		183	182	facultatively mobile	suspension feeder	infaunal	4	1	3	3	62	7068
Parvamussium pumilum	Pectinida	Propeamussiidae	Parvamussium	3	Early Toarcian		183	182	facultatively mobile, unattached	carnivore	epifaunal	4	6	1	9	62	7068
Pholadomya (Pholadomya)	Pholadomyida	Pholadomyidae	Pholadomya (Pholadomya)	1	Early Toarcian		183	182	facultatively mobile	suspension feeder	deep infaunal	4	1	4	14	62	7068
Pinna (Pinna) folium	Ostreida	Pinnidae	Pinna (Pinna)	2	Early Toarcian		183	182	stationary, attached	suspension feeder	semi-infaunal	2	1	2	16	62	7068
Pinna (Pinna) opalina	Ostreida	Pinnidae	Pinna (Pinna)	1	Early Toarcian		183	182	stationary, attached	suspension feeder	semi-infaunal	2	1	2	16	62	7068
Trigonia (Trigonia)	Trigoniida	Trigoniidae	Trigonia (Trigonia)	1	Early Toarcian		183	182	facultatively mobile	suspension feeder	infaunal	4	1	3	3	62	7068
Arcomytilus asper	Mytilida	Mytilidae	Arcomytilus	3	Early Toarcian		183	182	stationary, attached	suspension feeder	epifaunal	2	1	1	4	62	7068
Grammatodon concinnus	Arcida	Parallelodontidae	Grammatodon	1	Early Toarcian		183	182	stationary, attached	suspension feeder	epifaunal	2	1	1	4	62	7068
Lima (Mantellum) duplicata	Pectinida	Limidae	Lima (Mantellum)	2	Early Toarcian		183	182	facultatively mobile	suspension feeder	epifaunal	2	1	1	4	62	7068
Parvamussium pumilum	Pectinida	Propeamussiidae	Parvamussium	2	Early Toarcian		183	182	facultatively mobile, unattached	carnivore	epifaunal	4	6	1	9	62	7068
Pholadomya (Pholadomya)	Pholadomyida	Pholadomyidae	Pholadomya (Pholadomya)	1	Early Toarcian		183	182	facultatively mobile	suspension feeder	deep infaunal	4	1	4	14	62	7068
Pinna (Pinna) opalina	Ostreida	Pinnidae	Pinna (Pinna)	2	Early Toarcian		183	182	stationary, attached	suspension feeder	semi-infaunal	2	1	2	16	62	7068
Plagiostoma punctatum	Pectinida	Limidae	Plagiostoma	1	Early Toarcian		183	182	stationary, attached	suspension feeder	low-level epifaunal	2	1	1	4	62	7068
Pleuromya uniformis	Pholadida	Pleuromyidae	Pleuromya	1	Early Toarcian		183	182	facultatively mobile	suspension feeder	deep infaunal	4	1	4	14	62	7068
Actinostreon gregareum	Ostreida	Palaeolophidae	Actinostreon	1	Early Toarcian		183	182	cemented	suspension feeder	epifaunal	3	1	1	1	62	7068
Arcomytilus asper	Mytilida	Mytilidae	Arcomytilus	2	Early Toarcian		183	182	stationary, attached	suspension feeder	epifaunal	2	1	1	4	62	7068
Camptonectes (Camptonectes) auritus	Pectinida	Pectinidae	Camptonectes (Camptonectes)	1	Early Toarcian		183	182	stationary, attached	suspension feeder	low-level epifaunal	2	1	1	4	62	7068
Grammatodon concinnus	Arcida	Parallelodontidae	Grammatodon	8	Early Toarcian		183	182	stationary, attached	suspension feeder	epifaunal	2	1	1	4	62	7068
Gryphaea (Gryphaea) dumortieri	Ostreida	Gryphaeidae	Gryphaea (Gryphaea)	2	Early Toarcian		183	182	stationary, attached	suspension feeder	epifaunal	2	1	1	4	62	7068
Myophorella	Trigoniida	Myophorellidae	Myophorella	1	Early Toarcian		183	182	facultatively mobile	suspension feeder	infaunal	4	1	3	3	62	7068
Parallelodon hirsonensis	Arcida	Parallelodontidae	Parallelodon	4	Early Toarcian		183	182	stationary, attached	suspension feeder	epifaunal	2	1	1	4	62	7068
Parvamussium pumilum	Pectinida	Propeamussiidae	Parvamussium	2	Early Toarcian		183	182	facultatively mobile, unattached	carnivore	epifaunal	4	6	1	9	62	7068
Pholadomya (Pholadomya)	Pholadomyida	Pholadomyidae	Pholadomya (Pholadomya)	1	Early Toarcian		183	182	facultatively mobile	suspension feeder	deep infaunal	4	1	4	14	62	7068
Pinna (Pinna) opalina	Ostreida	Pinnidae	Pinna (Pinna)	2	Early Toarcian		183	182	stationary, attached	suspension feeder	semi-infaunal	2	1	2	16	62	7068
Pleuromya uniformis	Pholadida	Pleuromyidae	Pleuromya	8	Early Toarcian		183	182	facultatively mobile	suspension feeder	deep infaunal	4	1	4	14	62	7068
Plicatula (Harpax) auricula	Pectinida	Plicatulidae	Plicatula (Harpax)	2	Early Toarcian		183	182	stationary, attached, epibiont	suspension feeder	epifaunal	2	1	1	4	62	7068
Protocardia striatula	Cardiida	Cardiidae	Protocardia	4	Early Toarcian		183	182	facultatively mobile	suspension feeder	infaunal	4	1	3	3	62	7068
Actinostreon gregareum	Ostreida	Palaeolophidae	Actinostreon	1	Early Toarcian		183	182	cemented	suspension feeder	epifaunal	3	1	1	1	62	7068
Bakevellia (Bakevellia) waltoni	Ostreida	Bakevelliidae	Bakevellia (Bakevellia)	1	Early Toarcian		183	182	stationary	suspension feeder	semi-infaunal	2	1	2	16	62	7068
Camptonectes (Camptonectes) auritus	Pectinida	Pectinidae	Camptonectes (Camptonectes)	1	Early Toarcian		183	182	stationary, attached	suspension feeder	low-level epifaunal	2	1	1	4	62	7068
Cucullaea (Idonearca) muensteri	Arcida	Cucullaeidae	Cucullaea (Idonearca)	1	Early Toarcian		183	182	facultatively mobile	suspension feeder	infaunal	4	1	3	3	62	7068
Grammatodon concinnus	Arcida	Parallelodontidae	Grammatodon	1	Early Toarcian		183	182	stationary, attached	suspension feeder	epifaunal	2	1	1	4	62	7068
Gryphaea (Gryphaea) dumortieri	Ostreida	Gryphaeidae	Gryphaea (Gryphaea)	2	Early Toarcian		183	182	stationary, attached	suspension feeder	epifaunal	2	1	1	4	62	7068
Myophorella	Trigoniida	Myophorellidae	Myophorella	2	Early Toarcian		183	182	facultatively mobile	suspension feeder	infaunal	4	1	3	3	62	7068
Parallelodon hirsonensis	Arcida	Parallelodontidae	Parallelodon	2	Early Toarcian		183	182	stationary, attached	suspension feeder	epifaunal	2	1	1	4	62	7068
Parvamussium pumilum	Pectinida	Propeamussiidae	Parvamussium	1	Early Toarcian		183	182	facultatively mobile, unattached	carnivore	epifaunal	4	6	1	9	62	7068
Pholadomya (Pholadomya)	Pholadomyida	Pholadomyidae	Pholadomya (Pholadomya)	1	Early Toarcian		183	182	facultatively mobile	suspension feeder	deep infaunal	4	1	4	14	62	7068
Pinna (Pinna) folium	Ostreida	Pinnidae	Pinna (Pinna)	6	Early Toarcian		183	182	stationary, attached	suspension feeder	semi-infaunal	2	1	2	16	62	7068
Pinna (Pinna) opalina	Ostreida	Pinnidae	Pinna (Pinna)	2	Early Toarcian		183	182	stationary, attached	suspension feeder	semi-infaunal	2	1	2	16	62	7068
Plagiostoma punctatum	Pectinida	Limidae	Plagiostoma	1	Early Toarcian		183	182	stationary, attached	suspension feeder	low-level epifaunal	2	1	1	4	62	7068
Pleuromya uniformis	Pholadida	Pleuromyidae	Pleuromya	1	Early Toarcian		183	182	facultatively mobile	suspension feeder	deep infaunal	4	1	4	14	62	7068
Plicatula (Harpax) auricula	Pectinida	Plicatulidae	Plicatula (Harpax)	9	Early Toarcian		183	182	stationary, attached, epibiont	suspension feeder	epifaunal	2	1	1	4	62	7068
Cucullaea (Idonearca) muensteri	Arcida	Cucullaeidae	Cucullaea (Idonearca)	7	Early Toarcian		183	182	facultatively mobile	suspension feeder	infaunal	4	1	3	3	62	7068
Grammatodon concinnus	Arcida	Parallelodontidae	Grammatodon	1	Early Toarcian		183	182	stationary, attached	suspension feeder	epifaunal	2	1	1	4	62	7068
Gryphaea (Gryphaea) dumortieri	Ostreida	Gryphaeidae	Gryphaea (Gryphaea)	4	Early Toarcian		183	182	stationary, attached	suspension feeder	epifaunal	2	1	1	4	62	7068
Homomya alsatica	Pholadomyida	Pholadomyidae	Homomya	7	Early Toarcian		183	182	facultatively mobile	suspension feeder	deep infaunal	4	1	3	3	62	7068
Inoperna sowerbiana	Mytilida	Mytilidae	Inoperna	1	Early Toarcian		183	182	stationary, attached	suspension feeder	epifaunal	2	1	1	4	62	7068
Myophorella	Trigoniida	Myophorellidae	Myophorella	1	Early Toarcian		183	182	facultatively mobile	suspension feeder	infaunal	4	1	3	3	62	7068
Parallelodon hirsonensis	Arcida	Parallelodontidae	Parallelodon	4	Early Toarcian		183	182	stationary, attached	suspension feeder	epifaunal	2	1	1	4	62	7068
Parvamussium pumilum	Pectinida	Propeamussiidae	Parvamussium	3	Early Toarcian		183	182	facultatively mobile, unattached	carnivore	epifaunal	4	6	1	9	62	7068
Pholadomya (Pholadomya)	Pholadomyida	Pholadomyidae	Pholadomya (Pholadomya)	2	Early Toarcian		183	182	facultatively mobile	suspension feeder	deep infaunal	4	1	4	14	62	7068
Pleuromya uniformis	Pholadida	Pleuromyidae	Pleuromya	1	Early Toarcian		183	182	facultatively mobile	suspension feeder	deep infaunal	4	1	4	14	62	7068
Plicatula (Harpax) auricula	Pectinida	Plicatulidae	Plicatula (Harpax)	1	Early Toarcian		183	182	stationary, attached, epibiont	suspension feeder	epifaunal	2	1	1	4	62	7068
Protocardia striatula	Cardiida	Cardiidae	Protocardia	1	Early Toarcian		183	182	facultatively mobile	suspension feeder	infaunal	4	1	3	3	62	7068
Chlamys textoria	Pectinida	Pectinidae	Chlamys	1	Early Toarcian		183	182	facultatively mobile, unattached	suspension feeder	epifaunal	4	1	1	7	62	7068
Ctenostreon rugosum	Pectinida	Limidae	Ctenostreon	2	Early Toarcian		183	182	stationary, attached	suspension feeder	low-level epifaunal	2	1	1	4	62	7068
Cucullaea (Idonearca) muensteri	Arcida	Cucullaeidae	Cucullaea (Idonearca)	5	Early Toarcian		183	182	facultatively mobile	suspension feeder	infaunal	4	1	3	3	62	7068
Grammatodon concinnus	Arcida	Parallelodontidae	Grammatodon	7	Early Toarcian		183	182	stationary, attached	suspension feeder	epifaunal	2	1	1	4	62	7068
Gryphaea (Gryphaea) dumortieri	Ostreida	Gryphaeidae	Gryphaea (Gryphaea)	5	Early Toarcian		183	182	stationary, attached	suspension feeder	epifaunal	2	1	1	4	62	7068
Myophorella	Trigoniida	Myophorellidae	Myophorella	4	Early Toarcian		183	182	facultatively mobile	suspension feeder	infaunal	4	1	3	3	62	7068
Parallelodon hirsonensis	Arcida	Parallelodontidae	Parallelodon	1	Early Toarcian		183	182	stationary, attached	suspension feeder	epifaunal	2	1	1	4	62	7068
Parvamussium pumilum	Pectinida	Propeamussiidae	Parvamussium	1	Early Toarcian		183	182	facultatively mobile, unattached	carnivore	epifaunal	4	6	1	9	62	7068
Pholadomya (Pholadomya)	Pholadomyida	Pholadomyidae	Pholadomya (Pholadomya)	2	Early Toarcian		183	182	facultatively mobile	suspension feeder	deep infaunal	4	1	4	14	62	7068
Pinna (Pinna) opalina	Ostreida	Pinnidae	Pinna (Pinna)	2	Early Toarcian		183	182	stationary, attached	suspension feeder	semi-infaunal	2	1	2	16	62	7068
Plicatula (Harpax) auricula	Pectinida	Plicatulidae	Plicatula (Harpax)	1	Early Toarcian		183	182	stationary, attached, epibiont	suspension feeder	epifaunal	2	1	1	4	62	7068
Protocardia striatula	Cardiida	Cardiidae	Protocardia	3	Early Toarcian		183	182	facultatively mobile	suspension feeder	infaunal	4	1	3	3	62	7068
Pseudomytiloides	Myalinida	Inoceramidae	Pseudomytiloides	1	Early Toarcian		183	182	facultatively mobile, attached	suspension feeder	epifaunal	5	1	1	19	62	7068
Bakevellia (Bakevellia) waltoni	Ostreida	Bakevelliidae	Bakevellia (Bakevellia)	1	Early Toarcian		183	182	stationary	suspension feeder	semi-infaunal	2	1	2	16	62	7068
Costigervillia	Ostreida	Bakevelliidae	Costigervillia	1	Early Toarcian		183	182	stationary, attached, epibiont	suspension feeder	epifaunal	2	1	1	4	62	7068
Cucullaea (Idonearca) muensteri	Arcida	Cucullaeidae	Cucullaea (Idonearca)	4	Early Toarcian		183	182	facultatively mobile	suspension feeder	infaunal	4	1	3	3	62	7068
Eopecten velatus	Pectinida	Pectinidae	Eopecten	1	Early Toarcian		183	182	stationary, attached	suspension feeder	low-level epifaunal	2	1	1	4	62	7068
Grammatodon concinnus	Arcida	Parallelodontidae	Grammatodon	1	Early Toarcian		183	182	stationary, attached	suspension feeder	epifaunal	2	1	1	4	62	7068
Gryphaea (Gryphaea) dumortieri	Ostreida	Gryphaeidae	Gryphaea (Gryphaea)	7	Early Toarcian		183	182	stationary, attached	suspension feeder	epifaunal	2	1	1	4	62	7068
Myophorella	Trigoniida	Myophorellidae	Myophorella	1	Early Toarcian		183	182	facultatively mobile	suspension feeder	infaunal	4	1	3	3	62	7068
Parvamussium pumilum	Pectinida	Propeamussiidae	Parvamussium	1	Early Toarcian		183	182	facultatively mobile, unattached	carnivore	epifaunal	4	6	1	9	62	7068
Plicatula (Harpax) auricula	Pectinida	Plicatulidae	Plicatula (Harpax)	1	Early Toarcian		183	182	stationary, attached, epibiont	suspension feeder	epifaunal	2	1	1	4	62	7068
Protocardia striatula	Cardiida	Cardiidae	Protocardia	1	Early Toarcian		183	182	facultatively mobile	suspension feeder	infaunal	4	1	3	3	62	7068
Bakevellia (Bakevellia) waltoni	Ostreida	Bakevelliidae	Bakevellia (Bakevellia)	1	Early Toarcian		183	182	stationary	suspension feeder	semi-infaunal	2	1	2	16	62	7068
Costigervillia	Ostreida	Bakevelliidae	Costigervillia	1	Early Toarcian		183	182	stationary, attached, epibiont	suspension feeder	epifaunal	2	1	1	4	62	7068
Cucullaea (Idonearca) muensteri	Arcida	Cucullaeidae	Cucullaea (Idonearca)	2	Early Toarcian		183	182	facultatively mobile	suspension feeder	infaunal	4	1	3	3	62	7068
Grammatodon concinnus	Arcida	Parallelodontidae	Grammatodon	1	Early Toarcian		183	182	stationary, attached	suspension feeder	epifaunal	2	1	1	4	62	7068
Gryphaea (Gryphaea) dumortieri	Ostreida	Gryphaeidae	Gryphaea (Gryphaea)	2	Early Toarcian		183	182	stationary, attached	suspension feeder	epifaunal	2	1	1	4	62	7068
Homomya alsatica	Pholadomyida	Pholadomyidae	Homomya	1	Early Toarcian		183	182	facultatively mobile	suspension feeder	deep infaunal	4	1	3	3	62	7068
Homomya ventricosa	Pholadomyida	Pholadomyidae	Homomya	1	Early Toarcian		183	182	facultatively mobile	suspension feeder	deep infaunal	4	1	3	3	62	7068
Myophorella	Trigoniida	Myophorellidae	Myophorella	3	Early Toarcian		183	182	facultatively mobile	suspension feeder	infaunal	4	1	3	3	62	7068
Nanogyra monoptera	Ostreida	Gryphaeidae	Nanogyra	1	Early Toarcian		183	182	stationary, attached	suspension feeder	epifaunal	2	1	1	4	62	7068
Parallelodon hirsonensis	Arcida	Parallelodontidae	Parallelodon	2	Early Toarcian		183	182	stationary, attached	suspension feeder	epifaunal	2	1	1	4	62	7068
Pinna (Pinna) folium	Ostreida	Pinnidae	Pinna (Pinna)	2	Early Toarcian		183	182	stationary, attached	suspension feeder	semi-infaunal	2	1	2	16	62	7068
Plicatula (Harpax) auricula	Pectinida	Plicatulidae	Plicatula (Harpax)	1	Early Toarcian		183	182	stationary, attached, epibiont	suspension feeder	epifaunal	2	1	1	4	62	7068
Protocardia striatula	Cardiida	Cardiidae	Protocardia	3	Early Toarcian		183	182	facultatively mobile	suspension feeder	infaunal	4	1	3	3	62	7068
Grammatodon concinnus	Arcida	Parallelodontidae	Grammatodon	1	Early Toarcian		183	182	stationary, attached	suspension feeder	epifaunal	2	1	1	4	62	7068
Gryphaea (Gryphaea) dumortieri	Ostreida	Gryphaeidae	Gryphaea (Gryphaea)	4	Early Toarcian		183	182	stationary, attached	suspension feeder	epifaunal	2	1	1	4	62	7068
Inoperna sowerbiana	Mytilida	Mytilidae	Inoperna	1	Early Toarcian		183	182	stationary, attached	suspension feeder	epifaunal	2	1	1	4	62	7068
Myophorella	Trigoniida	Myophorellidae	Myophorella	3	Early Toarcian		183	182	facultatively mobile	suspension feeder	infaunal	4	1	3	3	62	7068
Parvamussium pumilum	Pectinida	Propeamussiidae	Parvamussium	2	Early Toarcian		183	182	facultatively mobile, unattached	carnivore	epifaunal	4	6	1	9	62	7068
Protocardia striatula	Cardiida	Cardiidae	Protocardia	1	Early Toarcian		183	182	facultatively mobile	suspension feeder	infaunal	4	1	3	3	62	7068
Camptonectes (Camptonectes) auritus	Pectinida	Pectinidae	Camptonectes (Camptonectes)	2	Early Toarcian		183	182	stationary, attached	suspension feeder	low-level epifaunal	2	1	1	4	62	7068
Cucullaea (Idonearca) muensteri	Arcida	Cucullaeidae	Cucullaea (Idonearca)	1	Early Toarcian		183	182	facultatively mobile	suspension feeder	infaunal	4	1	3	3	62	7068
Grammatodon concinnus	Arcida	Parallelodontidae	Grammatodon	6	Early Toarcian		183	182	stationary, attached	suspension feeder	epifaunal	2	1	1	4	62	7068
Gryphaea (Gryphaea) dumortieri	Ostreida	Gryphaeidae	Gryphaea (Gryphaea)	4	Early Toarcian		183	182	stationary, attached	suspension feeder	epifaunal	2	1	1	4	62	7068
Homomya alsatica	Pholadomyida	Pholadomyidae	Homomya	1	Early Toarcian		183	182	facultatively mobile	suspension feeder	deep infaunal	4	1	3	3	62	7068
Isocyprina	Veneroidei	Arcticidae	Isocyprina	2	Early Toarcian		183	182	facultatively mobile	suspension feeder	infaunal	4	1	3	3	62	7068
Myophorella	Trigoniida	Myophorellidae	Myophorella	1	Early Toarcian		183	182	facultatively mobile	suspension feeder	infaunal	4	1	3	3	62	7068
Nicaniella (Nicaniella) voltzi	Carditida	Astartidae	Nicaniella (Nicaniella)	1	Early Toarcian		183	182	facultatively mobile	suspension feeder	infaunal	4	1	3	3	62	7068
Nuculana	Nuculanida	Nuculanidae	Nuculana	1	Early Toarcian		183	182	slow motile	deposit feeder, suspension feeder	infaunal	6	2	3	2	62	7068
Parvamussium pumilum	Pectinida	Propeamussiidae	Parvamussium	1	Early Toarcian		183	182	facultatively mobile, unattached	carnivore	epifaunal	4	6	1	9	62	7068
Pleuromya uniformis	Pholadida	Pleuromyidae	Pleuromya	6	Early Toarcian		183	182	facultatively mobile	suspension feeder	deep infaunal	4	1	4	14	62	7068
Plicatula (Harpax) auricula	Pectinida	Plicatulidae	Plicatula (Harpax)	1	Early Toarcian		183	182	stationary, attached, epibiont	suspension feeder	epifaunal	2	1	1	4	62	7068
Protocardia striatula	Cardiida	Cardiidae	Protocardia	4	Early Toarcian		183	182	facultatively mobile	suspension feeder	infaunal	4	1	3	3	62	7068
Cucullaea (Idonearca) muensteri	Arcida	Cucullaeidae	Cucullaea (Idonearca)	4	Early Toarcian		183	182	facultatively mobile	suspension feeder	infaunal	4	1	3	3	62	7068
Eopecten velatus	Pectinida	Pectinidae	Eopecten	2	Early Toarcian		183	182	stationary, attached	suspension feeder	low-level epifaunal	2	1	1	4	62	7068
Gryphaea (Gryphaea) dumortieri	Ostreida	Gryphaeidae	Gryphaea (Gryphaea)	12	Early Toarcian		183	182	stationary, attached	suspension feeder	epifaunal	2	1	1	4	62	7068
Homomya alsatica	Pholadomyida	Pholadomyidae	Homomya	2	Early Toarcian		183	182	facultatively mobile	suspension feeder	deep infaunal	4	1	3	3	62	7068
Lima (Mantellum) duplicata	Pectinida	Limidae	Lima (Mantellum)	1	Early Toarcian		183	182	facultatively mobile	suspension feeder	epifaunal	2	1	1	4	62	7068
Myophorella	Trigoniida	Myophorellidae	Myophorella	1	Early Toarcian		183	182	facultatively mobile	suspension feeder	infaunal	4	1	3	3	62	7068
Parvamussium pumilum	Pectinida	Propeamussiidae	Parvamussium	2	Early Toarcian		183	182	facultatively mobile, unattached	carnivore	epifaunal	4	6	1	9	62	7068
Protocardia striatula	Cardiida	Cardiidae	Protocardia	1	Early Toarcian		183	182	facultatively mobile	suspension feeder	infaunal	4	1	3	3	62	7068
Bositra buchi	Ostreida	Posidoniidae	Bositra	2	Early Toarcian		183	182	stationary, unattached	suspension feeder	epifaunal	1	1	1	12	62	7068
Camptonectes (Camptonectes) auritus	Pectinida	Pectinidae	Camptonectes (Camptonectes)	1	Early Toarcian		183	182	stationary, attached	suspension feeder	low-level epifaunal	2	1	1	4	62	7068
Coelopis (Coelopis)	Carditida	Astartidae	Coelopis (Coelopis)	2	Early Toarcian		183	182	slow motile	suspension feeder	infaunal	6	1	3	17	62	7068
Cucullaea (Idonearca) muensteri	Arcida	Cucullaeidae	Cucullaea (Idonearca)	2	Early Toarcian		183	182	facultatively mobile	suspension feeder	infaunal	4	1	3	3	62	7068
Grammatodon concinnus	Arcida	Parallelodontidae	Grammatodon	1	Early Toarcian		183	182	stationary, attached	suspension feeder	epifaunal	2	1	1	4	62	7068
Gryphaea (Gryphaea) dumortieri	Ostreida	Gryphaeidae	Gryphaea (Gryphaea)	5	Early Toarcian		183	182	stationary, attached	suspension feeder	epifaunal	2	1	1	4	62	7068
Homomya alsatica	Pholadomyida	Pholadomyidae	Homomya	2	Early Toarcian		183	182	facultatively mobile	suspension feeder	deep infaunal	4	1	3	3	62	7068
Lima (Mantellum) duplicata	Pectinida	Limidae	Lima (Mantellum)	1	Early Toarcian		183	182	facultatively mobile	suspension feeder	epifaunal	2	1	1	4	62	7068
Myophorella	Trigoniida	Myophorellidae	Myophorella	1	Early Toarcian		183	182	facultatively mobile	suspension feeder	infaunal	4	1	3	3	62	7068
Parallelodon hirsonensis	Arcida	Parallelodontidae	Parallelodon	3	Early Toarcian		183	182	stationary, attached	suspension feeder	epifaunal	2	1	1	4	62	7068
Parvamussium pumilum	Pectinida	Propeamussiidae	Parvamussium	1	Early Toarcian		183	182	facultatively mobile, unattached	carnivore	epifaunal	4	6	1	9	62	7068
Plagiostoma punctatum	Pectinida	Limidae	Plagiostoma	1	Early Toarcian		183	182	stationary, attached	suspension feeder	low-level epifaunal	2	1	1	4	62	7068
Plesiocyprina	Veneroidei	Arcticidae	Plesiocyprina	1	Early Toarcian		183	182	facultatively mobile	suspension feeder	infaunal	4	1	3	3	62	7068
Trigonia (Trigonia)	Trigoniida	Trigoniidae	Trigonia (Trigonia)	1	Early Toarcian		183	182	facultatively mobile	suspension feeder	infaunal	4	1	3	3	62	7068
Actinostreon gregareum	Ostreida	Palaeolophidae	Actinostreon	1	Early Toarcian		183	182	cemented	suspension feeder	epifaunal	3	1	1	1	62	7068
Arcomytilus asper	Mytilida	Mytilidae	Arcomytilus	4	Early Toarcian		183	182	stationary, attached	suspension feeder	epifaunal	2	1	1	4	62	7068
Camptonectes (Camptonectes) auritus	Pectinida	Pectinidae	Camptonectes (Camptonectes)	3	Early Toarcian		183	182	stationary, attached	suspension feeder	low-level epifaunal	2	1	1	4	62	7068
Camptonectes subulatus	Pectinida	Pectinidae	Camptonectes	1	Early Toarcian		183	182	stationary, attached	suspension feeder	low-level epifaunal	2	1	1	4	62	7068
Ctenostreon rugosum	Pectinida	Limidae	Ctenostreon	1	Early Toarcian		183	182	stationary, attached	suspension feeder	low-level epifaunal	2	1	1	4	62	7068
Cucullaea (Idonearca) muensteri	Arcida	Cucullaeidae	Cucullaea (Idonearca)	3	Early Toarcian		183	182	facultatively mobile	suspension feeder	infaunal	4	1	3	3	62	7068
Gryphaea (Gryphaea) dumortieri	Ostreida	Gryphaeidae	Gryphaea (Gryphaea)	17	Early Toarcian		183	182	stationary, attached	suspension feeder	epifaunal	2	1	1	4	62	7068
Lima (Mantellum) duplicata	Pectinida	Limidae	Lima (Mantellum)	2	Early Toarcian		183	182	facultatively mobile	suspension feeder	epifaunal	2	1	1	4	62	7068
Modiolus (Modiolus) imbricatus	Mytilida	Mytilidae	Modiolus (Modiolus)	1	Early Toarcian		183	182	stationary, attached, epibiont	suspension feeder	semi-infaunal	2	1	2	16	62	7068
Myophorella	Trigoniida	Myophorellidae	Myophorella	1	Early Toarcian		183	182	facultatively mobile	suspension feeder	infaunal	4	1	3	3	62	7068
Parallelodon hirsonensis	Arcida	Parallelodontidae	Parallelodon	2	Early Toarcian		183	182	stationary, attached	suspension feeder	epifaunal	2	1	1	4	62	7068
Parvamussium pumilum	Pectinida	Propeamussiidae	Parvamussium	2	Early Toarcian		183	182	facultatively mobile, unattached	carnivore	epifaunal	4	6	1	9	62	7068
Pinna (Pinna) opalina	Ostreida	Pinnidae	Pinna (Pinna)	5	Early Toarcian		183	182	stationary, attached	suspension feeder	semi-infaunal	2	1	2	16	62	7068
Plagiostoma	Pectinida	Limidae	Plagiostoma	1	Early Toarcian		183	182	stationary, attached	suspension feeder	low-level epifaunal	2	1	1	4	62	7068
Plicatula (Harpax) auricula	Pectinida	Plicatulidae	Plicatula (Harpax)	2	Early Toarcian		183	182	stationary, attached, epibiont	suspension feeder	epifaunal	2	1	1	4	62	7068
Pecten (Plesiopecten) subspinosus	Pectinida	Pectinidae	Pecten (Plesiopecten)	1	Early Toarcian		183	182	facultatively mobile	suspension feeder	epifaunal	4	1	1	7	62	7068
Actinostreon gregareum	Ostreida	Palaeolophidae	Actinostreon	1	Early Toarcian		183	182	cemented	suspension feeder	epifaunal	3	1	1	1	62	7068
Arcomytilus asper	Mytilida	Mytilidae	Arcomytilus	2	Early Toarcian		183	182	stationary, attached	suspension feeder	epifaunal	2	1	1	4	62	7068
Camptonectes (Camptonectes) auritus	Pectinida	Pectinidae	Camptonectes (Camptonectes)	3	Early Toarcian		183	182	stationary, attached	suspension feeder	low-level epifaunal	2	1	1	4	62	7068
Costigervillia	Ostreida	Bakevelliidae	Costigervillia	1	Early Toarcian		183	182	stationary, attached, epibiont	suspension feeder	epifaunal	2	1	1	4	62	7068
Ctenostreon rugosum	Pectinida	Limidae	Ctenostreon	1	Early Toarcian		183	182	stationary, attached	suspension feeder	low-level epifaunal	2	1	1	4	62	7068
Cucullaea (Idonearca) muensteri	Arcida	Cucullaeidae	Cucullaea (Idonearca)	5	Early Toarcian		183	182	facultatively mobile	suspension feeder	infaunal	4	1	3	3	62	7068
Eopecten velatus	Pectinida	Pectinidae	Eopecten	1	Early Toarcian		183	182	stationary, attached	suspension feeder	low-level epifaunal	2	1	1	4	62	7068
Gryphaea (Gryphaea) dumortieri	Ostreida	Gryphaeidae	Gryphaea (Gryphaea)	6	Early Toarcian		183	182	stationary, attached	suspension feeder	epifaunal	2	1	1	4	62	7068
Gryphaea (Bilobissa) sublobata	Ostreida	Gryphaeidae	Gryphaea (Bilobissa)	1	Early Toarcian		183	182	stationary, attached	suspension feeder	epifaunal	2	1	1	4	62	7068
Inoperna sowerbiana	Mytilida	Mytilidae	Inoperna	1	Early Toarcian		183	182	stationary, attached	suspension feeder	epifaunal	2	1	1	4	62	7068
Isocyprina	Veneroidei	Arcticidae	Isocyprina	2	Early Toarcian		183	182	facultatively mobile	suspension feeder	infaunal	4	1	3	3	62	7068
Nicaniella (Nicaniella) voltzi	Carditida	Astartidae	Nicaniella (Nicaniella)	1	Early Toarcian		183	182	facultatively mobile	suspension feeder	infaunal	4	1	3	3	62	7068
Parallelodon hirsonensis	Arcida	Parallelodontidae	Parallelodon	2	Early Toarcian		183	182	stationary, attached	suspension feeder	epifaunal	2	1	1	4	62	7068
Parvamussium pumilum	Pectinida	Propeamussiidae	Parvamussium	2	Early Toarcian		183	182	facultatively mobile, unattached	carnivore	epifaunal	4	6	1	9	62	7068
Actinostreon gregareum	Ostreida	Palaeolophidae	Actinostreon	5	Early Toarcian		183	182	cemented	suspension feeder	epifaunal	3	1	1	1	62	7068
Bositra buchi	Ostreida	Posidoniidae	Bositra	21	Early Toarcian		183	182	stationary, unattached	suspension feeder	epifaunal	1	1	1	12	62	7068
Camptonectes (Camptonectes) auritus	Pectinida	Pectinidae	Camptonectes (Camptonectes)	5	Early Toarcian		183	182	stationary, attached	suspension feeder	low-level epifaunal	2	1	1	4	62	7068
Coelopis (Coelopis)	Carditida	Astartidae	Coelopis (Coelopis)	2	Early Toarcian		183	182	slow motile	suspension feeder	infaunal	6	1	3	17	62	7068
Costigervillia	Ostreida	Bakevelliidae	Costigervillia	1	Early Toarcian		183	182	stationary, attached, epibiont	suspension feeder	epifaunal	2	1	1	4	62	7068
Cucullaea (Idonearca) muensteri	Arcida	Cucullaeidae	Cucullaea (Idonearca)	8	Early Toarcian		183	182	facultatively mobile	suspension feeder	infaunal	4	1	3	3	62	7068
Eopecten velatus	Pectinida	Pectinidae	Eopecten	2	Early Toarcian		183	182	stationary, attached	suspension feeder	low-level epifaunal	2	1	1	4	62	7068
Grammatodon concinnus	Arcida	Parallelodontidae	Grammatodon	1	Early Toarcian		183	182	stationary, attached	suspension feeder	epifaunal	2	1	1	4	62	7068
Gryphaea (Gryphaea) dumortieri	Ostreida	Gryphaeidae	Gryphaea (Gryphaea)	13	Early Toarcian		183	182	stationary, attached	suspension feeder	epifaunal	2	1	1	4	62	7068
Inoperna sowerbiana	Mytilida	Mytilidae	Inoperna	1	Early Toarcian		183	182	stationary, attached	suspension feeder	epifaunal	2	1	1	4	62	7068
Limea (Pseudolimea) cristata	Pectinida	Limidae	Pseudolimea	1	Early Toarcian		183	182	stationary, attached	suspension feeder	low-level epifaunal	2	1	1	4	62	7068
Myoconcha	Cardiida	Kalenteridae	Myoconcha	1	Early Toarcian		183	182	stationary, attached	suspension feeder	semi-infaunal	2	1	2	16	62	7068
Nicaniella (Nicaniella) voltzi	Carditida	Astartidae	Nicaniella (Nicaniella)	1	Early Toarcian		183	182	facultatively mobile	suspension feeder	infaunal	4	1	3	3	62	7068
Nuculana	Nuculanida	Nuculanidae	Nuculana	1	Early Toarcian		183	182	slow motile	deposit feeder, suspension feeder	infaunal	6	2	3	2	62	7068
Parallelodon hirsonensis	Arcida	Parallelodontidae	Parallelodon	3	Early Toarcian		183	182	stationary, attached	suspension feeder	epifaunal	2	1	1	4	62	7068
Parvamussium pumilum	Pectinida	Propeamussiidae	Parvamussium	2	Early Toarcian		183	182	facultatively mobile, unattached	carnivore	epifaunal	4	6	1	9	62	7068
Pinna (Pinna) folium	Ostreida	Pinnidae	Pinna (Pinna)	2	Early Toarcian		183	182	stationary, attached	suspension feeder	semi-infaunal	2	1	2	16	62	7068
Protocardia striatula	Cardiida	Cardiidae	Protocardia	2	Early Toarcian		183	182	facultatively mobile	suspension feeder	infaunal	4	1	3	3	62	7068
Trigonia (Trigonia)	Trigoniida	Trigoniidae	Trigonia (Trigonia)	1	Early Toarcian		183	182	facultatively mobile	suspension feeder	infaunal	4	1	3	3	62	7068
Mactromya cardioides	Lucinida	Mactromyidae	Mactromya	1	Early Toarcian		183	182	facultatively mobile	chemosymbiotic	deep infaunal	4	9	3	11	62	7068
Actinostreon gregareum	Ostreida	Palaeolophidae	Actinostreon	2	Early Toarcian		183	182	cemented	suspension feeder	epifaunal	3	1	1	1	62	7068
Camptonectes (Camptonectes) auritus	Pectinida	Pectinidae	Camptonectes (Camptonectes)	3	Early Toarcian		183	182	stationary, attached	suspension feeder	low-level epifaunal	2	1	1	4	62	7068
Grammatodon concinnus	Arcida	Parallelodontidae	Grammatodon	5	Early Toarcian		183	182	stationary, attached	suspension feeder	epifaunal	2	1	1	4	62	7068
Gryphaea (Gryphaea) dumortieri	Ostreida	Gryphaeidae	Gryphaea (Gryphaea)	1	Early Toarcian		183	182	stationary, attached	suspension feeder	epifaunal	2	1	1	4	62	7068
Homomya alsatica	Pholadomyida	Pholadomyidae	Homomya	9	Early Toarcian		183	182	facultatively mobile	suspension feeder	deep infaunal	4	1	3	3	62	7068
Isocyprina	Veneroidei	Arcticidae	Isocyprina	1	Early Toarcian		183	182	facultatively mobile	suspension feeder	infaunal	4	1	3	3	62	7068
Lima (Mantellum) duplicata	Pectinida	Limidae	Lima (Mantellum)	1	Early Toarcian		183	182	facultatively mobile	suspension feeder	epifaunal	2	1	1	4	62	7068
Myophorella	Trigoniida	Myophorellidae	Myophorella	3	Early Toarcian		183	182	facultatively mobile	suspension feeder	infaunal	4	1	3	3	62	7068
Parallelodon hirsonensis	Arcida	Parallelodontidae	Parallelodon	4	Early Toarcian		183	182	stationary, attached	suspension feeder	epifaunal	2	1	1	4	62	7068
Parvamussium pumilum	Pectinida	Propeamussiidae	Parvamussium	2	Early Toarcian		183	182	facultatively mobile, unattached	carnivore	epifaunal	4	6	1	9	62	7068
Plicatula (Harpax) auricula	Pectinida	Plicatulidae	Plicatula (Harpax)	8	Early Toarcian		183	182	stationary, attached, epibiont	suspension feeder	epifaunal	2	1	1	4	62	7068
Protocardia striatula	Cardiida	Cardiidae	Protocardia	1	Early Toarcian		183	182	facultatively mobile	suspension feeder	infaunal	4	1	3	3	62	7068
Homomya alsatica	Pholadomyida	Pholadomyidae	Homomya	1	Early Toarcian		183	182	facultatively mobile	suspension feeder	deep infaunal	4	1	3	3	62	7068
Cucullaea (Idonearca) muensteri	Arcida	Cucullaeidae	Cucullaea (Idonearca)	1	Early Toarcian	Middle Toarcian	183	175.6	facultatively mobile	suspension feeder	infaunal	4	1	3	3	62	7068
Entolium (Entolium) corneolum	Pectinida	Entoliidae	Entolium (Entolium)	2	Early Toarcian	Middle Toarcian	183	175.6	facultatively mobile	suspension feeder	epifaunal	4	1	1	7	62	7068
Homomya alsatica	Pholadomyida	Pholadomyidae	Homomya	7	Early Toarcian	Middle Toarcian	183	175.6	facultatively mobile	suspension feeder	deep infaunal	4	1	3	3	62	7068
Inoperna sowerbiana	Mytilida	Mytilidae	Inoperna	1	Early Toarcian	Middle Toarcian	183	175.6	stationary, attached	suspension feeder	epifaunal	2	1	1	4	62	7068
Nicaniella (Nicaniella) voltzi	Carditida	Astartidae	Nicaniella (Nicaniella)	2	Early Toarcian	Middle Toarcian	183	175.6	facultatively mobile	suspension feeder	infaunal	4	1	3	3	62	7068
Osteomya dilata	Pholadomyida	Pholadomyidae	Osteomya	3	Early Toarcian	Middle Toarcian	183	175.6	facultatively motile, unattached;	suspension feeder	shallow infaunal	4	1	3	3	62	7068
Parallelodon hirsonensis	Arcida	Parallelodontidae	Parallelodon	1	Early Toarcian	Middle Toarcian	183	175.6	stationary, attached	suspension feeder	epifaunal	2	1	1	4	62	7068
Parvamussium pumilum	Pectinida	Propeamussiidae	Parvamussium	1	Early Toarcian	Middle Toarcian	183	175.6	facultatively mobile, unattached	carnivore	epifaunal	4	6	1	9	62	7068
Pholadomya (Pholadomya) fidicula	Pholadomyida	Pholadomyidae	Pholadomya (Pholadomya)	2	Early Toarcian	Middle Toarcian	183	175.6	facultatively mobile	suspension feeder	deep infaunal	4	1	4	14	62	7068
Pholadomya (Pholadomya)	Pholadomyida	Pholadomyidae	Pholadomya (Pholadomya)	1	Early Toarcian	Middle Toarcian	183	175.6	facultatively mobile	suspension feeder	deep infaunal	4	1	4	14	62	7068
Protocardia striatula	Cardiida	Cardiidae	Protocardia	3	Early Toarcian	Middle Toarcian	183	175.6	facultatively mobile	suspension feeder	infaunal	4	1	3	3	62	7068
Trigonia (Trigonia)	Trigoniida	Trigoniidae	Trigonia (Trigonia)	2	Early Toarcian	Middle Toarcian	183	175.6	facultatively mobile	suspension feeder	infaunal	4	1	3	3	62	7068
Mactromya cardioides	Lucinida	Mactromyidae	Mactromya	7	Early Toarcian	Middle Toarcian	183	175.6	facultatively mobile	chemosymbiotic	deep infaunal	4	9	3	11	62	7068
Camptonectes (Camptonectes) auritus	Pectinida	Pectinidae	Camptonectes (Camptonectes)	4	Early Toarcian		183	182	stationary, attached	suspension feeder	low-level epifaunal	2	1	1	4	62	7068
Coelopis (Coelopis)	Carditida	Astartidae	Coelopis (Coelopis)	1	Early Toarcian		183	182	slow motile	suspension feeder	infaunal	6	1	3	17	62	7068
Eopecten velatus	Pectinida	Pectinidae	Eopecten	1	Early Toarcian		183	182	stationary, attached	suspension feeder	low-level epifaunal	2	1	1	4	62	7068
Grammatodon concinnus	Arcida	Parallelodontidae	Grammatodon	3	Early Toarcian		183	182	stationary, attached	suspension feeder	epifaunal	2	1	1	4	62	7068
Gryphaea (Bilobissa) sublobata	Ostreida	Gryphaeidae	Gryphaea (Bilobissa)	4	Early Toarcian		183	182	stationary, attached	suspension feeder	epifaunal	2	1	1	4	62	7068
Homomya alsatica	Pholadomyida	Pholadomyidae	Homomya	4	Early Toarcian		183	182	facultatively mobile	suspension feeder	deep infaunal	4	1	3	3	62	7068
Inoperna sowerbiana	Mytilida	Mytilidae	Inoperna	1	Early Toarcian		183	182	stationary, attached	suspension feeder	epifaunal	2	1	1	4	62	7068
Parallelodon hirsonensis	Arcida	Parallelodontidae	Parallelodon	3	Early Toarcian		183	182	stationary, attached	suspension feeder	epifaunal	2	1	1	4	62	7068
Pholadomya (Pholadomya)	Pholadomyida	Pholadomyidae	Pholadomya (Pholadomya)	1	Early Toarcian		183	182	facultatively mobile	suspension feeder	deep infaunal	4	1	4	14	62	7068
Plagiostoma punctatum	Pectinida	Limidae	Plagiostoma	4	Early Toarcian		183	182	stationary, attached	suspension feeder	low-level epifaunal	2	1	1	4	62	7068
Pterocardia	Cardiida	Pterocardiidae	Pterocardia	1	Early Toarcian		183	182	facultatively mobile	suspension feeder	infaunal	4	1	3	3	62	7068
Trigonia (Trigonia)	Trigoniida	Trigoniidae	Trigonia (Trigonia)	1	Early Toarcian		183	182	facultatively mobile	suspension feeder	infaunal	4	1	3	3	62	7068
Mactromya cardioides	Lucinida	Mactromyidae	Mactromya	3	Early Toarcian		183	182	facultatively mobile	chemosymbiotic	deep infaunal	4	9	3	11	62	7068
Coelopis (Coelopis)	Carditida	Astartidae	Coelopis (Coelopis)	1	Early Toarcian		183	182	slow motile	suspension feeder	infaunal	6	1	3	17	62	7068
Grammatodon concinnus	Arcida	Parallelodontidae	Grammatodon	7	Early Toarcian		183	182	stationary, attached	suspension feeder	epifaunal	2	1	1	4	62	7068
Homomya alsatica	Pholadomyida	Pholadomyidae	Homomya	3	Early Toarcian		183	182	facultatively mobile	suspension feeder	deep infaunal	4	1	3	3	62	7068
Inoperna sowerbiana	Mytilida	Mytilidae	Inoperna	5	Early Toarcian		183	182	stationary, attached	suspension feeder	epifaunal	2	1	1	4	62	7068
Modiolus (Modiolus) imbricatus	Mytilida	Mytilidae	Modiolus (Modiolus)	2	Early Toarcian		183	182	stationary, attached, epibiont	suspension feeder	semi-infaunal	2	1	2	16	62	7068
Pholadomya (Pholadomya)	Pholadomyida	Pholadomyidae	Pholadomya (Pholadomya)	1	Early Toarcian		183	182	facultatively mobile	suspension feeder	deep infaunal	4	1	4	14	62	7068
Plagiostoma punctatum	Pectinida	Limidae	Plagiostoma	1	Early Toarcian		183	182	stationary, attached	suspension feeder	low-level epifaunal	2	1	1	4	62	7068
Plicatula (Harpax) auricula	Pectinida	Plicatulidae	Plicatula (Harpax)	1	Early Toarcian		183	182	stationary, attached, epibiont	suspension feeder	epifaunal	2	1	1	4	62	7068
Mactromya cardioides	Lucinida	Mactromyidae	Mactromya	3	Early Toarcian		183	182	facultatively mobile	chemosymbiotic	deep infaunal	4	9	3	11	62	7068
Camptonectes (Camptonectes) auritus	Pectinida	Pectinidae	Camptonectes (Camptonectes)	1	Early Toarcian		183	182	stationary, attached	suspension feeder	low-level epifaunal	2	1	1	4	62	7068
Entolium (Entolium) corneolum	Pectinida	Entoliidae	Entolium (Entolium)	1	Early Toarcian		183	182	facultatively mobile	suspension feeder	epifaunal	4	1	1	7	62	7068
Eopecten velatus	Pectinida	Pectinidae	Eopecten	1	Early Toarcian		183	182	stationary, attached	suspension feeder	low-level epifaunal	2	1	1	4	62	7068
Grammatodon concinnus	Arcida	Parallelodontidae	Grammatodon	3	Early Toarcian		183	182	stationary, attached	suspension feeder	epifaunal	2	1	1	4	62	7068
Gryphaea (Gryphaea) dumortieri	Ostreida	Gryphaeidae	Gryphaea (Gryphaea)	3	Early Toarcian		183	182	stationary, attached	suspension feeder	epifaunal	2	1	1	4	62	7068
Homomya alsatica	Pholadomyida	Pholadomyidae	Homomya	2	Early Toarcian		183	182	facultatively mobile	suspension feeder	deep infaunal	4	1	3	3	62	7068
Inoperna sowerbiana	Mytilida	Mytilidae	Inoperna	2	Early Toarcian		183	182	stationary, attached	suspension feeder	epifaunal	2	1	1	4	62	7068
Myoconcha	Cardiida	Kalenteridae	Myoconcha	2	Early Toarcian		183	182	stationary, attached	suspension feeder	semi-infaunal	2	1	2	16	62	7068
Myophorella	Trigoniida	Myophorellidae	Myophorella	1	Early Toarcian		183	182	facultatively mobile	suspension feeder	infaunal	4	1	3	3	62	7068
Parallelodon hirsonensis	Arcida	Parallelodontidae	Parallelodon	1	Early Toarcian		183	182	stationary, attached	suspension feeder	epifaunal	2	1	1	4	62	7068
Plagiostoma punctatum	Pectinida	Limidae	Plagiostoma	1	Early Toarcian		183	182	stationary, attached	suspension feeder	low-level epifaunal	2	1	1	4	62	7068
Protocardia striatula	Cardiida	Cardiidae	Protocardia	1	Early Toarcian		183	182	facultatively mobile	suspension feeder	infaunal	4	1	3	3	62	7068
Mactromya cardioides	Lucinida	Mactromyidae	Mactromya	1	Early Toarcian		183	182	facultatively mobile	chemosymbiotic	deep infaunal	4	9	3	11	62	7068
Bakevellia (Bakevellia) waltoni	Ostreida	Bakevelliidae	Bakevellia (Bakevellia)	1	Early Toarcian		183	182	stationary	suspension feeder	semi-infaunal	2	1	2	16	62	7068
Camptonectes (Camptonectes) auritus	Pectinida	Pectinidae	Camptonectes (Camptonectes)	1	Early Toarcian		183	182	stationary, attached	suspension feeder	low-level epifaunal	2	1	1	4	62	7068
Entolium (Entolium) corneolum	Pectinida	Entoliidae	Entolium (Entolium)	1	Early Toarcian		183	182	facultatively mobile	suspension feeder	epifaunal	4	1	1	7	62	7068
Eopecten velatus	Pectinida	Pectinidae	Eopecten	2	Early Toarcian		183	182	stationary, attached	suspension feeder	low-level epifaunal	2	1	1	4	62	7068
Grammatodon concinnus	Arcida	Parallelodontidae	Grammatodon	4	Early Toarcian		183	182	stationary, attached	suspension feeder	epifaunal	2	1	1	4	62	7068
Gryphaea (Gryphaea) dumortieri	Ostreida	Gryphaeidae	Gryphaea (Gryphaea)	14	Early Toarcian		183	182	stationary, attached	suspension feeder	epifaunal	2	1	1	4	62	7068
Inoperna sowerbiana	Mytilida	Mytilidae	Inoperna	2	Early Toarcian		183	182	stationary, attached	suspension feeder	epifaunal	2	1	1	4	62	7068
Modiolus (Modiolus) imbricatus	Mytilida	Mytilidae	Modiolus (Modiolus)	1	Early Toarcian		183	182	stationary, attached, epibiont	suspension feeder	semi-infaunal	2	1	2	16	62	7068
Myophorella	Trigoniida	Myophorellidae	Myophorella	2	Early Toarcian		183	182	facultatively mobile	suspension feeder	infaunal	4	1	3	3	62	7068
Nuculana	Nuculanida	Nuculanidae	Nuculana	1	Early Toarcian		183	182	slow motile	deposit feeder, suspension feeder	infaunal	6	2	3	2	62	7068
Parallelodon hirsonensis	Arcida	Parallelodontidae	Parallelodon	1	Early Toarcian		183	182	stationary, attached	suspension feeder	epifaunal	2	1	1	4	62	7068
Parvamussium pumilum	Pectinida	Propeamussiidae	Parvamussium	2	Early Toarcian		183	182	facultatively mobile, unattached	carnivore	epifaunal	4	6	1	9	62	7068
Pholadomya (Pholadomya) fidicula	Pholadomyida	Pholadomyidae	Pholadomya (Pholadomya)	1	Early Toarcian		183	182	facultatively mobile	suspension feeder	deep infaunal	4	1	4	14	62	7068
Pholadomya (Pholadomya)	Pholadomyida	Pholadomyidae	Pholadomya (Pholadomya)	1	Early Toarcian		183	182	facultatively mobile	suspension feeder	deep infaunal	4	1	4	14	62	7068
Pinna (Pinna) opalina	Ostreida	Pinnidae	Pinna (Pinna)	1	Early Toarcian		183	182	stationary, attached	suspension feeder	semi-infaunal	2	1	2	16	62	7068
Plagiostoma punctatum	Pectinida	Limidae	Plagiostoma	2	Early Toarcian		183	182	stationary, attached	suspension feeder	low-level epifaunal	2	1	1	4	62	7068
Pleuromya uniformis	Pholadida	Pleuromyidae	Pleuromya	1	Early Toarcian		183	182	facultatively mobile	suspension feeder	deep infaunal	4	1	4	14	62	7068
Protocardia (Protocardia)	Cardiida	Cardiidae	Protocardia (Protocardia)	2	Early Toarcian		183	182	facultatively mobile	suspension feeder	infaunal	4	1	3	3	62	7068
Protocardia striatula	Cardiida	Cardiidae	Protocardia	1	Early Toarcian		183	182	facultatively mobile	suspension feeder	infaunal	4	1	3	3	62	7068
Trigonia (Trigonia)	Trigoniida	Trigoniidae	Trigonia (Trigonia)	1	Early Toarcian		183	182	facultatively mobile	suspension feeder	infaunal	4	1	3	3	62	7068
Mactromya cardioides	Lucinida	Mactromyidae	Mactromya	1	Early Toarcian		183	182	facultatively mobile	chemosymbiotic	deep infaunal	4	9	3	11	62	7068
Camptonectes (Camptonectes) auritus	Pectinida	Pectinidae	Camptonectes (Camptonectes)	1	Early Toarcian		183	182	stationary, attached	suspension feeder	low-level epifaunal	2	1	1	4	62	7068
Camptonectes subulatus	Pectinida	Pectinidae	Camptonectes	4	Early Toarcian		183	182	stationary, attached	suspension feeder	low-level epifaunal	2	1	1	4	62	7068
Grammatodon concinnus	Arcida	Parallelodontidae	Grammatodon	4	Early Toarcian		183	182	stationary, attached	suspension feeder	epifaunal	2	1	1	4	62	7068
Gryphaea (Gryphaea) dumortieri	Ostreida	Gryphaeidae	Gryphaea (Gryphaea)	4	Early Toarcian		183	182	stationary, attached	suspension feeder	epifaunal	2	1	1	4	62	7068
Homomya alsatica	Pholadomyida	Pholadomyidae	Homomya	9	Early Toarcian		183	182	facultatively mobile	suspension feeder	deep infaunal	4	1	3	3	62	7068
Inoperna sowerbiana	Mytilida	Mytilidae	Inoperna	1	Early Toarcian		183	182	stationary, attached	suspension feeder	epifaunal	2	1	1	4	62	7068
Lima (Mantellum) duplicata	Pectinida	Limidae	Lima (Mantellum)	2	Early Toarcian		183	182	facultatively mobile	suspension feeder	epifaunal	2	1	1	4	62	7068
Modiolus (Modiolus) imbricatus	Mytilida	Mytilidae	Modiolus (Modiolus)	2	Early Toarcian		183	182	stationary, attached, epibiont	suspension feeder	semi-infaunal	2	1	2	16	62	7068
Myoconcha	Cardiida	Kalenteridae	Myoconcha	1	Early Toarcian		183	182	stationary, attached	suspension feeder	semi-infaunal	2	1	2	16	62	7068
Nuculana	Nuculanida	Nuculanidae	Nuculana	1	Early Toarcian		183	182	slow motile	deposit feeder, suspension feeder	infaunal	6	2	3	2	62	7068
Parallelodon hirsonensis	Arcida	Parallelodontidae	Parallelodon	1	Early Toarcian		183	182	stationary, attached	suspension feeder	epifaunal	2	1	1	4	62	7068
Parvamussium pumilum	Pectinida	Propeamussiidae	Parvamussium	1	Early Toarcian		183	182	facultatively mobile, unattached	carnivore	epifaunal	4	6	1	9	62	7068
Pholadomya (Pholadomya) fidicula	Pholadomyida	Pholadomyidae	Pholadomya (Pholadomya)	6	Early Toarcian		183	182	facultatively mobile	suspension feeder	deep infaunal	4	1	4	14	62	7068
Pholadomya (Pholadomya)	Pholadomyida	Pholadomyidae	Pholadomya (Pholadomya)	1	Early Toarcian		183	182	facultatively mobile	suspension feeder	deep infaunal	4	1	4	14	62	7068
Plagiostoma punctatum	Pectinida	Limidae	Plagiostoma	1	Early Toarcian		183	182	stationary, attached	suspension feeder	low-level epifaunal	2	1	1	4	62	7068
Protocardia striatula	Cardiida	Cardiidae	Protocardia	2	Early Toarcian		183	182	facultatively mobile	suspension feeder	infaunal	4	1	3	3	62	7068
Pecten (Plesiopecten) subspinosus	Pectinida	Pectinidae	Pecten (Plesiopecten)	3	Early Toarcian		183	182	facultatively mobile	suspension feeder	epifaunal	4	1	1	7	62	7068
Trigonia (Trigonia)	Trigoniida	Trigoniidae	Trigonia (Trigonia)	1	Early Toarcian		183	182	facultatively mobile	suspension feeder	infaunal	4	1	3	3	62	7068
Camptonectes (Camptonectes) auritus	Pectinida	Pectinidae	Camptonectes (Camptonectes)	1	Early Toarcian		183	182	stationary, attached	suspension feeder	low-level epifaunal	2	1	1	4	62	7068
Coelopis (Coelopis)	Carditida	Astartidae	Coelopis (Coelopis)	1	Early Toarcian		183	182	slow motile	suspension feeder	infaunal	6	1	3	17	62	7068
Gryphaea (Gryphaea) dumortieri	Ostreida	Gryphaeidae	Gryphaea (Gryphaea)	1	Early Toarcian		183	182	stationary, attached	suspension feeder	epifaunal	2	1	1	4	62	7068
Homomya alsatica	Pholadomyida	Pholadomyidae	Homomya	1	Early Toarcian		183	182	facultatively mobile	suspension feeder	deep infaunal	4	1	3	3	62	7068
Inoperna sowerbiana	Mytilida	Mytilidae	Inoperna	3	Early Toarcian		183	182	stationary, attached	suspension feeder	epifaunal	2	1	1	4	62	7068
Isocyprina	Veneroidei	Arcticidae	Isocyprina	1	Early Toarcian		183	182	facultatively mobile	suspension feeder	infaunal	4	1	3	3	62	7068
Myophorella	Trigoniida	Myophorellidae	Myophorella	2	Early Toarcian		183	182	facultatively mobile	suspension feeder	infaunal	4	1	3	3	62	7068
Parallelodon hirsonensis	Arcida	Parallelodontidae	Parallelodon	1	Early Toarcian		183	182	stationary, attached	suspension feeder	epifaunal	2	1	1	4	62	7068
Pecten (Plesiopecten) subspinosus	Pectinida	Pectinidae	Pecten (Plesiopecten)	1	Early Toarcian		183	182	facultatively mobile	suspension feeder	epifaunal	4	1	1	7	62	7068
Coelopis (Coelopis)	Carditida	Astartidae	Coelopis (Coelopis)	2	Early Toarcian		183	182	slow motile	suspension feeder	infaunal	6	1	3	17	62	7068
Costigervillia	Ostreida	Bakevelliidae	Costigervillia	1	Early Toarcian		183	182	stationary, attached, epibiont	suspension feeder	epifaunal	2	1	1	4	62	7068
Entolium (Entolium) corneolum	Pectinida	Entoliidae	Entolium (Entolium)	3	Early Toarcian		183	182	facultatively mobile	suspension feeder	epifaunal	4	1	1	7	62	7068
Eopecten velatus	Pectinida	Pectinidae	Eopecten	1	Early Toarcian		183	182	stationary, attached	suspension feeder	low-level epifaunal	2	1	1	4	62	7068
Girardotia	Pholadomyida	Pholadomyidae	Girardotia	1	Early Toarcian		183	182	facultatively mobile	suspension feeder	deep infaunal	4	1	4	14	62	7068
Grammatodon concinnus	Arcida	Parallelodontidae	Grammatodon	1	Early Toarcian		183	182	stationary, attached	suspension feeder	epifaunal	2	1	1	4	62	7068
Gryphaea (Gryphaea) dumortieri	Ostreida	Gryphaeidae	Gryphaea (Gryphaea)	3	Early Toarcian		183	182	stationary, attached	suspension feeder	epifaunal	2	1	1	4	62	7068
Inoperna sowerbiana	Mytilida	Mytilidae	Inoperna	4	Early Toarcian		183	182	stationary, attached	suspension feeder	epifaunal	2	1	1	4	62	7068
Lima (Mantellum) duplicata	Pectinida	Limidae	Lima (Mantellum)	1	Early Toarcian		183	182	facultatively mobile	suspension feeder	epifaunal	2	1	1	4	62	7068
Modiolus	Mytilida	Mytilidae	Modiolus	1	Early Toarcian		183	182	stationary, attached, epibiont	suspension feeder	semi-infaunal	2	1	2	16	62	7068
Myoconcha	Cardiida	Kalenteridae	Myoconcha	2	Early Toarcian		183	182	stationary, attached	suspension feeder	semi-infaunal	2	1	2	16	62	7068
Myophorella	Trigoniida	Myophorellidae	Myophorella	1	Early Toarcian		183	182	facultatively mobile	suspension feeder	infaunal	4	1	3	3	62	7068
Nanogyra monoptera	Ostreida	Gryphaeidae	Nanogyra	3	Early Toarcian		183	182	stationary, attached	suspension feeder	epifaunal	2	1	1	4	62	7068
Osteomya dilata	Pholadomyida	Pholadomyidae	Osteomya	2	Early Toarcian		183	182	facultatively motile, unattached;	suspension feeder	shallow infaunal	4	1	3	3	62	7068
Parallelodon hirsonensis	Arcida	Parallelodontidae	Parallelodon	3	Early Toarcian		183	182	stationary, attached	suspension feeder	epifaunal	2	1	1	4	62	7068
Parvamussium pumilum	Pectinida	Propeamussiidae	Parvamussium	3	Early Toarcian		183	182	facultatively mobile, unattached	carnivore	epifaunal	4	6	1	9	62	7068
Pholadomya (Pholadomya) fidicula	Pholadomyida	Pholadomyidae	Pholadomya (Pholadomya)	1	Early Toarcian		183	182	facultatively mobile	suspension feeder	deep infaunal	4	1	4	14	62	7068
Pleuromya uniformis	Pholadida	Pleuromyidae	Pleuromya	2	Early Toarcian		183	182	facultatively mobile	suspension feeder	deep infaunal	4	1	4	14	62	7068
Protocardia (Protocardia)	Cardiida	Cardiidae	Protocardia (Protocardia)	1	Early Toarcian		183	182	facultatively mobile	suspension feeder	infaunal	4	1	3	3	62	7068
Protocardia striatula	Cardiida	Cardiidae	Protocardia	1	Early Toarcian		183	182	facultatively mobile	suspension feeder	infaunal	4	1	3	3	62	7068
Pecten (Plesiopecten) subspinosus	Pectinida	Pectinidae	Pecten (Plesiopecten)	2	Early Toarcian		183	182	facultatively mobile	suspension feeder	epifaunal	4	1	1	7	62	7068
Mactromya cardioides	Lucinida	Mactromyidae	Mactromya	3	Early Toarcian		183	182	facultatively mobile	chemosymbiotic	deep infaunal	4	9	3	11	62	7068
Camptonectes (Camptonectes) auritus	Pectinida	Pectinidae	Camptonectes (Camptonectes)	1	Early Toarcian		183	182	stationary, attached	suspension feeder	low-level epifaunal	2	1	1	4	62	7068
Camptonectes subulatus	Pectinida	Pectinidae	Camptonectes	1	Early Toarcian		183	182	stationary, attached	suspension feeder	low-level epifaunal	2	1	1	4	62	7068
Chlamys textoria	Pectinida	Pectinidae	Chlamys	1	Early Toarcian		183	182	facultatively mobile, unattached	suspension feeder	epifaunal	4	1	1	7	62	7068
Coelopis (Coelopis)	Carditida	Astartidae	Coelopis (Coelopis)	1	Early Toarcian		183	182	slow motile	suspension feeder	infaunal	6	1	3	17	62	7068
Ctenostreon rugosum	Pectinida	Limidae	Ctenostreon	1	Early Toarcian		183	182	stationary, attached	suspension feeder	low-level epifaunal	2	1	1	4	62	7068
Eopecten velatus	Pectinida	Pectinidae	Eopecten	1	Early Toarcian		183	182	stationary, attached	suspension feeder	low-level epifaunal	2	1	1	4	62	7068
Girardotia	Pholadomyida	Pholadomyidae	Girardotia	1	Early Toarcian		183	182	facultatively mobile	suspension feeder	deep infaunal	4	1	4	14	62	7068
Grammatodon concinnus	Arcida	Parallelodontidae	Grammatodon	2	Early Toarcian		183	182	stationary, attached	suspension feeder	epifaunal	2	1	1	4	62	7068
Homomya alsatica	Pholadomyida	Pholadomyidae	Homomya	3	Early Toarcian		183	182	facultatively mobile	suspension feeder	deep infaunal	4	1	3	3	62	7068
Isocyprina	Veneroidei	Arcticidae	Isocyprina	1	Early Toarcian		183	182	facultatively mobile	suspension feeder	infaunal	4	1	3	3	62	7068
Modiolus (Modiolus) imbricatus	Mytilida	Mytilidae	Modiolus (Modiolus)	2	Early Toarcian		183	182	stationary, attached, epibiont	suspension feeder	semi-infaunal	2	1	2	16	62	7068
Parallelodon hirsonensis	Arcida	Parallelodontidae	Parallelodon	1	Early Toarcian		183	182	stationary, attached	suspension feeder	epifaunal	2	1	1	4	62	7068
Parvamussium pumilum	Pectinida	Propeamussiidae	Parvamussium	1	Early Toarcian		183	182	facultatively mobile, unattached	carnivore	epifaunal	4	6	1	9	62	7068
Pholadomya (Pholadomya) fidicula	Pholadomyida	Pholadomyidae	Pholadomya (Pholadomya)	2	Early Toarcian		183	182	facultatively mobile	suspension feeder	deep infaunal	4	1	4	14	62	7068
Pinna (Pinna) opalina	Ostreida	Pinnidae	Pinna (Pinna)	2	Early Toarcian		183	182	stationary, attached	suspension feeder	semi-infaunal	2	1	2	16	62	7068
Protocardia striatula	Cardiida	Cardiidae	Protocardia	1	Early Toarcian		183	182	facultatively mobile	suspension feeder	infaunal	4	1	3	3	62	7068
Trichites	Ostreida	Pinnidae	Trichites	1	Early Toarcian		183	182	stationary, attached	suspension feeder	semi-infaunal	2	1	2	16	62	7068
Mactromya cardioides	Lucinida	Mactromyidae	Mactromya	1	Early Toarcian		183	182	facultatively mobile	chemosymbiotic	deep infaunal	4	9	3	11	62	7068
Anisocardia	Veneroidei	Arcticidae	Anisocardia	2	Middle Toarcian		182	175.6	facultatively mobile	suspension feeder	infaunal	4	1	3	3	62	7068
Coelopis (Coelopis)	Carditida	Astartidae	Coelopis (Coelopis)	1	Middle Toarcian		182	175.6	slow motile	suspension feeder	infaunal	6	1	3	17	62	7068
Girardotia	Pholadomyida	Pholadomyidae	Girardotia	1	Middle Toarcian		182	175.6	facultatively mobile	suspension feeder	deep infaunal	4	1	4	14	62	7068
Grammatodon concinnus	Arcida	Parallelodontidae	Grammatodon	4	Middle Toarcian		182	175.6	stationary, attached	suspension feeder	epifaunal	2	1	1	4	62	7068
Isocyprina	Veneroidei	Arcticidae	Isocyprina	1	Middle Toarcian		182	175.6	facultatively mobile	suspension feeder	infaunal	4	1	3	3	62	7068
Lima (Mantellum) duplicata	Pectinida	Limidae	Lima (Mantellum)	1	Middle Toarcian		182	175.6	facultatively mobile	suspension feeder	epifaunal	2	1	1	4	62	7068
Myoconcha	Cardiida	Kalenteridae	Myoconcha	1	Middle Toarcian		182	175.6	stationary, attached	suspension feeder	semi-infaunal	2	1	2	16	62	7068
Neocrassina elegans	Carditida	Astartidae	Neocrassina	1	Middle Toarcian		182	175.6	facultatively mobile	suspension feeder	infaunal	4	1	3	3	62	7068
Nuculana	Nuculanida	Nuculanidae	Nuculana	1	Middle Toarcian		182	175.6	slow motile	deposit feeder, suspension feeder	infaunal	6	2	3	2	62	7068
Parallelodon hirsonensis	Arcida	Parallelodontidae	Parallelodon	3	Middle Toarcian		182	175.6	stationary, attached	suspension feeder	epifaunal	2	1	1	4	62	7068
Parvamussium pumilum	Pectinida	Propeamussiidae	Parvamussium	3	Middle Toarcian		182	175.6	facultatively mobile, unattached	carnivore	epifaunal	4	6	1	9	62	7068
Grammatodon concinnus	Arcida	Parallelodontidae	Grammatodon	1	Middle Toarcian		182	175.6	stationary, attached	suspension feeder	epifaunal	2	1	1	4	62	7068
Homomya alsatica	Pholadomyida	Pholadomyidae	Homomya	2	Middle Toarcian		182	175.6	facultatively mobile	suspension feeder	deep infaunal	4	1	3	3	62	7068
Parvamussium pumilum	Pectinida	Propeamussiidae	Parvamussium	1	Middle Toarcian		182	175.6	facultatively mobile, unattached	carnivore	epifaunal	4	6	1	9	62	7068
Plagiostoma punctatum	Pectinida	Limidae	Plagiostoma	1	Middle Toarcian		182	175.6	stationary, attached	suspension feeder	low-level epifaunal	2	1	1	4	62	7068
Actinostreon gregareum	Ostreida	Palaeolophidae	Actinostreon	1	Middle Toarcian		182	175.6	cemented	suspension feeder	epifaunal	3	1	1	1	62	7068
Chlamys textoria	Pectinida	Pectinidae	Chlamys	1	Middle Toarcian		182	175.6	facultatively mobile, unattached	suspension feeder	epifaunal	4	1	1	7	62	7068
Coelopis (Coelopis)	Carditida	Astartidae	Coelopis (Coelopis)	2	Middle Toarcian		182	175.6	slow motile	suspension feeder	infaunal	6	1	3	17	62	7068
Ctenostreon rugosum	Pectinida	Limidae	Ctenostreon	1	Middle Toarcian		182	175.6	stationary, attached	suspension feeder	low-level epifaunal	2	1	1	4	62	7068
Eopecten velatus	Pectinida	Pectinidae	Eopecten	1	Middle Toarcian		182	175.6	stationary, attached	suspension feeder	low-level epifaunal	2	1	1	4	62	7068
Grammatodon concinnus	Arcida	Parallelodontidae	Grammatodon	4	Middle Toarcian		182	175.6	stationary, attached	suspension feeder	epifaunal	2	1	1	4	62	7068
Gryphaea (Gryphaea) dumortieri	Ostreida	Gryphaeidae	Gryphaea (Gryphaea)	1	Middle Toarcian		182	175.6	stationary, attached	suspension feeder	epifaunal	2	1	1	4	62	7068
Lima (Mantellum) duplicata	Pectinida	Limidae	Lima (Mantellum)	1	Middle Toarcian		182	175.6	facultatively mobile	suspension feeder	epifaunal	2	1	1	4	62	7068
Palaeonucula	Nuculida	Nuculidae	Palaeonucula	1	Middle Toarcian		182	175.6	slow motile	deposit feeder, suspension feeder	infaunal	6	2	3	2	62	7068
Parallelodon hirsonensis	Arcida	Parallelodontidae	Parallelodon	1	Middle Toarcian		182	175.6	stationary, attached	suspension feeder	epifaunal	2	1	1	4	62	7068
Parvamussium pumilum	Pectinida	Propeamussiidae	Parvamussium	2	Middle Toarcian		182	175.6	facultatively mobile, unattached	carnivore	epifaunal	4	6	1	9	62	7068
Plagiostoma punctatum	Pectinida	Limidae	Plagiostoma	5	Middle Toarcian		182	175.6	stationary, attached	suspension feeder	low-level epifaunal	2	1	1	4	62	7068
Protocardia striatula	Cardiida	Cardiidae	Protocardia	1	Middle Toarcian		182	175.6	facultatively mobile	suspension feeder	infaunal	4	1	3	3	62	7068
Trichites	Ostreida	Pinnidae	Trichites	1	Middle Toarcian		182	175.6	stationary, attached	suspension feeder	semi-infaunal	2	1	2	16	62	7068
Camptonectes subulatus	Pectinida	Pectinidae	Camptonectes	1	Middle Toarcian		182	175.6	stationary, attached	suspension feeder	low-level epifaunal	2	1	1	4	62	7068
Coelopis (Coelopis)	Carditida	Astartidae	Coelopis (Coelopis)	4	Middle Toarcian		182	175.6	slow motile	suspension feeder	infaunal	6	1	3	17	62	7068
Grammatodon concinnus	Arcida	Parallelodontidae	Grammatodon	2	Middle Toarcian		182	175.6	stationary, attached	suspension feeder	epifaunal	2	1	1	4	62	7068
Inoperna sowerbiana	Mytilida	Mytilidae	Inoperna	1	Middle Toarcian		182	175.6	stationary, attached	suspension feeder	epifaunal	2	1	1	4	62	7068
Isocyprina	Veneroidei	Arcticidae	Isocyprina	1	Middle Toarcian		182	175.6	facultatively mobile	suspension feeder	infaunal	4	1	3	3	62	7068
Lima (Mantellum) duplicata	Pectinida	Limidae	Lima (Mantellum)	2	Middle Toarcian		182	175.6	facultatively mobile	suspension feeder	epifaunal	2	1	1	4	62	7068
Nicaniella (Nicaniella) voltzi	Carditida	Astartidae	Nicaniella (Nicaniella)	1	Middle Toarcian		182	175.6	facultatively mobile	suspension feeder	infaunal	4	1	3	3	62	7068
Nuculana	Nuculanida	Nuculanidae	Nuculana	1	Middle Toarcian		182	175.6	slow motile	deposit feeder, suspension feeder	infaunal	6	2	3	2	62	7068
Parallelodon hirsonensis	Arcida	Parallelodontidae	Parallelodon	2	Middle Toarcian		182	175.6	stationary, attached	suspension feeder	epifaunal	2	1	1	4	62	7068
Parvamussium pumilum	Pectinida	Propeamussiidae	Parvamussium	2	Middle Toarcian		182	175.6	facultatively mobile, unattached	carnivore	epifaunal	4	6	1	9	62	7068
Pinna (Pinna) folium	Ostreida	Pinnidae	Pinna (Pinna)	1	Middle Toarcian		182	175.6	stationary, attached	suspension feeder	semi-infaunal	2	1	2	16	62	7068
Trigonia (Trigonia)	Trigoniida	Trigoniidae	Trigonia (Trigonia)	1	Middle Toarcian		182	175.6	facultatively mobile	suspension feeder	infaunal	4	1	3	3	62	7068
Actinostreon gregareum	Ostreida	Palaeolophidae	Actinostreon	1	Middle Toarcian		182	175.6	cemented	suspension feeder	epifaunal	3	1	1	1	62	7068
Bakevellia (Bakevellia) waltoni	Ostreida	Bakevelliidae	Bakevellia (Bakevellia)	1	Middle Toarcian		182	175.6	stationary	suspension feeder	semi-infaunal	2	1	2	16	62	7068
Bositra buchi	Ostreida	Posidoniidae	Bositra	4	Middle Toarcian		182	175.6	stationary, unattached	suspension feeder	epifaunal	1	1	1	12	62	7068
Camptonectes (Camptonectes) auritus	Pectinida	Pectinidae	Camptonectes (Camptonectes)	11	Middle Toarcian		182	175.6	stationary, attached	suspension feeder	low-level epifaunal	2	1	1	4	62	7068
Ceratomya concentrica	Pholadida	Ceratomyidae	Ceratomya	1	Middle Toarcian		182	175.6	facultatively mobile	suspension feeder	infaunal	4	1	3	3	62	7068
Isognomon	Ostreida	Malleidae	Isognomon	1	Middle Toarcian		182	175.6	stationary, attached	suspension feeder	epifaunal	2	1	1	4	62	7068
Lima (Mantellum) duplicata	Pectinida	Limidae	Lima (Mantellum)	3	Middle Toarcian		182	175.6	facultatively mobile	suspension feeder	epifaunal	2	1	1	4	62	7068
Lithophaga (Lithophaga)	Mytilida	Mytilidae	Lithophaga (Lithophaga)	4	Middle Toarcian		182	175.6	stationary, attached	suspension feeder	boring	2	1	2	16	62	7068
Parvamussium pumilum	Pectinida	Propeamussiidae	Parvamussium	8	Middle Toarcian		182	175.6	facultatively mobile, unattached	carnivore	epifaunal	4	6	1	9	62	7068
Plagiostoma giganteum	Pectinida	Limidae	Plagiostoma	1	Middle Toarcian		182	175.6	stationary, attached	suspension feeder	low-level epifaunal	2	1	1	4	62	7068
Plagiostoma punctatum	Pectinida	Limidae	Plagiostoma	2	Middle Toarcian		182	175.6	stationary, attached	suspension feeder	low-level epifaunal	2	1	1	4	62	7068
Pecten (Plesiopecten) subspinosus	Pectinida	Pectinidae	Pecten (Plesiopecten)	1	Middle Toarcian		182	175.6	facultatively mobile	suspension feeder	epifaunal	4	1	1	7	62	7068
Bakevellia (Bakevellia) waltoni	Ostreida	Bakevelliidae	Bakevellia (Bakevellia)	2	Middle Toarcian		182	175.6	stationary	suspension feeder	semi-infaunal	2	1	2	16	62	7068
Camptonectes subulatus	Pectinida	Pectinidae	Camptonectes	1	Middle Toarcian		182	175.6	stationary, attached	suspension feeder	low-level epifaunal	2	1	1	4	62	7068
Gervillella	Ostreida	Bakevelliidae	Gervillella	1	Middle Toarcian		182	175.6	stationary	suspension feeder	semi-infaunal	2	1	2	16	62	7068
Neocrassina elegans	Carditida	Astartidae	Neocrassina	3	Middle Toarcian		182	175.6	facultatively mobile	suspension feeder	infaunal	4	1	3	3	62	7068
Parallelodon hirsonensis	Arcida	Parallelodontidae	Parallelodon	1	Middle Toarcian		182	175.6	stationary, attached	suspension feeder	epifaunal	2	1	1	4	62	7068
Pinna (Pinna) folium	Ostreida	Pinnidae	Pinna (Pinna)	1	Middle Toarcian		182	175.6	stationary, attached	suspension feeder	semi-infaunal	2	1	2	16	62	7068
Grammatodon concinnus	Arcida	Parallelodontidae	Grammatodon	1	Middle Toarcian		182	175.6	stationary, attached	suspension feeder	epifaunal	2	1	1	4	62	7068
Homomya alsatica	Pholadomyida	Pholadomyidae	Homomya	1	Middle Toarcian		182	175.6	facultatively mobile	suspension feeder	deep infaunal	4	1	3	3	62	7068
Lima (Mantellum) duplicata	Pectinida	Limidae	Lima (Mantellum)	1	Middle Toarcian		182	175.6	facultatively mobile	suspension feeder	epifaunal	2	1	1	4	62	7068
Myophorella	Trigoniida	Myophorellidae	Myophorella	1	Middle Toarcian		182	175.6	facultatively mobile	suspension feeder	infaunal	4	1	3	3	62	7068
Neocrassina elegans	Carditida	Astartidae	Neocrassina	1	Middle Toarcian		182	175.6	facultatively mobile	suspension feeder	infaunal	4	1	3	3	62	7068
Parvamussium pumilum	Pectinida	Propeamussiidae	Parvamussium	3	Middle Toarcian		182	175.6	facultatively mobile, unattached	carnivore	epifaunal	4	6	1	9	62	7068
Bositra buchi	Ostreida	Posidoniidae	Bositra	1	Middle Toarcian		182	175.6	stationary, unattached	suspension feeder	epifaunal	1	1	1	12	62	7068
Camptonectes (Camptonectes) auritus	Pectinida	Pectinidae	Camptonectes (Camptonectes)	2	Middle Toarcian		182	175.6	stationary, attached	suspension feeder	low-level epifaunal	2	1	1	4	62	7068
Coelopis (Coelopis)	Carditida	Astartidae	Coelopis (Coelopis)	1	Middle Toarcian		182	175.6	slow motile	suspension feeder	infaunal	6	1	3	17	62	7068
Gervillella	Ostreida	Bakevelliidae	Gervillella	2	Middle Toarcian		182	175.6	stationary	suspension feeder	semi-infaunal	2	1	2	16	62	7068
Isognomon	Ostreida	Malleidae	Isognomon	1	Middle Toarcian		182	175.6	stationary, attached	suspension feeder	epifaunal	2	1	1	4	62	7068
Lycettia	Mytilida	Mytilidae	Lycettia	1	Middle Toarcian		182	175.6	stationary, attached	suspension feeder	epifaunal	2	1	1	4	62	7068
Neocrassina elegans	Carditida	Astartidae	Neocrassina	2	Middle Toarcian		182	175.6	facultatively mobile	suspension feeder	infaunal	4	1	3	3	62	7068
Parvamussium pumilum	Pectinida	Propeamussiidae	Parvamussium	1	Middle Toarcian		182	175.6	facultatively mobile, unattached	carnivore	epifaunal	4	6	1	9	62	7068
Pholadomya (Pholadomya)	Pholadomyida	Pholadomyidae	Pholadomya (Pholadomya)	1	Middle Toarcian		182	175.6	facultatively mobile	suspension feeder	deep infaunal	4	1	4	14	62	7068
Plagiostoma punctatum	Pectinida	Limidae	Plagiostoma	3	Middle Toarcian		182	175.6	stationary, attached	suspension feeder	low-level epifaunal	2	1	1	4	62	7068
Coelopis (Coelopis)	Carditida	Astartidae	Coelopis (Coelopis)	2	Middle Toarcian		182	175.6	slow motile	suspension feeder	infaunal	6	1	3	17	62	7068
Girardotia	Pholadomyida	Pholadomyidae	Girardotia	1	Middle Toarcian		182	175.6	facultatively mobile	suspension feeder	deep infaunal	4	1	4	14	62	7068
Lima (Mantellum) duplicata	Pectinida	Limidae	Lima (Mantellum)	1	Middle Toarcian		182	175.6	facultatively mobile	suspension feeder	epifaunal	2	1	1	4	62	7068
Neocrassina elegans	Carditida	Astartidae	Neocrassina	3	Middle Toarcian		182	175.6	facultatively mobile	suspension feeder	infaunal	4	1	3	3	62	7068
Nicaniella (Nicaniella)	Carditida	Astartidae	Nicaniella (Nicaniella)	2	Middle Toarcian		182	175.6	facultatively mobile	suspension feeder	infaunal	4	1	3	3	62	7068
Parallelodon hirsonensis	Arcida	Parallelodontidae	Parallelodon	2	Middle Toarcian		182	175.6	stationary, attached	suspension feeder	epifaunal	2	1	1	4	62	7068
Ceratomya concentrica	Pholadida	Ceratomyidae	Ceratomya	1	Middle Toarcian		182	175.6	facultatively mobile	suspension feeder	infaunal	4	1	3	3	62	7068
Coelopis (Coelopis)	Carditida	Astartidae	Coelopis (Coelopis)	1	Middle Toarcian		182	175.6	slow motile	suspension feeder	infaunal	6	1	3	17	62	7068
Homomya alsatica	Pholadomyida	Pholadomyidae	Homomya	1	Middle Toarcian		182	175.6	facultatively mobile	suspension feeder	deep infaunal	4	1	3	3	62	7068
Lima (Mantellum) duplicata	Pectinida	Limidae	Lima (Mantellum)	1	Middle Toarcian		182	175.6	facultatively mobile	suspension feeder	epifaunal	2	1	1	4	62	7068
Nicaniella (Nicaniella) voltzi	Carditida	Astartidae	Nicaniella (Nicaniella)	1	Middle Toarcian		182	175.6	facultatively mobile	suspension feeder	infaunal	4	1	3	3	62	7068
Pholadomya (Pholadomya)	Pholadomyida	Pholadomyidae	Pholadomya (Pholadomya)	1	Middle Toarcian		182	175.6	facultatively mobile	suspension feeder	deep infaunal	4	1	4	14	62	7068
Coelopis (Coelopis)	Carditida	Astartidae	Coelopis (Coelopis)	4	Middle Toarcian		182	175.6	slow motile	suspension feeder	infaunal	6	1	3	17	62	7068
Lima (Mantellum) duplicata	Pectinida	Limidae	Lima (Mantellum)	1	Middle Toarcian		182	175.6	facultatively mobile	suspension feeder	epifaunal	2	1	1	4	62	7068
Parvamussium pumilum	Pectinida	Propeamussiidae	Parvamussium	1	Middle Toarcian		182	175.6	facultatively mobile, unattached	carnivore	epifaunal	4	6	1	9	62	7068
Pholadomya (Pholadomya)	Pholadomyida	Pholadomyidae	Pholadomya (Pholadomya)	1	Middle Toarcian		182	175.6	facultatively mobile	suspension feeder	deep infaunal	4	1	4	14	62	7068
Entolium (Entolium) corneolum	Pectinida	Entoliidae	Entolium (Entolium)	1	Middle Toarcian		182	175.6	facultatively mobile	suspension feeder	epifaunal	4	1	1	7	62	7068
Lima (Mantellum) duplicata	Pectinida	Limidae	Lima (Mantellum)	1	Middle Toarcian		182	175.6	facultatively mobile	suspension feeder	epifaunal	2	1	1	4	62	7068
Pterocardia	Cardiida	Pterocardiidae	Pterocardia	1	Middle Toarcian		182	175.6	facultatively mobile	suspension feeder	infaunal	4	1	3	3	62	7068
Gryphaea (Bilobissa) sublobata	Ostreida	Gryphaeidae	Gryphaea (Bilobissa)	4	Early Toarcian		183	182	stationary, attached	suspension feeder	epifaunal	2	1	1	4	62	7068
Limea (Pseudolimea) roemeri	Pectinida	Limidae	Pseudolimea	1	Early Toarcian		183	182	stationary, attached	suspension feeder	low-level epifaunal	2	1	1	4	62	7068
Pleuromya aequistriata	Pholadida	Pleuromyidae	Pleuromya	1	Early Toarcian		183	182	facultatively mobile	suspension feeder	deep infaunal	4	1	4	14	62	7068
Plicatula (Harpax) spinosa	Pectinida	Plicatulidae	Plicatula (Harpax)	5	Early Toarcian		183	182	stationary, attached, epibiont	suspension feeder	epifaunal	2	1	1	4	62	7068
Camptonectes subulatus	Pectinida	Pectinidae	Camptonectes	1	Early Toarcian		183	182	stationary, attached	suspension feeder	low-level epifaunal	2	1	1	4	62	7068
Entolium (Entolium) corneolum	Pectinida	Entoliidae	Entolium (Entolium)	1	Early Toarcian		183	182	facultatively mobile	suspension feeder	epifaunal	4	1	1	7	62	7068
Gervillella	Ostreida	Bakevelliidae	Gervillella	1	Early Toarcian		183	182	stationary	suspension feeder	semi-infaunal	2	1	2	16	62	7068
Grammatodon concinnus	Arcida	Parallelodontidae	Grammatodon	1	Early Toarcian		183	182	stationary, attached	suspension feeder	epifaunal	2	1	1	4	62	7068
Gryphaea (Bilobissa) sublobata	Ostreida	Gryphaeidae	Gryphaea (Bilobissa)	1	Early Toarcian		183	182	stationary, attached	suspension feeder	epifaunal	2	1	1	4	62	7068
Homomya alsatica	Pholadomyida	Pholadomyidae	Homomya	1	Early Toarcian		183	182	facultatively mobile	suspension feeder	deep infaunal	4	1	3	3	62	7068
Homomya ventricosa	Pholadomyida	Pholadomyidae	Homomya	1	Early Toarcian		183	182	facultatively mobile	suspension feeder	deep infaunal	4	1	3	3	62	7068
Limea (Pseudolimea) roemeri	Pectinida	Limidae	Pseudolimea	3	Early Toarcian		183	182	stationary, attached	suspension feeder	low-level epifaunal	2	1	1	4	62	7068
Nicaniella (Nicaniella) voltzi	Carditida	Astartidae	Nicaniella (Nicaniella)	1	Early Toarcian		183	182	facultatively mobile	suspension feeder	infaunal	4	1	3	3	62	7068
Nuculana	Nuculanida	Nuculanidae	Nuculana	1	Early Toarcian		183	182	slow motile	deposit feeder, suspension feeder	infaunal	6	2	3	2	62	7068
Pholadomya (Pholadomya)	Pholadomyida	Pholadomyidae	Pholadomya (Pholadomya)	1	Early Toarcian		183	182	facultatively mobile	suspension feeder	deep infaunal	4	1	4	14	62	7068
Pinna (Pinna) folium	Ostreida	Pinnidae	Pinna (Pinna)	2	Early Toarcian		183	182	stationary, attached	suspension feeder	semi-infaunal	2	1	2	16	62	7068
Pleuromya aequistriata	Pholadida	Pleuromyidae	Pleuromya	8	Early Toarcian		183	182	facultatively mobile	suspension feeder	deep infaunal	4	1	4	14	62	7068
Pleuromya uniformis	Pholadida	Pleuromyidae	Pleuromya	3	Early Toarcian		183	182	facultatively mobile	suspension feeder	deep infaunal	4	1	4	14	62	7068
Plicatula (Harpax) spinosa	Pectinida	Plicatulidae	Plicatula (Harpax)	12	Early Toarcian		183	182	stationary, attached, epibiont	suspension feeder	epifaunal	2	1	1	4	62	7068
Protocardia striatula	Cardiida	Cardiidae	Protocardia	1	Early Toarcian		183	182	facultatively mobile	suspension feeder	infaunal	4	1	3	3	62	7068
Pecten (Pecten) dentatus	Pectinida	Pectinidae	Pecten (Pecten)	2	Early Toarcian		183	182	facultatively mobile	suspension feeder	epifaunal	4	1	1	7	62	7068
Pseudopecten (Pseudopecten) equivalvis	Pectinida	Pectinidae	Pseudopecten (Pseudopecten)	2	Early Toarcian		183	182	facultatively mobile	suspension feeder	low-level epifaunal	4	1	1	7	62	7068
Cucullaea (Idonearca) muensteri	Arcida	Cucullaeidae	Cucullaea (Idonearca)	3	Early Toarcian		183	182	facultatively mobile	suspension feeder	infaunal	4	1	3	3	62	7068
Gryphaea (Bilobissa) sublobata	Ostreida	Gryphaeidae	Gryphaea (Bilobissa)	2	Early Toarcian		183	182	stationary, attached	suspension feeder	epifaunal	2	1	1	4	62	7068
Limea (Pseudolimea) roemeri	Pectinida	Limidae	Pseudolimea	2	Early Toarcian		183	182	stationary, attached	suspension feeder	low-level epifaunal	2	1	1	4	62	7068
Nicaniella (Nicaniella) voltzi	Carditida	Astartidae	Nicaniella (Nicaniella)	2	Early Toarcian		183	182	facultatively mobile	suspension feeder	infaunal	4	1	3	3	62	7068
Palaeoneilo galatea	Nuculanida	Malletiidae	Palaeoneilo	1	Early Toarcian		183	182	slow motile	deposit feeder, suspension feeder	infaunal	6	2	3	2	62	7068
Pleuromya aequistriata	Pholadida	Pleuromyidae	Pleuromya	5	Early Toarcian		183	182	facultatively mobile	suspension feeder	deep infaunal	4	1	4	14	62	7068
Plicatula (Harpax) spinosa	Pectinida	Plicatulidae	Plicatula (Harpax)	1	Early Toarcian		183	182	stationary, attached, epibiont	suspension feeder	epifaunal	2	1	1	4	62	7068
Pecten (Pecten) dentatus	Pectinida	Pectinidae	Pecten (Pecten)	2	Early Toarcian		183	182	facultatively mobile	suspension feeder	epifaunal	4	1	1	7	62	7068
Pseudopecten (Pseudopecten) equivalvis	Pectinida	Pectinidae	Pseudopecten (Pseudopecten)	1	Early Toarcian		183	182	facultatively mobile	suspension feeder	low-level epifaunal	4	1	1	7	62	7068
Chlamys textoria	Pectinida	Pectinidae	Chlamys	2	Early Toarcian		183	182	facultatively mobile, unattached	suspension feeder	epifaunal	4	1	1	7	62	7068
Isocyprina	Veneroidei	Arcticidae	Isocyprina	1	Early Toarcian		183	182	facultatively mobile	suspension feeder	infaunal	4	1	3	3	62	7068
Limea (Pseudolimea) roemeri	Pectinida	Limidae	Pseudolimea	1	Early Toarcian		183	182	stationary, attached	suspension feeder	low-level epifaunal	2	1	1	4	62	7068
Nicaniella (Nicaniella) voltzi	Carditida	Astartidae	Nicaniella (Nicaniella)	1	Early Toarcian		183	182	facultatively mobile	suspension feeder	infaunal	4	1	3	3	62	7068
Pholadomya (Pholadomya) ambigua	Pholadomyida	Pholadomyidae	Pholadomya (Pholadomya)	2	Early Toarcian		183	182	facultatively mobile	suspension feeder	deep infaunal	4	1	4	14	62	7068
Plagiostoma	Pectinida	Limidae	Plagiostoma	1	Early Toarcian		183	182	stationary, attached	suspension feeder	low-level epifaunal	2	1	1	4	62	7068
Pleuromya aequistriata	Pholadida	Pleuromyidae	Pleuromya	4	Early Toarcian		183	182	facultatively mobile	suspension feeder	deep infaunal	4	1	4	14	62	7068
Plicatula (Harpax) spinosa	Pectinida	Plicatulidae	Plicatula (Harpax)	15	Early Toarcian		183	182	stationary, attached, epibiont	suspension feeder	epifaunal	2	1	1	4	62	7068
Pseudopecten (Pseudopecten) equivalvis	Pectinida	Pectinidae	Pseudopecten (Pseudopecten)	2	Early Toarcian		183	182	facultatively mobile	suspension feeder	low-level epifaunal	4	1	1	7	62	7068
Pseudotrapezium	Veneroidei	Arcticidae	Pseudotrapezium	1	Early Toarcian		183	182	facultatively mobile	suspension feeder	infaunal	4	1	3	3	62	7068
Pleuromya aequistriata	Pholadida	Pleuromyidae	Pleuromya	2	Early Toarcian		183	182	facultatively mobile	suspension feeder	deep infaunal	4	1	4	14	62	7068
Plicatula (Harpax) spinosa	Pectinida	Plicatulidae	Plicatula (Harpax)	3	Early Toarcian		183	182	stationary, attached, epibiont	suspension feeder	epifaunal	2	1	1	4	62	7068
Pseudopecten (Pseudopecten) equivalvis	Pectinida	Pectinidae	Pseudopecten (Pseudopecten)	3	Early Toarcian		183	182	facultatively mobile	suspension feeder	low-level epifaunal	4	1	1	7	62	7068
Gryphaea (Gryphaea) dumortieri	Ostreida	Gryphaeidae	Gryphaea (Gryphaea)	2	Early Toarcian		183	182	stationary, attached	suspension feeder	epifaunal	2	1	1	4	62	7068
Palaeoneilo galatea	Nuculanida	Malletiidae	Palaeoneilo	1	Early Toarcian		183	182	slow motile	deposit feeder, suspension feeder	infaunal	6	2	3	2	62	7068
Protocardia	Cardiida	Cardiidae	Protocardia	1	Early Toarcian		183	182	facultatively mobile	suspension feeder	infaunal	4	1	3	3	62	7068
Nanogyra auricularis	Ostreida	Gryphaeidae	Nanogyra	6	Early Toarcian		183	182	stationary, attached	suspension feeder	epifaunal	2	1	1	4	62	7068
Parvamussium pumilum	Pectinida	Propeamussiidae	Parvamussium	5	Early Toarcian		183	182	facultatively mobile, unattached	carnivore	epifaunal	4	6	1	9	62	7068
Chlamys textoria	Pectinida	Pectinidae	Chlamys	1	Early Toarcian		183	182	facultatively mobile, unattached	suspension feeder	epifaunal	4	1	1	7	62	7068
Nanogyra auricularis	Ostreida	Gryphaeidae	Nanogyra	11	Early Toarcian		183	182	stationary, attached	suspension feeder	epifaunal	2	1	1	4	62	7068
Plicatula (Harpax) auricula	Pectinida	Plicatulidae	Plicatula (Harpax)	2	Early Toarcian		183	182	stationary, attached, epibiont	suspension feeder	epifaunal	2	1	1	4	62	7068
Mactromya cardioides	Lucinida	Mactromyidae	Mactromya	1	Early Toarcian		183	182	facultatively mobile	chemosymbiotic	deep infaunal	4	9	3	11	62	7068
Chlamys textoria	Pectinida	Pectinidae	Chlamys	1	Early Toarcian		183	182	facultatively mobile, unattached	suspension feeder	epifaunal	4	1	1	7	62	7068
Lima (Mantellum) duplicata	Pectinida	Limidae	Lima (Mantellum)	1	Early Toarcian		183	182	facultatively mobile	suspension feeder	epifaunal	2	1	1	4	62	7068
Nanogyra auricularis	Ostreida	Gryphaeidae	Nanogyra	3	Early Toarcian		183	182	stationary, attached	suspension feeder	epifaunal	2	1	1	4	62	7068
Ceratomya concentrica	Pholadida	Ceratomyidae	Ceratomya	1	Early Toarcian		183	182	facultatively mobile	suspension feeder	infaunal	4	1	3	3	62	7068
Plicatula (Harpax) spinosa	Pectinida	Plicatulidae	Plicatula (Harpax)	106	Early Toarcian		183	182	stationary, attached, epibiont	suspension feeder	epifaunal	2	1	1	4	62	7068
Pecten (Pecten) dentatus	Pectinida	Pectinidae	Pecten (Pecten)	1	Early Toarcian		183	182	facultatively mobile	suspension feeder	epifaunal	4	1	1	7	62	7068
Eopecten velatus	Pectinida	Pectinidae	Eopecten	1	Early Toarcian		183	182	stationary, attached	suspension feeder	low-level epifaunal	2	1	1	4	62	7068
Plicatula (Harpax) spinosa	Pectinida	Plicatulidae	Plicatula (Harpax)	83	Early Toarcian		183	182	stationary, attached, epibiont	suspension feeder	epifaunal	2	1	1	4	62	7068
Eopecten velatus	Pectinida	Pectinidae	Eopecten	2	Early Toarcian		183	182	stationary, attached	suspension feeder	low-level epifaunal	2	1	1	4	62	7068
Plicatula (Harpax) spinosa	Pectinida	Plicatulidae	Plicatula (Harpax)	23	Early Toarcian		183	182	stationary, attached, epibiont	suspension feeder	epifaunal	2	1	1	4	62	7068
Eopecten velatus	Pectinida	Pectinidae	Eopecten	2	Early Toarcian		183	182	stationary, attached	suspension feeder	low-level epifaunal	2	1	1	4	62	7068
Nicaniella (Nicaniella) voltzi	Carditida	Astartidae	Nicaniella (Nicaniella)	1	Early Toarcian		183	182	facultatively mobile	suspension feeder	infaunal	4	1	3	3	62	7068
Plicatula (Harpax) spinosa	Pectinida	Plicatulidae	Plicatula (Harpax)	1	Early Toarcian		183	182	stationary, attached, epibiont	suspension feeder	epifaunal	2	1	1	4	62	7068
Plicatula (Harpax) spinosa	Pectinida	Plicatulidae	Plicatula (Harpax)	14	Early Toarcian		183	182	stationary, attached, epibiont	suspension feeder	epifaunal	2	1	1	4	62	7068
Limea (Pseudolimea) roemeri	Pectinida	Limidae	Pseudolimea	2	Early Toarcian		183	182	stationary, attached	suspension feeder	low-level epifaunal	2	1	1	4	62	7068
Plicatula (Harpax) spinosa	Pectinida	Plicatulidae	Plicatula (Harpax)	19	Early Toarcian		183	182	stationary, attached, epibiont	suspension feeder	epifaunal	2	1	1	4	62	7068
Limea (Pseudolimea) roemeri	Pectinida	Limidae	Pseudolimea	1	Early Toarcian		183	182	stationary, attached	suspension feeder	low-level epifaunal	2	1	1	4	62	7068
Palaeoneilo galatea	Nuculanida	Malletiidae	Palaeoneilo	1	Early Toarcian		183	182	slow motile	deposit feeder, suspension feeder	infaunal	6	2	3	2	62	7068
Plicatula (Harpax) spinosa	Pectinida	Plicatulidae	Plicatula (Harpax)	26	Early Toarcian		183	182	stationary, attached, epibiont	suspension feeder	epifaunal	2	1	1	4	62	7068
Plicatula (Harpax) spinosa	Pectinida	Plicatulidae	Plicatula (Harpax)	21	Early Toarcian		183	182	stationary, attached, epibiont	suspension feeder	epifaunal	2	1	1	4	62	7068
Plicatula (Harpax) spinosa	Pectinida	Plicatulidae	Plicatula (Harpax)	25	Early Toarcian		183	182	stationary, attached, epibiont	suspension feeder	epifaunal	2	1	1	4	62	7068
Limea (Pseudolimea) roemeri	Pectinida	Limidae	Pseudolimea	9	Early Toarcian		183	182	stationary, attached	suspension feeder	low-level epifaunal	2	1	1	4	62	7068
Plicatula (Harpax) spinosa	Pectinida	Plicatulidae	Plicatula (Harpax)	111	Early Toarcian		183	182	stationary, attached, epibiont	suspension feeder	epifaunal	2	1	1	4	62	7068
Bositra buchi	Ostreida	Posidoniidae	Bositra	1	Early Toarcian		183	182	stationary, unattached	suspension feeder	epifaunal	1	1	1	12	62	7068
Eopecten velatus	Pectinida	Pectinidae	Eopecten	1	Early Toarcian		183	182	stationary, attached	suspension feeder	low-level epifaunal	2	1	1	4	62	7068
Limea (Pseudolimea) roemeri	Pectinida	Limidae	Pseudolimea	3	Early Toarcian		183	182	stationary, attached	suspension feeder	low-level epifaunal	2	1	1	4	62	7068
Nuculana	Nuculanida	Nuculanidae	Nuculana	1	Early Toarcian		183	182	slow motile	deposit feeder, suspension feeder	infaunal	6	2	3	2	62	7068
Pleuromya aequistriata	Pholadida	Pleuromyidae	Pleuromya	1	Early Toarcian		183	182	facultatively mobile	suspension feeder	deep infaunal	4	1	4	14	62	7068
Grammatodon concinnus	Arcida	Parallelodontidae	Grammatodon	1	Early Toarcian		183	182	stationary, attached	suspension feeder	epifaunal	2	1	1	4	62	7068
Plicatula (Harpax) spinosa	Pectinida	Plicatulidae	Plicatula (Harpax)	3	Early Toarcian		183	182	stationary, attached, epibiont	suspension feeder	epifaunal	2	1	1	4	62	7068
Bositra buchi	Ostreida	Posidoniidae	Bositra	1	Early Toarcian		183	182	stationary, unattached	suspension feeder	epifaunal	1	1	1	12	62	7068
Nuculana	Nuculanida	Nuculanidae	Nuculana	1	Early Toarcian		183	182	slow motile	deposit feeder, suspension feeder	infaunal	6	2	3	2	62	7068
Palaeoneilo galatea	Nuculanida	Malletiidae	Palaeoneilo	2	Early Toarcian		183	182	slow motile	deposit feeder, suspension feeder	infaunal	6	2	3	2	62	7068
Plicatula (Harpax) spinosa	Pectinida	Plicatulidae	Plicatula (Harpax)	1	Early Toarcian		183	182	stationary, attached, epibiont	suspension feeder	epifaunal	2	1	1	4	62	7068
Atreta	Pectinida	Dimyidae	Atreta	10	Early Toarcian		183	182	cemented	suspension feeder	epifaunal	3	1	1	1	62	7068
Nuculana	Nuculanida	Nuculanidae	Nuculana	2	Early Toarcian		183	182	slow motile	deposit feeder, suspension feeder	infaunal	6	2	3	2	62	7068
Plicatula (Harpax) auricula	Pectinida	Plicatulidae	Plicatula (Harpax)	1	Early Toarcian		183	182	stationary, attached, epibiont	suspension feeder	epifaunal	2	1	1	4	62	7068
Grammatodon concinnus	Arcida	Parallelodontidae	Grammatodon	1	Early Toarcian		183	182	stationary, attached	suspension feeder	epifaunal	2	1	1	4	62	7068
Nanogyra auricularis	Ostreida	Gryphaeidae	Nanogyra	8	Early Toarcian		183	182	stationary, attached	suspension feeder	epifaunal	2	1	1	4	62	7068
Palaeoneilo galatea	Nuculanida	Malletiidae	Palaeoneilo	2	Early Toarcian		183	182	slow motile	deposit feeder, suspension feeder	infaunal	6	2	3	2	62	7068
Parallelodon hirsonensis	Arcida	Parallelodontidae	Parallelodon	1	Early Toarcian		183	182	stationary, attached	suspension feeder	epifaunal	2	1	1	4	62	7068
Parvamussium pumilum	Pectinida	Propeamussiidae	Parvamussium	1	Early Toarcian		183	182	facultatively mobile, unattached	carnivore	epifaunal	4	6	1	9	62	7068
Plicatula (Harpax) auricula	Pectinida	Plicatulidae	Plicatula (Harpax)	2	Early Toarcian		183	182	stationary, attached, epibiont	suspension feeder	epifaunal	2	1	1	4	62	7068
Bositra buchi	Ostreida	Posidoniidae	Bositra	45	Middle Toarcian		182	175.6	stationary, unattached	suspension feeder	epifaunal	1	1	1	12	62	7068
Camptonectes subulatus	Pectinida	Pectinidae	Camptonectes	4	Middle Toarcian		182	175.6	stationary, attached	suspension feeder	low-level epifaunal	2	1	1	4	62	7068
Palaeoneilo galatea	Nuculanida	Malletiidae	Palaeoneilo	1	Middle Toarcian		182	175.6	slow motile	deposit feeder, suspension feeder	infaunal	6	2	3	2	62	7068
Gryphaea (Catinula) crickleyensis	Ostreida	Gryphaeidae	Gryphaea (Catinula)	4	Early Toarcian		183	182	stationary, attached	suspension feeder	epifaunal	2	1	1	4	62	7068
Corbulomima obscura	Pholadida	Corbulidae	Corbulomima	1	Early Toarcian		183	182	facultatively mobile, attached	suspension feeder	infaunal	5	1	3	5	62	7068
Cucullaea (Idonearca) muensteri	Arcida	Cucullaeidae	Cucullaea (Idonearca)	1	Early Toarcian		183	182	facultatively mobile	suspension feeder	infaunal	4	1	3	3	62	7068
Grammatodon concinnus	Arcida	Parallelodontidae	Grammatodon	2	Early Toarcian		183	182	stationary, attached	suspension feeder	epifaunal	2	1	1	4	62	7068
Gryphaea (Bilobissa) sublobata	Ostreida	Gryphaeidae	Gryphaea (Bilobissa)	45	Early Toarcian		183	182	stationary, attached	suspension feeder	epifaunal	2	1	1	4	62	7068
Inoperna sowerbiana	Mytilida	Mytilidae	Inoperna	4	Early Toarcian		183	182	stationary, attached	suspension feeder	epifaunal	2	1	1	4	62	7068
Nicaniella (Nicaniella)	Carditida	Astartidae	Nicaniella (Nicaniella)	5	Early Toarcian		183	182	facultatively mobile	suspension feeder	infaunal	4	1	3	3	62	7068
Parallelodon hirsonensis	Arcida	Parallelodontidae	Parallelodon	3	Early Toarcian		183	182	stationary, attached	suspension feeder	epifaunal	2	1	1	4	62	7068
Pinna (Pinna) folium	Ostreida	Pinnidae	Pinna (Pinna)	2	Early Toarcian		183	182	stationary, attached	suspension feeder	semi-infaunal	2	1	2	16	62	7068
Plagiostoma punctatum	Pectinida	Limidae	Plagiostoma	1	Early Toarcian		183	182	stationary, attached	suspension feeder	low-level epifaunal	2	1	1	4	62	7068
Plicatula (Harpax) spinosa	Pectinida	Plicatulidae	Plicatula (Harpax)	35	Early Toarcian		183	182	stationary, attached, epibiont	suspension feeder	epifaunal	2	1	1	4	62	7068
Pronoella	Veneroidei	Arcticidae	Pronoella	3	Early Toarcian		183	182	facultatively mobile	suspension feeder	infaunal	4	1	3	3	62	7068
Protocardia striatula	Cardiida	Cardiidae	Protocardia	2	Early Toarcian		183	182	facultatively mobile	suspension feeder	infaunal	4	1	3	3	62	7068
Pecten (Pecten) dentatus	Pectinida	Pectinidae	Pecten (Pecten)	2	Early Toarcian		183	182	facultatively mobile	suspension feeder	epifaunal	4	1	1	7	62	7068
Grammatodon concinnus	Arcida	Parallelodontidae	Grammatodon	1	Early Toarcian		183	182	stationary, attached	suspension feeder	epifaunal	2	1	1	4	62	7068
Gryphaea (Bilobissa) sublobata	Ostreida	Gryphaeidae	Gryphaea (Bilobissa)	9	Early Toarcian		183	182	stationary, attached	suspension feeder	epifaunal	2	1	1	4	62	7068
Limea (Pseudolimea) cristata	Pectinida	Limidae	Pseudolimea	2	Early Toarcian		183	182	stationary, attached	suspension feeder	low-level epifaunal	2	1	1	4	62	7068
Nanogyra monoptera	Ostreida	Gryphaeidae	Nanogyra	25	Early Toarcian		183	182	stationary, attached	suspension feeder	epifaunal	2	1	1	4	62	7068
Plicatula (Harpax) spinosa	Pectinida	Plicatulidae	Plicatula (Harpax)	28	Early Toarcian		183	182	stationary, attached, epibiont	suspension feeder	epifaunal	2	1	1	4	62	7068
Pecten (Pecten) dentatus	Pectinida	Pectinidae	Pecten (Pecten)	2	Early Toarcian		183	182	facultatively mobile	suspension feeder	epifaunal	4	1	1	7	62	7068
Pseudopecten (Pseudopecten) equivalvis	Pectinida	Pectinidae	Pseudopecten (Pseudopecten)	1	Early Toarcian		183	182	facultatively mobile	suspension feeder	low-level epifaunal	4	1	1	7	62	7068
Gryphaea (Bilobissa) sublobata	Ostreida	Gryphaeidae	Gryphaea (Bilobissa)	3	Early Toarcian		183	182	stationary, attached	suspension feeder	epifaunal	2	1	1	4	62	7068
Lima (Mantellum) duplicata	Pectinida	Limidae	Lima (Mantellum)	1	Early Toarcian		183	182	facultatively mobile	suspension feeder	epifaunal	2	1	1	4	62	7068
Plagiostoma punctatum	Pectinida	Limidae	Plagiostoma	1	Early Toarcian		183	182	stationary, attached	suspension feeder	low-level epifaunal	2	1	1	4	62	7068
Plicatula (Harpax) spinosa	Pectinida	Plicatulidae	Plicatula (Harpax)	29	Early Toarcian		183	182	stationary, attached, epibiont	suspension feeder	epifaunal	2	1	1	4	62	7068
Pronoella	Veneroidei	Arcticidae	Pronoella	1	Early Toarcian		183	182	facultatively mobile	suspension feeder	infaunal	4	1	3	3	62	7068
Pronoella	Veneroidei	Arcticidae	Pronoella	1	Early Toarcian		183	182	facultatively mobile	suspension feeder	infaunal	4	1	3	3	62	7068
Pecten (Pecten) dentatus	Pectinida	Pectinidae	Pecten (Pecten)	3	Early Toarcian		183	182	facultatively mobile	suspension feeder	epifaunal	4	1	1	7	62	7068
Gryphaea (Bilobissa) sublobata	Ostreida	Gryphaeidae	Gryphaea (Bilobissa)	4	Early Toarcian		183	182	stationary, attached	suspension feeder	epifaunal	2	1	1	4	62	7068
Limea (Pseudolimea) cristata	Pectinida	Limidae	Pseudolimea	1	Early Toarcian		183	182	stationary, attached	suspension feeder	low-level epifaunal	2	1	1	4	62	7068
Nanogyra monoptera	Ostreida	Gryphaeidae	Nanogyra	4	Early Toarcian		183	182	stationary, attached	suspension feeder	epifaunal	2	1	1	4	62	7068
Plicatula (Harpax) spinosa	Pectinida	Plicatulidae	Plicatula (Harpax)	42	Early Toarcian		183	182	stationary, attached, epibiont	suspension feeder	epifaunal	2	1	1	4	62	7068
Pecten (Pecten) dentatus	Pectinida	Pectinidae	Pecten (Pecten)	3	Early Toarcian		183	182	facultatively mobile	suspension feeder	epifaunal	4	1	1	7	62	7068
Arcomytilus asper	Mytilida	Mytilidae	Arcomytilus	3	Early Toarcian		183	182	stationary, attached	suspension feeder	epifaunal	2	1	1	4	62	7068
Camptonectes (Camptonectes) auritus	Pectinida	Pectinidae	Camptonectes (Camptonectes)	1	Early Toarcian		183	182	stationary, attached	suspension feeder	low-level epifaunal	2	1	1	4	62	7068
Gryphaea (Catinula) crickleyensis	Ostreida	Gryphaeidae	Gryphaea (Catinula)	7	Early Toarcian		183	182	stationary, attached	suspension feeder	epifaunal	2	1	1	4	62	7068
Costigervillia	Ostreida	Bakevelliidae	Costigervillia	1	Early Toarcian		183	182	stationary, attached, epibiont	suspension feeder	epifaunal	2	1	1	4	62	7068
Cucullaea (Idonearca) muensteri	Arcida	Cucullaeidae	Cucullaea (Idonearca)	2	Early Toarcian		183	182	facultatively mobile	suspension feeder	infaunal	4	1	3	3	62	7068
Grammatodon concinnus	Arcida	Parallelodontidae	Grammatodon	3	Early Toarcian		183	182	stationary, attached	suspension feeder	epifaunal	2	1	1	4	62	7068
Gryphaea (Bilobissa) sublobata	Ostreida	Gryphaeidae	Gryphaea (Bilobissa)	22	Early Toarcian		183	182	stationary, attached	suspension feeder	epifaunal	2	1	1	4	62	7068
Limea (Pseudolimea) cristata	Pectinida	Limidae	Pseudolimea	1	Early Toarcian		183	182	stationary, attached	suspension feeder	low-level epifaunal	2	1	1	4	62	7068
Lima (Mantellum) duplicata	Pectinida	Limidae	Lima (Mantellum)	1	Early Toarcian		183	182	facultatively mobile	suspension feeder	epifaunal	2	1	1	4	62	7068
Modiolus gerthi	Mytilida	Mytilidae	Modiolus	1	Early Toarcian		183	182	stationary, attached, epibiont	suspension feeder	semi-infaunal	2	1	2	16	62	7068
Modiolus	Mytilida	Mytilidae	Modiolus	4	Early Toarcian		183	182	stationary, attached, epibiont	suspension feeder	semi-infaunal	2	1	2	16	62	7068
Nanogyra monoptera	Ostreida	Gryphaeidae	Nanogyra	5	Early Toarcian		183	182	stationary, attached	suspension feeder	epifaunal	2	1	1	4	62	7068
Nicaniella (Nicaniella) voltzi	Carditida	Astartidae	Nicaniella (Nicaniella)	1	Early Toarcian		183	182	facultatively mobile	suspension feeder	infaunal	4	1	3	3	62	7068
Pachymya	Pholadomyida	Pholadomyidae	Pachymya	6	Early Toarcian		183	182	facultatively mobile	suspension feeder	deep infaunal	4	1	4	14	62	7068
Parallelodon hirsonensis	Arcida	Parallelodontidae	Parallelodon	1	Early Toarcian		183	182	stationary, attached	suspension feeder	epifaunal	2	1	1	4	62	7068
Pinna (Pinna) folium	Ostreida	Pinnidae	Pinna (Pinna)	2	Early Toarcian		183	182	stationary, attached	suspension feeder	semi-infaunal	2	1	2	16	62	7068
Plagiostoma punctatum	Pectinida	Limidae	Plagiostoma	1	Early Toarcian		183	182	stationary, attached	suspension feeder	low-level epifaunal	2	1	1	4	62	7068
Plicatula (Harpax) spinosa	Pectinida	Plicatulidae	Plicatula (Harpax)	32	Early Toarcian		183	182	stationary, attached, epibiont	suspension feeder	epifaunal	2	1	1	4	62	7068
Pronoella	Veneroidei	Arcticidae	Pronoella	5	Early Toarcian		183	182	facultatively mobile	suspension feeder	infaunal	4	1	3	3	62	7068
Pronoella	Veneroidei	Arcticidae	Pronoella	1	Early Toarcian		183	182	facultatively mobile	suspension feeder	infaunal	4	1	3	3	62	7068
Pecten (Pecten) dentatus	Pectinida	Pectinidae	Pecten (Pecten)	5	Early Toarcian		183	182	facultatively mobile	suspension feeder	epifaunal	4	1	1	7	62	7068
Pseudopecten (Pseudopecten) equivalvis	Pectinida	Pectinidae	Pseudopecten (Pseudopecten)	1	Early Toarcian		183	182	facultatively mobile	suspension feeder	low-level epifaunal	4	1	1	7	62	7068
Mactromya cardioides	Lucinida	Mactromyidae	Mactromya	1	Early Toarcian		183	182	facultatively mobile	chemosymbiotic	deep infaunal	4	9	3	11	62	7068
Gryphaea (Bilobissa) sublobata	Ostreida	Gryphaeidae	Gryphaea (Bilobissa)	1	Early Toarcian		183	182	stationary, attached	suspension feeder	epifaunal	2	1	1	4	62	7068
Limea (Pseudolimea) cristata	Pectinida	Limidae	Pseudolimea	1	Early Toarcian		183	182	stationary, attached	suspension feeder	low-level epifaunal	2	1	1	4	62	7068
Plicatula (Harpax) spinosa	Pectinida	Plicatulidae	Plicatula (Harpax)	105	Early Toarcian		183	182	stationary, attached, epibiont	suspension feeder	epifaunal	2	1	1	4	62	7068
Pecten (Pecten) dentatus	Pectinida	Pectinidae	Pecten (Pecten)	1	Early Toarcian		183	182	facultatively mobile	suspension feeder	epifaunal	4	1	1	7	62	7068
Arcomytilus asper	Mytilida	Mytilidae	Arcomytilus	1	Early Toarcian		183	182	stationary, attached	suspension feeder	epifaunal	2	1	1	4	62	7068
Grammatodon concinnus	Arcida	Parallelodontidae	Grammatodon	1	Early Toarcian		183	182	stationary, attached	suspension feeder	epifaunal	2	1	1	4	62	7068
Gryphaea (Bilobissa) sublobata	Ostreida	Gryphaeidae	Gryphaea (Bilobissa)	5	Early Toarcian		183	182	stationary, attached	suspension feeder	epifaunal	2	1	1	4	62	7068
Lithophaga (Lithophaga)	Mytilida	Mytilidae	Lithophaga (Lithophaga)	1	Early Toarcian		183	182	stationary, attached	suspension feeder	boring	2	1	2	16	62	7068
Lycettia lunularis	Mytilida	Mytilidae	Lycettia	1	Early Toarcian		183	182	stationary, attached	suspension feeder	epifaunal	2	1	1	4	62	7068
Pachymya	Pholadomyida	Pholadomyidae	Pachymya	2	Early Toarcian		183	182	facultatively mobile	suspension feeder	deep infaunal	4	1	4	14	62	7068
Parallelodon hirsonensis	Arcida	Parallelodontidae	Parallelodon	2	Early Toarcian		183	182	stationary, attached	suspension feeder	epifaunal	2	1	1	4	62	7068
Pinna	Ostreida	Pinnidae	Pinna	1	Early Toarcian		183	182	stationary, attached	suspension feeder	semi-infaunal	2	1	2	16	62	7068
Plicatula (Harpax) spinosa	Pectinida	Plicatulidae	Plicatula (Harpax)	128	Early Toarcian		183	182	stationary, attached, epibiont	suspension feeder	epifaunal	2	1	1	4	62	7068
Pronoella	Veneroidei	Arcticidae	Pronoella	1	Early Toarcian		183	182	facultatively mobile	suspension feeder	infaunal	4	1	3	3	62	7068
Protocardia striatula	Cardiida	Cardiidae	Protocardia	2	Early Toarcian		183	182	facultatively mobile	suspension feeder	infaunal	4	1	3	3	62	7068
Gryphaea (Catinula) crickleyensis	Ostreida	Gryphaeidae	Gryphaea (Catinula)	1	Early Toarcian		183	182	stationary, attached	suspension feeder	epifaunal	2	1	1	4	62	7068
Gryphaea (Bilobissa) sublobata	Ostreida	Gryphaeidae	Gryphaea (Bilobissa)	3	Early Toarcian		183	182	stationary, attached	suspension feeder	epifaunal	2	1	1	4	62	7068
Limea (Pseudolimea) cristata	Pectinida	Limidae	Pseudolimea	1	Early Toarcian		183	182	stationary, attached	suspension feeder	low-level epifaunal	2	1	1	4	62	7068
Nanogyra monoptera	Ostreida	Gryphaeidae	Nanogyra	1	Early Toarcian		183	182	stationary, attached	suspension feeder	epifaunal	2	1	1	4	62	7068
Plicatula (Harpax) spinosa	Pectinida	Plicatulidae	Plicatula (Harpax)	94	Early Toarcian		183	182	stationary, attached, epibiont	suspension feeder	epifaunal	2	1	1	4	62	7068
Pecten (Pecten) dentatus	Pectinida	Pectinidae	Pecten (Pecten)	1	Early Toarcian		183	182	facultatively mobile	suspension feeder	epifaunal	4	1	1	7	62	7068
Pseudopecten (Pseudopecten) equivalvis	Pectinida	Pectinidae	Pseudopecten (Pseudopecten)	1	Early Toarcian		183	182	facultatively mobile	suspension feeder	low-level epifaunal	4	1	1	7	62	7068
Gryphaea (Bilobissa) sublobata	Ostreida	Gryphaeidae	Gryphaea (Bilobissa)	12	Early Toarcian		183	182	stationary, attached	suspension feeder	epifaunal	2	1	1	4	62	7068
Inoperna sowerbiana	Mytilida	Mytilidae	Inoperna	1	Early Toarcian		183	182	stationary, attached	suspension feeder	epifaunal	2	1	1	4	62	7068
Lycettia lunularis	Mytilida	Mytilidae	Lycettia	1	Early Toarcian		183	182	stationary, attached	suspension feeder	epifaunal	2	1	1	4	62	7068
Nicaniella (Nicaniella)	Carditida	Astartidae	Nicaniella (Nicaniella)	1	Early Toarcian		183	182	facultatively mobile	suspension feeder	infaunal	4	1	3	3	62	7068
Plicatula (Harpax) spinosa	Pectinida	Plicatulidae	Plicatula (Harpax)	39	Early Toarcian		183	182	stationary, attached, epibiont	suspension feeder	epifaunal	2	1	1	4	62	7068
Coelopis (Coelopis) parvocardinata	Carditida	Astartidae	Coelopis (Coelopis)	1	Early Toarcian		183	182	slow motile	suspension feeder	infaunal	6	1	3	17	62	7068
Gryphaea (Bilobissa) sublobata	Ostreida	Gryphaeidae	Gryphaea (Bilobissa)	5	Early Toarcian		183	182	stationary, attached	suspension feeder	epifaunal	2	1	1	4	62	7068
Pleuromya aequistriata	Pholadida	Pleuromyidae	Pleuromya	2	Early Toarcian		183	182	facultatively mobile	suspension feeder	deep infaunal	4	1	4	14	62	7068
Plicatula (Harpax) spinosa	Pectinida	Plicatulidae	Plicatula (Harpax)	66	Early Toarcian		183	182	stationary, attached, epibiont	suspension feeder	epifaunal	2	1	1	4	62	7068
Pecten (Pecten) dentatus	Pectinida	Pectinidae	Pecten (Pecten)	5	Early Toarcian		183	182	facultatively mobile	suspension feeder	epifaunal	4	1	1	7	62	7068
Pseudopecten (Pseudopecten) equivalvis	Pectinida	Pectinidae	Pseudopecten (Pseudopecten)	1	Early Toarcian		183	182	facultatively mobile	suspension feeder	low-level epifaunal	4	1	1	7	62	7068
Coelopis (Coelopis) parvocardinata	Carditida	Astartidae	Coelopis (Coelopis)	1	Early Toarcian		183	182	slow motile	suspension feeder	infaunal	6	1	3	17	62	7068
Eopecten velatus	Pectinida	Pectinidae	Eopecten	1	Early Toarcian		183	182	stationary, attached	suspension feeder	low-level epifaunal	2	1	1	4	62	7068
Gryphaea (Bilobissa) sublobata	Ostreida	Gryphaeidae	Gryphaea (Bilobissa)	11	Early Toarcian		183	182	stationary, attached	suspension feeder	epifaunal	2	1	1	4	62	7068
Lima (Mantellum) duplicata	Pectinida	Limidae	Lima (Mantellum)	1	Early Toarcian		183	182	facultatively mobile	suspension feeder	epifaunal	2	1	1	4	62	7068
Nicaniella (Nicaniella) voltzi	Carditida	Astartidae	Nicaniella (Nicaniella)	1	Early Toarcian		183	182	facultatively mobile	suspension feeder	infaunal	4	1	3	3	62	7068
Pachymya	Pholadomyida	Pholadomyidae	Pachymya	1	Early Toarcian		183	182	facultatively mobile	suspension feeder	deep infaunal	4	1	4	14	62	7068
Pinna	Ostreida	Pinnidae	Pinna	3	Early Toarcian		183	182	stationary, attached	suspension feeder	semi-infaunal	2	1	2	16	62	7068
Plagiostoma punctatum	Pectinida	Limidae	Plagiostoma	1	Early Toarcian		183	182	stationary, attached	suspension feeder	low-level epifaunal	2	1	1	4	62	7068
Plicatula (Harpax) spinosa	Pectinida	Plicatulidae	Plicatula (Harpax)	74	Early Toarcian		183	182	stationary, attached, epibiont	suspension feeder	epifaunal	2	1	1	4	62	7068
Pecten (Pecten) dentatus	Pectinida	Pectinidae	Pecten (Pecten)	2	Early Toarcian		183	182	facultatively mobile	suspension feeder	epifaunal	4	1	1	7	62	7068
Coelopis (Coelopis)	Carditida	Astartidae	Coelopis (Coelopis)	1	Early Toarcian		183	182	slow motile	suspension feeder	infaunal	6	1	3	17	62	7068
Gryphaea (Bilobissa) sublobata	Ostreida	Gryphaeidae	Gryphaea (Bilobissa)	24	Early Toarcian		183	182	stationary, attached	suspension feeder	epifaunal	2	1	1	4	62	7068
Lithophaga (Lithophaga)	Mytilida	Mytilidae	Lithophaga (Lithophaga)	1	Early Toarcian		183	182	stationary, attached	suspension feeder	boring	2	1	2	16	62	7068
Nicaniella (Nicaniella) voltzi	Carditida	Astartidae	Nicaniella (Nicaniella)	1	Early Toarcian		183	182	facultatively mobile	suspension feeder	infaunal	4	1	3	3	62	7068
Pinna	Ostreida	Pinnidae	Pinna	1	Early Toarcian		183	182	stationary, attached	suspension feeder	semi-infaunal	2	1	2	16	62	7068
Plagiostoma punctatum	Pectinida	Limidae	Plagiostoma	1	Early Toarcian		183	182	stationary, attached	suspension feeder	low-level epifaunal	2	1	1	4	62	7068
Plicatula (Harpax) spinosa	Pectinida	Plicatulidae	Plicatula (Harpax)	58	Early Toarcian		183	182	stationary, attached, epibiont	suspension feeder	epifaunal	2	1	1	4	62	7068
Pecten (Pecten) dentatus	Pectinida	Pectinidae	Pecten (Pecten)	1	Early Toarcian		183	182	facultatively mobile	suspension feeder	epifaunal	4	1	1	7	62	7068
Pseudopecten (Pseudopecten) equivalvis	Pectinida	Pectinidae	Pseudopecten (Pseudopecten)	1	Early Toarcian		183	182	facultatively mobile	suspension feeder	low-level epifaunal	4	1	1	7	62	7068
Pterocardia	Cardiida	Pterocardiidae	Pterocardia	1	Early Toarcian		183	182	facultatively mobile	suspension feeder	infaunal	4	1	3	3	62	7068
Mactromya cardioides	Lucinida	Mactromyidae	Mactromya	1	Early Toarcian		183	182	facultatively mobile	chemosymbiotic	deep infaunal	4	9	3	11	62	7068
Corbulomima obscura	Pholadida	Corbulidae	Corbulomima	1	Early Toarcian		183	182	facultatively mobile, attached	suspension feeder	infaunal	5	1	3	5	62	7068
Cucullaea (Idonearca) muensteri	Arcida	Cucullaeidae	Cucullaea (Idonearca)	2	Early Toarcian		183	182	facultatively mobile	suspension feeder	infaunal	4	1	3	3	62	7068
Entolium	Pectinida	Entoliidae	Entolium	1	Early Toarcian		183	182	facultatively mobile, unattached	suspension feeder	epifaunal	4	1	1	7	62	7068
Eopecten velatus	Pectinida	Pectinidae	Eopecten	1	Early Toarcian		183	182	stationary, attached	suspension feeder	low-level epifaunal	2	1	1	4	62	7068
Grammatodon concinnus	Arcida	Parallelodontidae	Grammatodon	5	Early Toarcian		183	182	stationary, attached	suspension feeder	epifaunal	2	1	1	4	62	7068
Gryphaea (Bilobissa) sublobata	Ostreida	Gryphaeidae	Gryphaea (Bilobissa)	32	Early Toarcian		183	182	stationary, attached	suspension feeder	epifaunal	2	1	1	4	62	7068
Lima (Mantellum) duplicata	Pectinida	Limidae	Lima (Mantellum)	1	Early Toarcian		183	182	facultatively mobile	suspension feeder	epifaunal	2	1	1	4	62	7068
Lycettia lunularis	Mytilida	Mytilidae	Lycettia	2	Early Toarcian		183	182	stationary, attached	suspension feeder	epifaunal	2	1	1	4	62	7068
Nuculana	Nuculanida	Nuculanidae	Nuculana	1	Early Toarcian		183	182	slow motile	deposit feeder, suspension feeder	infaunal	6	2	3	2	62	7068
Pachymya	Pholadomyida	Pholadomyidae	Pachymya	7	Early Toarcian		183	182	facultatively mobile	suspension feeder	deep infaunal	4	1	4	14	62	7068
Pinna (Pinna) folium	Ostreida	Pinnidae	Pinna (Pinna)	1	Early Toarcian		183	182	stationary, attached	suspension feeder	semi-infaunal	2	1	2	16	62	7068
Plagiostoma punctatum	Pectinida	Limidae	Plagiostoma	2	Early Toarcian		183	182	stationary, attached	suspension feeder	low-level epifaunal	2	1	1	4	62	7068
Plicatula (Harpax) spinosa	Pectinida	Plicatulidae	Plicatula (Harpax)	14	Early Toarcian		183	182	stationary, attached, epibiont	suspension feeder	epifaunal	2	1	1	4	62	7068
Pecten (Pecten) dentatus	Pectinida	Pectinidae	Pecten (Pecten)	10	Early Toarcian		183	182	facultatively mobile	suspension feeder	epifaunal	4	1	1	7	62	7068
Grammatodon concinnus	Arcida	Parallelodontidae	Grammatodon	1	Early Toarcian		183	182	stationary, attached	suspension feeder	epifaunal	2	1	1	4	62	7068
Gryphaea (Bilobissa) sublobata	Ostreida	Gryphaeidae	Gryphaea (Bilobissa)	6	Early Toarcian		183	182	stationary, attached	suspension feeder	epifaunal	2	1	1	4	62	7068
Gryphaea (Catinula) crickleyensis	Ostreida	Gryphaeidae	Gryphaea (Catinula)	6	Early Toarcian		183	182	stationary, attached	suspension feeder	epifaunal	2	1	1	4	62	7068
Ceratomya concentrica	Pholadida	Ceratomyidae	Ceratomya	1	Early Toarcian		183	182	facultatively mobile	suspension feeder	infaunal	4	1	3	3	62	7068
Corbulomima obscura	Pholadida	Corbulidae	Corbulomima	1	Early Toarcian		183	182	facultatively mobile, attached	suspension feeder	infaunal	5	1	3	5	62	7068
Entolium	Pectinida	Entoliidae	Entolium	1	Early Toarcian		183	182	facultatively mobile, unattached	suspension feeder	epifaunal	4	1	1	7	62	7068
Grammatodon concinnus	Arcida	Parallelodontidae	Grammatodon	1	Early Toarcian		183	182	stationary, attached	suspension feeder	epifaunal	2	1	1	4	62	7068
Gryphaea (Gryphaea) dumortieri	Ostreida	Gryphaeidae	Gryphaea (Gryphaea)	31	Early Toarcian		183	182	stationary, attached	suspension feeder	epifaunal	2	1	1	4	62	7068
Nicaniella (Nicaniella)	Carditida	Astartidae	Nicaniella (Nicaniella)	1	Early Toarcian		183	182	facultatively mobile	suspension feeder	infaunal	4	1	3	3	62	7068
Parallelodon hirsonensis	Arcida	Parallelodontidae	Parallelodon	1	Early Toarcian		183	182	stationary, attached	suspension feeder	epifaunal	2	1	1	4	62	7068
Plagiostoma punctatum	Pectinida	Limidae	Plagiostoma	1	Early Toarcian		183	182	stationary, attached	suspension feeder	low-level epifaunal	2	1	1	4	62	7068
Plagiostoma	Pectinida	Limidae	Plagiostoma	1	Early Toarcian		183	182	stationary, attached	suspension feeder	low-level epifaunal	2	1	1	4	62	7068
Plicatula (Harpax) auricula	Pectinida	Plicatulidae	Plicatula (Harpax)	1	Early Toarcian		183	182	stationary, attached, epibiont	suspension feeder	epifaunal	2	1	1	4	62	7068
Plicatula (Harpax) spinosa	Pectinida	Plicatulidae	Plicatula (Harpax)	13	Early Toarcian		183	182	stationary, attached, epibiont	suspension feeder	epifaunal	2	1	1	4	62	7068
Protocardia striatula	Cardiida	Cardiidae	Protocardia	3	Early Toarcian		183	182	facultatively mobile	suspension feeder	infaunal	4	1	3	3	62	7068
Pecten (Pecten) dentatus	Pectinida	Pectinidae	Pecten (Pecten)	1	Early Toarcian		183	182	facultatively mobile	suspension feeder	epifaunal	4	1	1	7	62	7068
Camptonectes (Camptonectes) auritus	Pectinida	Pectinidae	Camptonectes (Camptonectes)	3	Early Toarcian		183	182	stationary, attached	suspension feeder	low-level epifaunal	2	1	1	4	62	7068
Coelopis (Coelopis) parvocardinata	Carditida	Astartidae	Coelopis (Coelopis)	4	Early Toarcian		183	182	slow motile	suspension feeder	infaunal	6	1	3	17	62	7068
Corbulomima obscura	Pholadida	Corbulidae	Corbulomima	56	Early Toarcian		183	182	facultatively mobile, attached	suspension feeder	infaunal	5	1	3	5	62	7068
Entolium	Pectinida	Entoliidae	Entolium	2	Early Toarcian		183	182	facultatively mobile, unattached	suspension feeder	epifaunal	4	1	1	7	62	7068
Inoperna sowerbiana	Mytilida	Mytilidae	Inoperna	5	Early Toarcian		183	182	stationary, attached	suspension feeder	epifaunal	2	1	1	4	62	7068
Nicaniella (Nicaniella) voltzi	Carditida	Astartidae	Nicaniella (Nicaniella)	10	Early Toarcian		183	182	facultatively mobile	suspension feeder	infaunal	4	1	3	3	62	7068
Nicaniella (Nicaniella)	Carditida	Astartidae	Nicaniella (Nicaniella)	5	Early Toarcian		183	182	facultatively mobile	suspension feeder	infaunal	4	1	3	3	62	7068
Nuculana (Praesaccella) ovum	Nuculanida	Nuculanidae	Nuculana (Praesaccella)	4	Early Toarcian		183	182	slow motile	deposit feeder, suspension feeder	infaunal	6	2	3	2	62	7068
Palaeoneilo galatea	Nuculanida	Malletiidae	Palaeoneilo	23	Early Toarcian		183	182	slow motile	deposit feeder, suspension feeder	infaunal	6	2	3	2	62	7068
Pinna (Pinna) folium	Ostreida	Pinnidae	Pinna (Pinna)	3	Early Toarcian		183	182	stationary, attached	suspension feeder	semi-infaunal	2	1	2	16	62	7068
Protocardia striatula	Cardiida	Cardiidae	Protocardia	6	Early Toarcian		183	182	facultatively mobile	suspension feeder	infaunal	4	1	3	3	62	7068
Weyla pradoanus	Pectinida	Neitheidae	Weyla	2	Early Toarcian		183	182	stationary, unattached	suspension feeder	semi-infaunal	1	1	2	20	62	7068
Inoperna sowerbiana	Mytilida	Mytilidae	Inoperna	1	Early Toarcian		183	182	stationary, attached	suspension feeder	epifaunal	2	1	1	4	62	7068
Grammatodon concinnus	Arcida	Parallelodontidae	Grammatodon	2	Early Toarcian		183	182	stationary, attached	suspension feeder	epifaunal	2	1	1	4	62	7068
Inoperna sowerbiana	Mytilida	Mytilidae	Inoperna	4	Early Toarcian		183	182	stationary, attached	suspension feeder	epifaunal	2	1	1	4	62	7068
Modiolus	Mytilida	Mytilidae	Modiolus	3	Early Toarcian		183	182	stationary, attached, epibiont	suspension feeder	semi-infaunal	2	1	2	16	62	7068
Parvamussium pumilum	Pectinida	Propeamussiidae	Parvamussium	3	Early Toarcian		183	182	facultatively mobile, unattached	carnivore	epifaunal	4	6	1	9	62	7068
Pinna (Pinna) folium	Ostreida	Pinnidae	Pinna (Pinna)	1	Early Toarcian		183	182	stationary, attached	suspension feeder	semi-infaunal	2	1	2	16	62	7068
Plicatula (Harpax) auricula	Pectinida	Plicatulidae	Plicatula (Harpax)	4	Early Toarcian		183	182	stationary, attached, epibiont	suspension feeder	epifaunal	2	1	1	4	62	7068
Protocardia striatula	Cardiida	Cardiidae	Protocardia	2	Early Toarcian		183	182	facultatively mobile	suspension feeder	infaunal	4	1	3	3	62	7068
Weyla pradoanus	Pectinida	Neitheidae	Weyla	1	Early Toarcian		183	182	stationary, unattached	suspension feeder	semi-infaunal	1	1	2	20	62	7068
Plicatula (Harpax) auricula	Pectinida	Plicatulidae	Plicatula (Harpax)	1	Early Toarcian		183	182	stationary, attached, epibiont	suspension feeder	epifaunal	2	1	1	4	62	7068
Protocardia striatula	Cardiida	Cardiidae	Protocardia	1	Early Toarcian		183	182	facultatively mobile	suspension feeder	infaunal	4	1	3	3	62	7068
Actinostreon gregareum	Ostreida	Palaeolophidae	Actinostreon	14	Early Toarcian		183	182	cemented	suspension feeder	epifaunal	3	1	1	1	62	7068
Arcomytilus asper	Mytilida	Mytilidae	Arcomytilus	4	Early Toarcian		183	182	stationary, attached	suspension feeder	epifaunal	2	1	1	4	62	7068
Chlamys textoria	Pectinida	Pectinidae	Chlamys	2	Early Toarcian		183	182	facultatively mobile, unattached	suspension feeder	epifaunal	4	1	1	7	62	7068
Ctenostreon rugosum	Pectinida	Limidae	Ctenostreon	5	Early Toarcian		183	182	stationary, attached	suspension feeder	low-level epifaunal	2	1	1	4	62	7068
Eopecten velatus	Pectinida	Pectinidae	Eopecten	1	Early Toarcian		183	182	stationary, attached	suspension feeder	low-level epifaunal	2	1	1	4	62	7068
Cosmetodon	Arcida	Parallelodontidae	Cosmetodon	3	Early Toarcian		183	182	facultatively mobile, attached	suspension feeder	low-level epifaunal	5	1	1	19	62	7068
Gryphaea (Bilobissa) sublobata	Ostreida	Gryphaeidae	Gryphaea (Bilobissa)	2	Early Toarcian		183	182	stationary, attached	suspension feeder	epifaunal	2	1	1	4	62	7068
Parvamussium pumilum	Pectinida	Propeamussiidae	Parvamussium	2	Early Toarcian		183	182	facultatively mobile, unattached	carnivore	epifaunal	4	6	1	9	62	7068
Pholadomya (Pholadomya)	Pholadomyida	Pholadomyidae	Pholadomya (Pholadomya)	1	Early Toarcian		183	182	facultatively mobile	suspension feeder	deep infaunal	4	1	4	14	62	7068
Parvamussium pumilum	Pectinida	Propeamussiidae	Parvamussium	3	Early Toarcian		183	182	facultatively mobile, unattached	carnivore	epifaunal	4	6	1	9	62	7068
Pinna (Pinna) opalina	Ostreida	Pinnidae	Pinna (Pinna)	2	Early Toarcian		183	182	stationary, attached	suspension feeder	semi-infaunal	2	1	2	16	62	7068
Pinna	Ostreida	Pinnidae	Pinna	1	Early Toarcian		183	182	stationary, attached	suspension feeder	semi-infaunal	2	1	2	16	62	7068
Placunopsis striatula	Pectinida	Anomiidae	Placunopsis	1	Early Toarcian		183	182	stationary, attached	suspension feeder	epifaunal, gregarious	2	1	1	4	62	7068
Plagiostoma punctatum	Pectinida	Limidae	Plagiostoma	2	Early Toarcian		183	182	stationary, attached	suspension feeder	low-level epifaunal	2	1	1	4	62	7068
Plicatula (Harpax) auricula	Pectinida	Plicatulidae	Plicatula (Harpax)	5	Early Toarcian		183	182	stationary, attached, epibiont	suspension feeder	epifaunal	2	1	1	4	62	7068
Cucullaea (Idonearca) muensteri	Arcida	Cucullaeidae	Cucullaea (Idonearca)	3	Early Toarcian		183	182	facultatively mobile	suspension feeder	infaunal	4	1	3	3	62	7068
Myophorella	Trigoniida	Myophorellidae	Myophorella	1	Early Toarcian		183	182	facultatively mobile	suspension feeder	infaunal	4	1	3	3	62	7068
Parallelodon hirsonensis	Arcida	Parallelodontidae	Parallelodon	9	Early Toarcian		183	182	stationary, attached	suspension feeder	epifaunal	2	1	1	4	62	7068
Parvamussium pumilum	Pectinida	Propeamussiidae	Parvamussium	2	Early Toarcian		183	182	facultatively mobile, unattached	carnivore	epifaunal	4	6	1	9	62	7068
Plicatula (Harpax) auricula	Pectinida	Plicatulidae	Plicatula (Harpax)	5	Early Toarcian		183	182	stationary, attached, epibiont	suspension feeder	epifaunal	2	1	1	4	62	7068
Protocardia striatula	Cardiida	Cardiidae	Protocardia	1	Early Toarcian		183	182	facultatively mobile	suspension feeder	infaunal	4	1	3	3	62	7068
Chlamys textoria	Pectinida	Pectinidae	Chlamys	2	Early Toarcian		183	182	facultatively mobile, unattached	suspension feeder	epifaunal	4	1	1	7	62	7068
Cucullaea (Idonearca) muensteri	Arcida	Cucullaeidae	Cucullaea (Idonearca)	1	Early Toarcian		183	182	facultatively mobile	suspension feeder	infaunal	4	1	3	3	62	7068
Grammatodon concinnus	Arcida	Parallelodontidae	Grammatodon	5	Early Toarcian		183	182	stationary, attached	suspension feeder	epifaunal	2	1	1	4	62	7068
Inoperna sowerbiana	Mytilida	Mytilidae	Inoperna	2	Early Toarcian		183	182	stationary, attached	suspension feeder	epifaunal	2	1	1	4	62	7068
Modiolus	Mytilida	Mytilidae	Modiolus	2	Early Toarcian		183	182	stationary, attached, epibiont	suspension feeder	semi-infaunal	2	1	2	16	62	7068
Palaeoneilo galatea	Nuculanida	Malletiidae	Palaeoneilo	2	Early Toarcian		183	182	slow motile	deposit feeder, suspension feeder	infaunal	6	2	3	2	62	7068
Parvamussium pumilum	Pectinida	Propeamussiidae	Parvamussium	6	Early Toarcian		183	182	facultatively mobile, unattached	carnivore	epifaunal	4	6	1	9	62	7068
Plagiostoma punctatum	Pectinida	Limidae	Plagiostoma	1	Early Toarcian		183	182	stationary, attached	suspension feeder	low-level epifaunal	2	1	1	4	62	7068
Plicatula (Harpax) auricula	Pectinida	Plicatulidae	Plicatula (Harpax)	1	Early Toarcian		183	182	stationary, attached, epibiont	suspension feeder	epifaunal	2	1	1	4	62	7068
Protocardia striatula	Cardiida	Cardiidae	Protocardia	1	Early Toarcian		183	182	facultatively mobile	suspension feeder	infaunal	4	1	3	3	62	7068
Trigonia (Trigonia)	Trigoniida	Trigoniidae	Trigonia (Trigonia)	1	Early Toarcian		183	182	facultatively mobile	suspension feeder	infaunal	4	1	3	3	62	7068
Chlamys textoria	Pectinida	Pectinidae	Chlamys	5	Early Toarcian		183	182	facultatively mobile, unattached	suspension feeder	epifaunal	4	1	1	7	62	7068
Cucullaea (Idonearca) muensteri	Arcida	Cucullaeidae	Cucullaea (Idonearca)	17	Early Toarcian		183	182	facultatively mobile	suspension feeder	infaunal	4	1	3	3	62	7068
Gryphaea (Gryphaea) dumortieri	Ostreida	Gryphaeidae	Gryphaea (Gryphaea)	7	Early Toarcian		183	182	stationary, attached	suspension feeder	epifaunal	2	1	1	4	62	7068
Modiolus	Mytilida	Mytilidae	Modiolus	1	Early Toarcian		183	182	stationary, attached, epibiont	suspension feeder	semi-infaunal	2	1	2	16	62	7068
Parallelodon hirsonensis	Arcida	Parallelodontidae	Parallelodon	2	Early Toarcian		183	182	stationary, attached	suspension feeder	epifaunal	2	1	1	4	62	7068
Parvamussium pumilum	Pectinida	Propeamussiidae	Parvamussium	5	Early Toarcian		183	182	facultatively mobile, unattached	carnivore	epifaunal	4	6	1	9	62	7068
Plagiostoma punctatum	Pectinida	Limidae	Plagiostoma	4	Early Toarcian		183	182	stationary, attached	suspension feeder	low-level epifaunal	2	1	1	4	62	7068
Plicatula (Harpax) auricula	Pectinida	Plicatulidae	Plicatula (Harpax)	4	Early Toarcian		183	182	stationary, attached, epibiont	suspension feeder	epifaunal	2	1	1	4	62	7068
Trigonia (Trigonia)	Trigoniida	Trigoniidae	Trigonia (Trigonia)	2	Early Toarcian		183	182	facultatively mobile	suspension feeder	infaunal	4	1	3	3	62	7068
Gryphaea (Bilobissa) sublobata	Ostreida	Gryphaeidae	Gryphaea (Bilobissa)	5	Early Toarcian		183	182	stationary, attached	suspension feeder	epifaunal	2	1	1	4	62	7068
Limea (Pseudolimea) roemeri	Pectinida	Limidae	Pseudolimea	1	Early Toarcian		183	182	stationary, attached	suspension feeder	low-level epifaunal	2	1	1	4	62	7068
Lycettia lunularis	Mytilida	Mytilidae	Lycettia	8	Early Toarcian		183	182	stationary, attached	suspension feeder	epifaunal	2	1	1	4	62	7068
Parvamussium pumilum	Pectinida	Propeamussiidae	Parvamussium	4	Early Toarcian		183	182	facultatively mobile, unattached	carnivore	epifaunal	4	6	1	9	62	7068
Pholadomya (Pholadomya) ambigua	Pholadomyida	Pholadomyidae	Pholadomya (Pholadomya)	1	Early Toarcian		183	182	facultatively mobile	suspension feeder	deep infaunal	4	1	4	14	62	7068
Plicatula (Harpax) spinosa	Pectinida	Plicatulidae	Plicatula (Harpax)	14	Early Toarcian		183	182	stationary, attached, epibiont	suspension feeder	epifaunal	2	1	1	4	62	7068
Atreta	Pectinida	Dimyidae	Atreta	1	Early Toarcian		183	182	cemented	suspension feeder	epifaunal	3	1	1	1	62	7068
Camptonectes (Camptonectes) auritus	Pectinida	Pectinidae	Camptonectes (Camptonectes)	1	Early Toarcian		183	182	stationary, attached	suspension feeder	low-level epifaunal	2	1	1	4	62	7068
Gryphaea (Catinula) crickleyensis	Ostreida	Gryphaeidae	Gryphaea (Catinula)	1	Early Toarcian		183	182	stationary, attached	suspension feeder	epifaunal	2	1	1	4	62	7068
Gryphaea (Bilobissa) sublobata	Ostreida	Gryphaeidae	Gryphaea (Bilobissa)	19	Early Toarcian		183	182	stationary, attached	suspension feeder	epifaunal	2	1	1	4	62	7068
Limea (Pseudolimea) roemeri	Pectinida	Limidae	Pseudolimea	1	Early Toarcian		183	182	stationary, attached	suspension feeder	low-level epifaunal	2	1	1	4	62	7068
Lithophaga (Lithophaga)	Mytilida	Mytilidae	Lithophaga (Lithophaga)	1	Early Toarcian		183	182	stationary, attached	suspension feeder	boring	2	1	2	16	62	7068
Lycettia lunularis	Mytilida	Mytilidae	Lycettia	9	Early Toarcian		183	182	stationary, attached	suspension feeder	epifaunal	2	1	1	4	62	7068
Nicaniella (Nicaniella) voltzi	Carditida	Astartidae	Nicaniella (Nicaniella)	1	Early Toarcian		183	182	facultatively mobile	suspension feeder	infaunal	4	1	3	3	62	7068
Pachymya	Pholadomyida	Pholadomyidae	Pachymya	2	Early Toarcian		183	182	facultatively mobile	suspension feeder	deep infaunal	4	1	4	14	62	7068
Pleuromya aequistriata	Pholadida	Pleuromyidae	Pleuromya	1	Early Toarcian		183	182	facultatively mobile	suspension feeder	deep infaunal	4	1	4	14	62	7068
Plicatula (Harpax) spinosa	Pectinida	Plicatulidae	Plicatula (Harpax)	1	Early Toarcian		183	182	stationary, attached, epibiont	suspension feeder	epifaunal	2	1	1	4	62	7068
Atreta	Pectinida	Dimyidae	Atreta	1	Early Toarcian		183	182	cemented	suspension feeder	epifaunal	3	1	1	1	62	7068
Gryphaea (Catinula) crickleyensis	Ostreida	Gryphaeidae	Gryphaea (Catinula)	4	Early Toarcian		183	182	stationary, attached	suspension feeder	epifaunal	2	1	1	4	62	7068
Cosmetodon	Arcida	Parallelodontidae	Cosmetodon	2	Early Toarcian		183	182	facultatively mobile, attached	suspension feeder	low-level epifaunal	5	1	1	19	62	7068
Grammatodon concinnus	Arcida	Parallelodontidae	Grammatodon	1	Early Toarcian		183	182	stationary, attached	suspension feeder	epifaunal	2	1	1	4	62	7068
Gryphaea (Bilobissa) sublobata	Ostreida	Gryphaeidae	Gryphaea (Bilobissa)	29	Early Toarcian		183	182	stationary, attached	suspension feeder	epifaunal	2	1	1	4	62	7068
Limea (Pseudolimea) roemeri	Pectinida	Limidae	Pseudolimea	1	Early Toarcian		183	182	stationary, attached	suspension feeder	low-level epifaunal	2	1	1	4	62	7068
Pachymya	Pholadomyida	Pholadomyidae	Pachymya	5	Early Toarcian		183	182	facultatively mobile	suspension feeder	deep infaunal	4	1	4	14	62	7068
Plicatula (Harpax) spinosa	Pectinida	Plicatulidae	Plicatula (Harpax)	3	Early Toarcian		183	182	stationary, attached, epibiont	suspension feeder	epifaunal	2	1	1	4	62	7068
Pecten (Pecten) dentatus	Pectinida	Pectinidae	Pecten (Pecten)	1	Early Toarcian		183	182	facultatively mobile	suspension feeder	epifaunal	4	1	1	7	62	7068
Gryphaea (Catinula) crickleyensis	Ostreida	Gryphaeidae	Gryphaea (Catinula)	2	Early Toarcian		183	182	stationary, attached	suspension feeder	epifaunal	2	1	1	4	62	7068
Cingentolium	Pectinida	Entoliidae	Cingentolium	1	Early Toarcian		183	182	facultatively mobile	suspension feeder	epifaunal	4	1	1	7	62	7068
Corbulomima obscura	Pholadida	Corbulidae	Corbulomima	24	Early Toarcian		183	182	facultatively mobile, attached	suspension feeder	infaunal	5	1	3	5	62	7068
Gryphaea (Gryphaea) dumortieri	Ostreida	Gryphaeidae	Gryphaea (Gryphaea)	7	Early Toarcian		183	182	stationary, attached	suspension feeder	epifaunal	2	1	1	4	62	7068
Inoperna sowerbiana	Mytilida	Mytilidae	Inoperna	3	Early Toarcian		183	182	stationary, attached	suspension feeder	epifaunal	2	1	1	4	62	7068
Lithophaga (Lithophaga)	Mytilida	Mytilidae	Lithophaga (Lithophaga)	1	Early Toarcian		183	182	stationary, attached	suspension feeder	boring	2	1	2	16	62	7068
Nicaniella (Nicaniella) voltzi	Carditida	Astartidae	Nicaniella (Nicaniella)	9	Early Toarcian		183	182	facultatively mobile	suspension feeder	infaunal	4	1	3	3	62	7068
Nicaniella (Nicaniella)	Carditida	Astartidae	Nicaniella (Nicaniella)	8	Early Toarcian		183	182	facultatively mobile	suspension feeder	infaunal	4	1	3	3	62	7068
Parvamussium pumilum	Pectinida	Propeamussiidae	Parvamussium	1	Early Toarcian		183	182	facultatively mobile, unattached	carnivore	epifaunal	4	6	1	9	62	7068
Cingentolium	Pectinida	Entoliidae	Cingentolium	1	Early Toarcian		183	182	facultatively mobile	suspension feeder	epifaunal	4	1	1	7	62	7068
Corbulomima obscura	Pholadida	Corbulidae	Corbulomima	36	Early Toarcian		183	182	facultatively mobile, attached	suspension feeder	infaunal	5	1	3	5	62	7068
Grammatodon concinnus	Arcida	Parallelodontidae	Grammatodon	1	Early Toarcian		183	182	stationary, attached	suspension feeder	epifaunal	2	1	1	4	62	7068
Gryphaea (Bilobissa) sublobata	Ostreida	Gryphaeidae	Gryphaea (Bilobissa)	41	Early Toarcian		183	182	stationary, attached	suspension feeder	epifaunal	2	1	1	4	62	7068
Inoperna sowerbiana	Mytilida	Mytilidae	Inoperna	2	Early Toarcian		183	182	stationary, attached	suspension feeder	epifaunal	2	1	1	4	62	7068
Nicaniella (Nicaniella) voltzi	Carditida	Astartidae	Nicaniella (Nicaniella)	15	Early Toarcian		183	182	facultatively mobile	suspension feeder	infaunal	4	1	3	3	62	7068
Nicaniella (Nicaniella)	Carditida	Astartidae	Nicaniella (Nicaniella)	23	Early Toarcian		183	182	facultatively mobile	suspension feeder	infaunal	4	1	3	3	62	7068
Placunopsis striatula	Pectinida	Anomiidae	Placunopsis	1	Early Toarcian		183	182	stationary, attached	suspension feeder	epifaunal, gregarious	2	1	1	4	62	7068
Pleuromya aequistriata	Pholadida	Pleuromyidae	Pleuromya	3	Early Toarcian		183	182	facultatively mobile	suspension feeder	deep infaunal	4	1	4	14	62	7068
Gryphaea (Catinula) crickleyensis	Ostreida	Gryphaeidae	Gryphaea (Catinula)	2	Early Toarcian		183	182	stationary, attached	suspension feeder	epifaunal	2	1	1	4	62	7068
Cosmetodon	Arcida	Parallelodontidae	Cosmetodon	2	Early Toarcian		183	182	facultatively mobile, attached	suspension feeder	low-level epifaunal	5	1	1	19	62	7068
Grammatodon concinnus	Arcida	Parallelodontidae	Grammatodon	2	Early Toarcian		183	182	stationary, attached	suspension feeder	epifaunal	2	1	1	4	62	7068
Gryphaea (Bilobissa) sublobata	Ostreida	Gryphaeidae	Gryphaea (Bilobissa)	82	Early Toarcian		183	182	stationary, attached	suspension feeder	epifaunal	2	1	1	4	62	7068
Lima (Mantellum) duplicata	Pectinida	Limidae	Lima (Mantellum)	2	Early Toarcian		183	182	facultatively mobile	suspension feeder	epifaunal	2	1	1	4	62	7068
Lithophaga (Lithophaga)	Mytilida	Mytilidae	Lithophaga (Lithophaga)	2	Early Toarcian		183	182	stationary, attached	suspension feeder	boring	2	1	2	16	62	7068
Lycettia lunularis	Mytilida	Mytilidae	Lycettia	1	Early Toarcian		183	182	stationary, attached	suspension feeder	epifaunal	2	1	1	4	62	7068
Nicaniella (Nicaniella) voltzi	Carditida	Astartidae	Nicaniella (Nicaniella)	4	Early Toarcian		183	182	facultatively mobile	suspension feeder	infaunal	4	1	3	3	62	7068
Pachymya	Pholadomyida	Pholadomyidae	Pachymya	9	Early Toarcian		183	182	facultatively mobile	suspension feeder	deep infaunal	4	1	4	14	62	7068
Plicatula (Harpax) spinosa	Pectinida	Plicatulidae	Plicatula (Harpax)	3	Early Toarcian		183	182	stationary, attached, epibiont	suspension feeder	epifaunal	2	1	1	4	62	7068
Pecten (Pecten) dentatus	Pectinida	Pectinidae	Pecten (Pecten)	1	Early Toarcian		183	182	facultatively mobile	suspension feeder	epifaunal	4	1	1	7	62	7068
Eopecten velatus	Pectinida	Pectinidae	Eopecten	1	Early Toarcian		183	182	stationary, attached	suspension feeder	low-level epifaunal	2	1	1	4	62	7068
Gryphaea (Bilobissa) sublobata	Ostreida	Gryphaeidae	Gryphaea (Bilobissa)	38	Early Toarcian		183	182	stationary, attached	suspension feeder	epifaunal	2	1	1	4	62	7068
Limea (Pseudolimea) roemeri	Pectinida	Limidae	Pseudolimea	1	Early Toarcian		183	182	stationary, attached	suspension feeder	low-level epifaunal	2	1	1	4	62	7068
Lycettia lunularis	Mytilida	Mytilidae	Lycettia	1	Early Toarcian		183	182	stationary, attached	suspension feeder	epifaunal	2	1	1	4	62	7068
Pachymya	Pholadomyida	Pholadomyidae	Pachymya	1	Early Toarcian		183	182	facultatively mobile	suspension feeder	deep infaunal	4	1	4	14	62	7068
Plicatula (Harpax) spinosa	Pectinida	Plicatulidae	Plicatula (Harpax)	1	Early Toarcian		183	182	stationary, attached, epibiont	suspension feeder	epifaunal	2	1	1	4	62	7068
Gryphaea (Catinula) crickleyensis	Ostreida	Gryphaeidae	Gryphaea (Catinula)	1	Early Toarcian		183	182	stationary, attached	suspension feeder	epifaunal	2	1	1	4	62	7068
Gryphaea (Bilobissa) sublobata	Ostreida	Gryphaeidae	Gryphaea (Bilobissa)	31	Early Toarcian		183	182	stationary, attached	suspension feeder	epifaunal	2	1	1	4	62	7068
Inoperna sowerbiana	Mytilida	Mytilidae	Inoperna	1	Early Toarcian		183	182	stationary, attached	suspension feeder	epifaunal	2	1	1	4	62	7068
Pachymya	Pholadomyida	Pholadomyidae	Pachymya	1	Early Toarcian		183	182	facultatively mobile	suspension feeder	deep infaunal	4	1	4	14	62	7068
Plicatula (Harpax) spinosa	Pectinida	Plicatulidae	Plicatula (Harpax)	1	Early Toarcian		183	182	stationary, attached, epibiont	suspension feeder	epifaunal	2	1	1	4	62	7068
Pecten (Pecten) dentatus	Pectinida	Pectinidae	Pecten (Pecten)	1	Early Toarcian		183	182	facultatively mobile	suspension feeder	epifaunal	4	1	1	7	62	7068
Camptonectes (Camptonectes) auritus	Pectinida	Pectinidae	Camptonectes (Camptonectes)	1	Early Toarcian		183	182	stationary, attached	suspension feeder	low-level epifaunal	2	1	1	4	62	7068
Gryphaea (Bilobissa) sublobata	Ostreida	Gryphaeidae	Gryphaea (Bilobissa)	3	Early Toarcian		183	182	stationary, attached	suspension feeder	epifaunal	2	1	1	4	62	7068
Inoperna sowerbiana	Mytilida	Mytilidae	Inoperna	1	Early Toarcian		183	182	stationary, attached	suspension feeder	epifaunal	2	1	1	4	62	7068
Modiolus gerthi	Mytilida	Mytilidae	Modiolus	2	Early Toarcian		183	182	stationary, attached, epibiont	suspension feeder	semi-infaunal	2	1	2	16	62	7068
Pholadomya (Pholadomya) ambigua	Pholadomyida	Pholadomyidae	Pholadomya (Pholadomya)	2	Early Toarcian		183	182	facultatively mobile	suspension feeder	deep infaunal	4	1	4	14	62	7068
Gryphaea (Catinula) crickleyensis	Ostreida	Gryphaeidae	Gryphaea (Catinula)	2	Early Toarcian		183	182	stationary, attached	suspension feeder	epifaunal	2	1	1	4	62	7068
Gryphaea (Bilobissa) sublobata	Ostreida	Gryphaeidae	Gryphaea (Bilobissa)	13	Early Toarcian		183	182	stationary, attached	suspension feeder	epifaunal	2	1	1	4	62	7068
Nanogyra monoptera	Ostreida	Gryphaeidae	Nanogyra	3	Early Toarcian		183	182	stationary, attached	suspension feeder	epifaunal	2	1	1	4	62	7068
Nicaniella (Nicaniella)	Carditida	Astartidae	Nicaniella (Nicaniella)	1	Early Toarcian		183	182	facultatively mobile	suspension feeder	infaunal	4	1	3	3	62	7068
Pinna (Pinna) folium	Ostreida	Pinnidae	Pinna (Pinna)	1	Early Toarcian		183	182	stationary, attached	suspension feeder	semi-infaunal	2	1	2	16	62	7068
Harpax rapa	Pectinida	Plicatulidae	Harpax	1	Early Toarcian		183	182	cemented	suspension feeder	epifaunal	3	1	1	1	62	7068
Plicatula (Harpax) spinosa	Pectinida	Plicatulidae	Plicatula (Harpax)	33	Early Toarcian		183	182	stationary, attached, epibiont	suspension feeder	epifaunal	2	1	1	4	62	7068
Pecten (Pecten) dentatus	Pectinida	Pectinidae	Pecten (Pecten)	1	Early Toarcian		183	182	facultatively mobile	suspension feeder	epifaunal	4	1	1	7	62	7068
Parallelodon hirsonensis	Arcida	Parallelodontidae	Parallelodon	1	Early Toarcian		183	182	stationary, attached	suspension feeder	epifaunal	2	1	1	4	62	7068
Anisocardia	Veneroidei	Arcticidae	Anisocardia	1	Early Toarcian		183	182	facultatively mobile	suspension feeder	infaunal	4	1	3	3	62	7068
Arcomytilus asper	Mytilida	Mytilidae	Arcomytilus	2	Early Toarcian		183	182	stationary, attached	suspension feeder	epifaunal	2	1	1	4	62	7068
Coelopis (Coelopis)	Carditida	Astartidae	Coelopis (Coelopis)	1	Early Toarcian		183	182	slow motile	suspension feeder	infaunal	6	1	3	17	62	7068
Grammatodon concinnus	Arcida	Parallelodontidae	Grammatodon	1	Early Toarcian		183	182	stationary, attached	suspension feeder	epifaunal	2	1	1	4	62	7068
Gryphaea (Bilobissa) sublobata	Ostreida	Gryphaeidae	Gryphaea (Bilobissa)	27	Early Toarcian		183	182	stationary, attached	suspension feeder	epifaunal	2	1	1	4	62	7068
Modiolus gerthi	Mytilida	Mytilidae	Modiolus	1	Early Toarcian		183	182	stationary, attached, epibiont	suspension feeder	semi-infaunal	2	1	2	16	62	7068
Nicaniella (Nicaniella) voltzi	Carditida	Astartidae	Nicaniella (Nicaniella)	2	Early Toarcian		183	182	facultatively mobile	suspension feeder	infaunal	4	1	3	3	62	7068
Pachymya	Pholadomyida	Pholadomyidae	Pachymya	1	Early Toarcian		183	182	facultatively mobile	suspension feeder	deep infaunal	4	1	4	14	62	7068
Plicatula (Harpax) spinosa	Pectinida	Plicatulidae	Plicatula (Harpax)	4	Early Toarcian		183	182	stationary, attached, epibiont	suspension feeder	epifaunal	2	1	1	4	62	7068
Pecten (Pecten) dentatus	Pectinida	Pectinidae	Pecten (Pecten)	4	Early Toarcian		183	182	facultatively mobile	suspension feeder	epifaunal	4	1	1	7	62	7068
Grammatodon concinnus	Arcida	Parallelodontidae	Grammatodon	1	Early Toarcian		183	182	stationary, attached	suspension feeder	epifaunal	2	1	1	4	62	7068
Gryphaea (Bilobissa) sublobata	Ostreida	Gryphaeidae	Gryphaea (Bilobissa)	27	Early Toarcian		183	182	stationary, attached	suspension feeder	epifaunal	2	1	1	4	62	7068
Lithophaga (Lithophaga)	Mytilida	Mytilidae	Lithophaga (Lithophaga)	1	Early Toarcian		183	182	stationary, attached	suspension feeder	boring	2	1	2	16	62	7068
Modiolus gerthi	Mytilida	Mytilidae	Modiolus	2	Early Toarcian		183	182	stationary, attached, epibiont	suspension feeder	semi-infaunal	2	1	2	16	62	7068
Plicatula (Harpax) spinosa	Pectinida	Plicatulidae	Plicatula (Harpax)	2	Early Toarcian		183	182	stationary, attached, epibiont	suspension feeder	epifaunal	2	1	1	4	62	7068
Protocardia striatula	Cardiida	Cardiidae	Protocardia	2	Early Toarcian		183	182	facultatively mobile	suspension feeder	infaunal	4	1	3	3	62	7068
Pecten (Pecten) dentatus	Pectinida	Pectinidae	Pecten (Pecten)	4	Early Toarcian		183	182	facultatively mobile	suspension feeder	epifaunal	4	1	1	7	62	7068
Pterocardia	Cardiida	Pterocardiidae	Pterocardia	2	Early Toarcian		183	182	facultatively mobile	suspension feeder	infaunal	4	1	3	3	62	7068
Gryphaea (Bilobissa) sublobata	Ostreida	Gryphaeidae	Gryphaea (Bilobissa)	17	Early Toarcian		183	182	stationary, attached	suspension feeder	epifaunal	2	1	1	4	62	7068
Homomya ventricosa	Pholadomyida	Pholadomyidae	Homomya	1	Early Toarcian		183	182	facultatively mobile	suspension feeder	deep infaunal	4	1	3	3	62	7068
Lima (Mantellum) duplicata	Pectinida	Limidae	Lima (Mantellum)	2	Early Toarcian		183	182	facultatively mobile	suspension feeder	epifaunal	2	1	1	4	62	7068
Nanogyra auricularis	Ostreida	Gryphaeidae	Nanogyra	3	Early Toarcian		183	182	stationary, attached	suspension feeder	epifaunal	2	1	1	4	62	7068
Nicaniella (Nicaniella) voltzi	Carditida	Astartidae	Nicaniella (Nicaniella)	1	Early Toarcian		183	182	facultatively mobile	suspension feeder	infaunal	4	1	3	3	62	7068
Pecten (Pecten) dentatus	Pectinida	Pectinidae	Pecten (Pecten)	11	Early Toarcian		183	182	facultatively mobile	suspension feeder	epifaunal	4	1	1	7	62	7068
Entolium (Entolium) corneolum	Pectinida	Entoliidae	Entolium (Entolium)	1	Early Toarcian		183	182	facultatively mobile	suspension feeder	epifaunal	4	1	1	7	62	7068
Grammatodon concinnus	Arcida	Parallelodontidae	Grammatodon	2	Early Toarcian		183	182	stationary, attached	suspension feeder	epifaunal	2	1	1	4	62	7068
Gryphaea (Bilobissa) sublobata	Ostreida	Gryphaeidae	Gryphaea (Bilobissa)	27	Early Toarcian		183	182	stationary, attached	suspension feeder	epifaunal	2	1	1	4	62	7068
Inoperna sowerbiana	Mytilida	Mytilidae	Inoperna	1	Early Toarcian		183	182	stationary, attached	suspension feeder	epifaunal	2	1	1	4	62	7068
Lima (Mantellum) duplicata	Pectinida	Limidae	Lima (Mantellum)	2	Early Toarcian		183	182	facultatively mobile	suspension feeder	epifaunal	2	1	1	4	62	7068
Lithophaga (Lithophaga)	Mytilida	Mytilidae	Lithophaga (Lithophaga)	1	Early Toarcian		183	182	stationary, attached	suspension feeder	boring	2	1	2	16	62	7068
Pholadomya (Pholadomya) ambigua	Pholadomyida	Pholadomyidae	Pholadomya (Pholadomya)	1	Early Toarcian		183	182	facultatively mobile	suspension feeder	deep infaunal	4	1	4	14	62	7068
Pinna (Pinna) folium	Ostreida	Pinnidae	Pinna (Pinna)	28	Early Toarcian		183	182	stationary, attached	suspension feeder	semi-infaunal	2	1	2	16	62	7068
Plagiostoma punctatum	Pectinida	Limidae	Plagiostoma	1	Early Toarcian		183	182	stationary, attached	suspension feeder	low-level epifaunal	2	1	1	4	62	7068
Protocardia striatula	Cardiida	Cardiidae	Protocardia	1	Early Toarcian		183	182	facultatively mobile	suspension feeder	infaunal	4	1	3	3	62	7068
Pecten (Pecten) dentatus	Pectinida	Pectinidae	Pecten (Pecten)	7	Early Toarcian		183	182	facultatively mobile	suspension feeder	epifaunal	4	1	1	7	62	7068
Pseudotrapezium	Veneroidei	Arcticidae	Pseudotrapezium	1	Early Toarcian		183	182	facultatively mobile	suspension feeder	infaunal	4	1	3	3	62	7068
Coelopis (Coelopis)	Carditida	Astartidae	Coelopis (Coelopis)	1	Early Toarcian		183	182	slow motile	suspension feeder	infaunal	6	1	3	17	62	7068
Eopecten velatus	Pectinida	Pectinidae	Eopecten	2	Early Toarcian		183	182	stationary, attached	suspension feeder	low-level epifaunal	2	1	1	4	62	7068
Grammatodon concinnus	Arcida	Parallelodontidae	Grammatodon	3	Early Toarcian		183	182	stationary, attached	suspension feeder	epifaunal	2	1	1	4	62	7068
Gryphaea (Bilobissa) sublobata	Ostreida	Gryphaeidae	Gryphaea (Bilobissa)	43	Early Toarcian		183	182	stationary, attached	suspension feeder	epifaunal	2	1	1	4	62	7068
Inoperna sowerbiana	Mytilida	Mytilidae	Inoperna	5	Early Toarcian		183	182	stationary, attached	suspension feeder	epifaunal	2	1	1	4	62	7068
Lima (Mantellum) duplicata	Pectinida	Limidae	Lima (Mantellum)	2	Early Toarcian		183	182	facultatively mobile	suspension feeder	epifaunal	2	1	1	4	62	7068
Lithophaga (Lithophaga)	Mytilida	Mytilidae	Lithophaga (Lithophaga)	1	Early Toarcian		183	182	stationary, attached	suspension feeder	boring	2	1	2	16	62	7068
Modiolus gerthi	Mytilida	Mytilidae	Modiolus	2	Early Toarcian		183	182	stationary, attached, epibiont	suspension feeder	semi-infaunal	2	1	2	16	62	7068
Nicaniella (Nicaniella) voltzi	Carditida	Astartidae	Nicaniella (Nicaniella)	1	Early Toarcian		183	182	facultatively mobile	suspension feeder	infaunal	4	1	3	3	62	7068
Osteomya dilata	Pholadomyida	Pholadomyidae	Osteomya	1	Early Toarcian		183	182	facultatively motile, unattached;	suspension feeder	shallow infaunal	4	1	3	3	62	7068
Parallelodon hirsonensis	Arcida	Parallelodontidae	Parallelodon	1	Early Toarcian		183	182	stationary, attached	suspension feeder	epifaunal	2	1	1	4	62	7068
Pecten (Pecten) dentatus	Pectinida	Pectinidae	Pecten (Pecten)	5	Early Toarcian		183	182	facultatively mobile	suspension feeder	epifaunal	4	1	1	7	62	7068
Weyla pradoanus	Pectinida	Neitheidae	Weyla	1	Early Toarcian		183	182	stationary, unattached	suspension feeder	semi-infaunal	1	1	2	20	62	7068
Atreta	Pectinida	Dimyidae	Atreta	1	Early Toarcian		183	182	cemented	suspension feeder	epifaunal	3	1	1	1	62	7068
Camptonectes (Camptonectes) auritus	Pectinida	Pectinidae	Camptonectes (Camptonectes)	1	Early Toarcian		183	182	stationary, attached	suspension feeder	low-level epifaunal	2	1	1	4	62	7068
Ceratomya concentrica	Pholadida	Ceratomyidae	Ceratomya	1	Early Toarcian		183	182	facultatively mobile	suspension feeder	infaunal	4	1	3	3	62	7068
Corbulomima obscura	Pholadida	Corbulidae	Corbulomima	2	Early Toarcian		183	182	facultatively mobile, attached	suspension feeder	infaunal	5	1	3	5	62	7068
Eopecten velatus	Pectinida	Pectinidae	Eopecten	2	Early Toarcian		183	182	stationary, attached	suspension feeder	low-level epifaunal	2	1	1	4	62	7068
Grammatodon concinnus	Arcida	Parallelodontidae	Grammatodon	10	Early Toarcian		183	182	stationary, attached	suspension feeder	epifaunal	2	1	1	4	62	7068
Gryphaea (Bilobissa) sublobata	Ostreida	Gryphaeidae	Gryphaea (Bilobissa)	27	Early Toarcian		183	182	stationary, attached	suspension feeder	epifaunal	2	1	1	4	62	7068
Inoperna sowerbiana	Mytilida	Mytilidae	Inoperna	6	Early Toarcian		183	182	stationary, attached	suspension feeder	epifaunal	2	1	1	4	62	7068
Modiolus gerthi	Mytilida	Mytilidae	Modiolus	1	Early Toarcian		183	182	stationary, attached, epibiont	suspension feeder	semi-infaunal	2	1	2	16	62	7068
Nicaniella (Nicaniella) voltzi	Carditida	Astartidae	Nicaniella (Nicaniella)	3	Early Toarcian		183	182	facultatively mobile	suspension feeder	infaunal	4	1	3	3	62	7068
Pholadomya (Pholadomya)	Pholadomyida	Pholadomyidae	Pholadomya (Pholadomya)	1	Early Toarcian		183	182	facultatively mobile	suspension feeder	deep infaunal	4	1	4	14	62	7068
Plagiostoma punctatum	Pectinida	Limidae	Plagiostoma	8	Early Toarcian		183	182	stationary, attached	suspension feeder	low-level epifaunal	2	1	1	4	62	7068
Pleuromya aequistriata	Pholadida	Pleuromyidae	Pleuromya	3	Early Toarcian		183	182	facultatively mobile	suspension feeder	deep infaunal	4	1	4	14	62	7068
Pronoella	Veneroidei	Arcticidae	Pronoella	2	Early Toarcian		183	182	facultatively mobile	suspension feeder	infaunal	4	1	3	3	62	7068
Protocardia striatula	Cardiida	Cardiidae	Protocardia	4	Early Toarcian		183	182	facultatively mobile	suspension feeder	infaunal	4	1	3	3	62	7068
Pecten (Pecten) dentatus	Pectinida	Pectinidae	Pecten (Pecten)	1	Early Toarcian		183	182	facultatively mobile	suspension feeder	epifaunal	4	1	1	7	62	7068
Pterocardia	Cardiida	Pterocardiidae	Pterocardia	1	Early Toarcian		183	182	facultatively mobile	suspension feeder	infaunal	4	1	3	3	62	7068
Mactromya cardioides	Lucinida	Mactromyidae	Mactromya	1	Early Toarcian		183	182	facultatively mobile	chemosymbiotic	deep infaunal	4	9	3	11	62	7068
Weyla pradoanus	Pectinida	Neitheidae	Weyla	2	Early Toarcian		183	182	stationary, unattached	suspension feeder	semi-infaunal	1	1	2	20	62	7068
Entolium (Entolium) corneolum	Pectinida	Entoliidae	Entolium (Entolium)	1	Early Toarcian		183	182	facultatively mobile	suspension feeder	epifaunal	4	1	1	7	62	7068
Gryphaea (Bilobissa) sublobata	Ostreida	Gryphaeidae	Gryphaea (Bilobissa)	8	Early Toarcian		183	182	stationary, attached	suspension feeder	epifaunal	2	1	1	4	62	7068
Inoperna sowerbiana	Mytilida	Mytilidae	Inoperna	1	Early Toarcian		183	182	stationary, attached	suspension feeder	epifaunal	2	1	1	4	62	7068
Pecten (Pecten) dentatus	Pectinida	Pectinidae	Pecten (Pecten)	1	Early Toarcian		183	182	facultatively mobile	suspension feeder	epifaunal	4	1	1	7	62	7068
Gryphaea (Catinula) crickleyensis	Ostreida	Gryphaeidae	Gryphaea (Catinula)	1	Early Toarcian		183	182	stationary, attached	suspension feeder	epifaunal	2	1	1	4	62	7068
Ceratomya concentrica	Pholadida	Ceratomyidae	Ceratomya	2	Early Toarcian		183	182	facultatively mobile	suspension feeder	infaunal	4	1	3	3	62	7068
Coelopis (Coelopis) parvocardinata	Carditida	Astartidae	Coelopis (Coelopis)	1	Early Toarcian		183	182	slow motile	suspension feeder	infaunal	6	1	3	17	62	7068
Gryphaea (Bilobissa) sublobata	Ostreida	Gryphaeidae	Gryphaea (Bilobissa)	19	Early Toarcian		183	182	stationary, attached	suspension feeder	epifaunal	2	1	1	4	62	7068
Parallelodon hirsonensis	Arcida	Parallelodontidae	Parallelodon	5	Early Toarcian		183	182	stationary, attached	suspension feeder	epifaunal	2	1	1	4	62	7068
Pholadomya (Pholadomya)	Pholadomyida	Pholadomyidae	Pholadomya (Pholadomya)	1	Early Toarcian		183	182	facultatively mobile	suspension feeder	deep infaunal	4	1	4	14	62	7068
Plagiostoma punctatum	Pectinida	Limidae	Plagiostoma	2	Early Toarcian		183	182	stationary, attached	suspension feeder	low-level epifaunal	2	1	1	4	62	7068
Plicatula (Harpax) spinosa	Pectinida	Plicatulidae	Plicatula (Harpax)	1	Early Toarcian		183	182	stationary, attached, epibiont	suspension feeder	epifaunal	2	1	1	4	62	7068
Weyla pradoanus	Pectinida	Neitheidae	Weyla	1	Early Toarcian		183	182	stationary, unattached	suspension feeder	semi-infaunal	1	1	2	20	62	7068
Ceratomya concentrica	Pholadida	Ceratomyidae	Ceratomya	1	Early Toarcian		183	182	facultatively mobile	suspension feeder	infaunal	4	1	3	3	62	7068
Gryphaea (Bilobissa) sublobata	Ostreida	Gryphaeidae	Gryphaea (Bilobissa)	4	Early Toarcian		183	182	stationary, attached	suspension feeder	epifaunal	2	1	1	4	62	7068
Inoperna sowerbiana	Mytilida	Mytilidae	Inoperna	1	Early Toarcian		183	182	stationary, attached	suspension feeder	epifaunal	2	1	1	4	62	7068
Parvamussium pumilum	Pectinida	Propeamussiidae	Parvamussium	1	Early Toarcian		183	182	facultatively mobile, unattached	carnivore	epifaunal	4	6	1	9	62	7068
Mactromya cardioides	Lucinida	Mactromyidae	Mactromya	1	Early Toarcian		183	182	facultatively mobile	chemosymbiotic	deep infaunal	4	9	3	11	62	7068
Weyla pradoanus	Pectinida	Neitheidae	Weyla	2	Early Toarcian		183	182	stationary, unattached	suspension feeder	semi-infaunal	1	1	2	20	62	7068
Camptonectes (Camptonectes) auritus	Pectinida	Pectinidae	Camptonectes (Camptonectes)	1	Early Toarcian		183	182	stationary, attached	suspension feeder	low-level epifaunal	2	1	1	4	62	7068
Gryphaea (Gryphaea) dumortieri	Ostreida	Gryphaeidae	Gryphaea (Gryphaea)	1	Early Toarcian		183	182	stationary, attached	suspension feeder	epifaunal	2	1	1	4	62	7068
Gryphaea (Bilobissa) sublobata	Ostreida	Gryphaeidae	Gryphaea (Bilobissa)	3	Early Toarcian		183	182	stationary, attached	suspension feeder	epifaunal	2	1	1	4	62	7068
Inoperna sowerbiana	Mytilida	Mytilidae	Inoperna	1	Early Toarcian		183	182	stationary, attached	suspension feeder	epifaunal	2	1	1	4	62	7068
Nanogyra monoptera	Ostreida	Gryphaeidae	Nanogyra	1	Early Toarcian		183	182	stationary, attached	suspension feeder	epifaunal	2	1	1	4	62	7068
Parallelodon hirsonensis	Arcida	Parallelodontidae	Parallelodon	1	Early Toarcian		183	182	stationary, attached	suspension feeder	epifaunal	2	1	1	4	62	7068
Pinna (Pinna) folium	Ostreida	Pinnidae	Pinna (Pinna)	1	Early Toarcian		183	182	stationary, attached	suspension feeder	semi-infaunal	2	1	2	16	62	7068
Plicatula (Harpax) auricula	Pectinida	Plicatulidae	Plicatula (Harpax)	1	Early Toarcian		183	182	stationary, attached, epibiont	suspension feeder	epifaunal	2	1	1	4	62	7068
Protocardia striatula	Cardiida	Cardiidae	Protocardia	1	Early Toarcian		183	182	facultatively mobile	suspension feeder	infaunal	4	1	3	3	62	7068
Weyla pradoanus	Pectinida	Neitheidae	Weyla	3	Early Toarcian		183	182	stationary, unattached	suspension feeder	semi-infaunal	1	1	2	20	62	7068
Arcomytilus	Mytilida	Mytilidae	Arcomytilus	1	Early Toarcian		183	182	stationary, attached	suspension feeder	epifaunal	2	1	1	4	62	7068
Ceratomya concentrica	Pholadida	Ceratomyidae	Ceratomya	5	Early Toarcian		183	182	facultatively mobile	suspension feeder	infaunal	4	1	3	3	62	7068
Gryphaea (Bilobissa) sublobata	Ostreida	Gryphaeidae	Gryphaea (Bilobissa)	1	Early Toarcian		183	182	stationary, attached	suspension feeder	epifaunal	2	1	1	4	62	7068
Inoperna sowerbiana	Mytilida	Mytilidae	Inoperna	6	Early Toarcian		183	182	stationary, attached	suspension feeder	epifaunal	2	1	1	4	62	7068
Parallelodon hirsonensis	Arcida	Parallelodontidae	Parallelodon	1	Early Toarcian		183	182	stationary, attached	suspension feeder	epifaunal	2	1	1	4	62	7068
Pinna (Pinna) folium	Ostreida	Pinnidae	Pinna (Pinna)	1	Early Toarcian		183	182	stationary, attached	suspension feeder	semi-infaunal	2	1	2	16	62	7068
Plicatula (Harpax) spinosa	Pectinida	Plicatulidae	Plicatula (Harpax)	2	Early Toarcian		183	182	stationary, attached, epibiont	suspension feeder	epifaunal	2	1	1	4	62	7068
Pronoella	Veneroidei	Arcticidae	Pronoella	1	Early Toarcian		183	182	facultatively mobile	suspension feeder	infaunal	4	1	3	3	62	7068
Protocardia striatula	Cardiida	Cardiidae	Protocardia	8	Early Toarcian		183	182	facultatively mobile	suspension feeder	infaunal	4	1	3	3	62	7068
Weyla pradoanus	Pectinida	Neitheidae	Weyla	2	Early Toarcian		183	182	stationary, unattached	suspension feeder	semi-infaunal	1	1	2	20	62	7068
Camptonectes	Pectinida	Pectinidae	Camptonectes	3	Early Toarcian		183	182	stationary, attached	suspension feeder	low-level epifaunal	2	1	1	4	62	7068
Ceratomya concentrica	Pholadida	Ceratomyidae	Ceratomya	1	Early Toarcian		183	182	facultatively mobile	suspension feeder	infaunal	4	1	3	3	62	7068
Coelopis (Coelopis) parvocardinata	Carditida	Astartidae	Coelopis (Coelopis)	3	Early Toarcian		183	182	slow motile	suspension feeder	infaunal	6	1	3	17	62	7068
Corbulomima obscura	Pholadida	Corbulidae	Corbulomima	28	Early Toarcian		183	182	facultatively mobile, attached	suspension feeder	infaunal	5	1	3	5	62	7068
Inoperna sowerbiana	Mytilida	Mytilidae	Inoperna	11	Early Toarcian		183	182	stationary, attached	suspension feeder	epifaunal	2	1	1	4	62	7068
Nicaniella (Nicaniella) voltzi	Carditida	Astartidae	Nicaniella (Nicaniella)	2	Early Toarcian		183	182	facultatively mobile	suspension feeder	infaunal	4	1	3	3	62	7068
Nicaniella (Nicaniella)	Carditida	Astartidae	Nicaniella (Nicaniella)	1	Early Toarcian		183	182	facultatively mobile	suspension feeder	infaunal	4	1	3	3	62	7068
Pinna (Pinna) folium	Ostreida	Pinnidae	Pinna (Pinna)	1	Early Toarcian		183	182	stationary, attached	suspension feeder	semi-infaunal	2	1	2	16	62	7068
Plagiostoma punctatum	Pectinida	Limidae	Plagiostoma	1	Early Toarcian		183	182	stationary, attached	suspension feeder	low-level epifaunal	2	1	1	4	62	7068
Protocardia striatula	Cardiida	Cardiidae	Protocardia	1	Early Toarcian		183	182	facultatively mobile	suspension feeder	infaunal	4	1	3	3	62	7068
Weyla pradoanus	Pectinida	Neitheidae	Weyla	1	Early Toarcian		183	182	stationary, unattached	suspension feeder	semi-infaunal	1	1	2	20	62	7068
Parvamussium pumilum	Pectinida	Propeamussiidae	Parvamussium	14	Early Toarcian		183	182	facultatively mobile, unattached	carnivore	epifaunal	4	6	1	9	62	7068
Pholadomya (Pholadomya)	Pholadomyida	Pholadomyidae	Pholadomya (Pholadomya)	1	Early Toarcian		183	182	facultatively mobile	suspension feeder	deep infaunal	4	1	4	14	62	7068
Pinna (Pinna) folium	Ostreida	Pinnidae	Pinna (Pinna)	1	Early Toarcian		183	182	stationary, attached	suspension feeder	semi-infaunal	2	1	2	16	62	7068
Gryphaea (Catinula) crickleyensis	Ostreida	Gryphaeidae	Gryphaea (Catinula)	1	Early Toarcian		183	182	stationary, attached	suspension feeder	epifaunal	2	1	1	4	62	7068
Parvamussium pumilum	Pectinida	Propeamussiidae	Parvamussium	29	Early Toarcian		183	182	facultatively mobile, unattached	carnivore	epifaunal	4	6	1	9	62	7068
Pinna (Pinna) folium	Ostreida	Pinnidae	Pinna (Pinna)	1	Early Toarcian		183	182	stationary, attached	suspension feeder	semi-infaunal	2	1	2	16	62	7068
Nicaniella (Nicaniella) voltzi	Carditida	Astartidae	Nicaniella (Nicaniella)	1	Early Toarcian		183	182	facultatively mobile	suspension feeder	infaunal	4	1	3	3	62	7068
Parvamussium pumilum	Pectinida	Propeamussiidae	Parvamussium	1	Early Toarcian		183	182	facultatively mobile, unattached	carnivore	epifaunal	4	6	1	9	62	7068
Plagiostoma giganteum	Pectinida	Limidae	Plagiostoma	1	Early Toarcian		183	182	stationary, attached	suspension feeder	low-level epifaunal	2	1	1	4	62	7068
Corbulomima obscura	Pholadida	Corbulidae	Corbulomima	1	Early Toarcian		183	182	facultatively mobile, attached	suspension feeder	infaunal	5	1	3	5	62	7068
Homomya alsatica	Pholadomyida	Pholadomyidae	Homomya	22	Early Toarcian		183	182	facultatively mobile	suspension feeder	deep infaunal	4	1	3	3	62	7068
Inoperna sowerbiana	Mytilida	Mytilidae	Inoperna	9	Early Toarcian		183	182	stationary, attached	suspension feeder	epifaunal	2	1	1	4	62	7068
Myophorella	Trigoniida	Myophorellidae	Myophorella	4	Early Toarcian		183	182	facultatively mobile	suspension feeder	infaunal	4	1	3	3	62	7068
Osteomya dilata	Pholadomyida	Pholadomyidae	Osteomya	2	Early Toarcian		183	182	facultatively motile, unattached;	suspension feeder	shallow infaunal	4	1	3	3	62	7068
Parvamussium pumilum	Pectinida	Propeamussiidae	Parvamussium	1	Early Toarcian		183	182	facultatively mobile, unattached	carnivore	epifaunal	4	6	1	9	62	7068
Pholadomya (Pholadomya) fidicula	Pholadomyida	Pholadomyidae	Pholadomya (Pholadomya)	1	Early Toarcian		183	182	facultatively mobile	suspension feeder	deep infaunal	4	1	4	14	62	7068
Pholadomya (Pholadomya)	Pholadomyida	Pholadomyidae	Pholadomya (Pholadomya)	6	Early Toarcian		183	182	facultatively mobile	suspension feeder	deep infaunal	4	1	4	14	62	7068
Protocardia striatula	Cardiida	Cardiidae	Protocardia	3	Early Toarcian		183	182	facultatively mobile	suspension feeder	infaunal	4	1	3	3	62	7068
Arcomytilus asper	Mytilida	Mytilidae	Arcomytilus	2	Early Toarcian		183	182	stationary, attached	suspension feeder	epifaunal	2	1	1	4	62	7068
Lima (Mantellum) duplicata	Pectinida	Limidae	Lima (Mantellum)	1	Early Toarcian		183	182	facultatively mobile	suspension feeder	epifaunal	2	1	1	4	62	7068
Parvamussium pumilum	Pectinida	Propeamussiidae	Parvamussium	5	Early Toarcian		183	182	facultatively mobile, unattached	carnivore	epifaunal	4	6	1	9	62	7068
Parvamussium pumilum	Pectinida	Propeamussiidae	Parvamussium	3	Early Toarcian		183	182	facultatively mobile, unattached	carnivore	epifaunal	4	6	1	9	62	7068
Pseudoplacunopsis alpina	Pectinida	Plicatulidae	Pseudoplacunopsis		Rhaetian		208.5	201.3	cemented	suspension feeder	epifaunal	3	1	1	1	58	7658
Rhaetavicula contorta	Ostreida	Pteriidae	Rhaetavicula		Rhaetian		208.5	201.3	stationary, attached, epibiont	suspension feeder	epifaunal	2	1	1	4	58	7658
Gervillia inflata	Ostreida	Bakevelliidae	Gervillia		Rhaetian		208.5	201.3	stationary, attached	suspension feeder	semi-infaunal	2	1	2	16	58	7658
Bakevellia (Bakevelloides) praecursor	Ostreida	Bakevelliidae	Bakevellia (Bakevelloides)		Rhaetian		208.5	201.3	stationary	suspension feeder	semi-infaunal	2	1	2	16	58	7658
Pseudoplacunopsis alpina	Pectinida	Plicatulidae	Pseudoplacunopsis		Rhaetian		208.5	201.3	cemented	suspension feeder	epifaunal	3	1	1	1	58	7658
Palaeocardita austriaca	Cardiida	Palaeocarditidae	Palaeocardita		Rhaetian		208.5	201.3	stationary, attached	suspension feeder	semi-infaunal	2	1	2	16	58	7658
Myophoriopis	Carditida	Myophoricardiidae	Myophoriopis		Rhaetian		208.5	201.3	slow motile	suspension feeder	shallow infaunal	6	1	3	17	58	7658
Isocyprina	Veneroidei	Arcticidae	Isocyprina		Rhaetian		208.5	201.3	facultatively mobile	suspension feeder	infaunal	4	1	3	3	58	7658
Rhaetavicula contorta	Ostreida	Pteriidae	Rhaetavicula		Rhaetian		208.5	201.3	stationary, attached, epibiont	suspension feeder	epifaunal	2	1	1	4	58	7658
Atreta intusstriata	Pectinida	Dimyidae	Atreta		Rhaetian		208.5	201.3	cemented	suspension feeder	epifaunal	3	1	1	1	58	7658
Isocyprina	Veneroidei	Arcticidae	Isocyprina		Rhaetian		208.5	201.3	facultatively mobile	suspension feeder	infaunal	4	1	3	3	58	7658
Gervillia inflata	Ostreida	Bakevelliidae	Gervillia		Rhaetian		208.5	201.3	stationary, attached	suspension feeder	semi-infaunal	2	1	2	16	58	7658
Palaeocardita austriaca	Cardiida	Palaeocarditidae	Palaeocardita		Rhaetian		208.5	201.3	stationary, attached	suspension feeder	semi-infaunal	2	1	2	16	58	7658
Isocyprina	Veneroidei	Arcticidae	Isocyprina		Rhaetian		208.5	201.3	facultatively mobile	suspension feeder	infaunal	4	1	3	3	58	7658
Rhaetavicula contorta	Ostreida	Pteriidae	Rhaetavicula		Rhaetian		208.5	201.3	stationary, attached, epibiont	suspension feeder	epifaunal	2	1	1	4	58	7658
Gervillia inflata	Ostreida	Bakevelliidae	Gervillia		Rhaetian		208.5	201.3	stationary, attached	suspension feeder	semi-infaunal	2	1	2	16	58	7658
Bakevellia (Bakevelloides) praecursor	Ostreida	Bakevelliidae	Bakevellia (Bakevelloides)		Rhaetian		208.5	201.3	stationary	suspension feeder	semi-infaunal	2	1	2	16	58	7658
Pseudoplacunopsis alpina	Pectinida	Plicatulidae	Pseudoplacunopsis		Rhaetian		208.5	201.3	cemented	suspension feeder	epifaunal	3	1	1	1	58	7658
Palaeocardita austriaca	Cardiida	Palaeocarditidae	Palaeocardita		Rhaetian		208.5	201.3	stationary, attached	suspension feeder	semi-infaunal	2	1	2	16	58	7658
Isocyprina	Veneroidei	Arcticidae	Isocyprina		Rhaetian		208.5	201.3	facultatively mobile	suspension feeder	infaunal	4	1	3	3	58	7658
Rhaetavicula contorta	Ostreida	Pteriidae	Rhaetavicula		Rhaetian		208.5	201.3	stationary, attached, epibiont	suspension feeder	epifaunal	2	1	1	4	58	7658
Gervillia inflata	Ostreida	Bakevelliidae	Gervillia		Rhaetian		208.5	201.3	stationary, attached	suspension feeder	semi-infaunal	2	1	2	16	58	7658
Atreta intusstriata	Pectinida	Dimyidae	Atreta		Rhaetian		208.5	201.3	cemented	suspension feeder	epifaunal	3	1	1	1	58	7658
Pseudoplacunopsis alpina	Pectinida	Plicatulidae	Pseudoplacunopsis		Rhaetian		208.5	201.3	cemented	suspension feeder	epifaunal	3	1	1	1	58	7658
Plagiostoma punctatum	Pectinida	Limidae	Plagiostoma		Rhaetian		208.5	201.3	stationary, attached	suspension feeder	low-level epifaunal	2	1	1	4	58	7658
Myophoria inflata	Trigoniida	Myophoriidae	Myophoria		Rhaetian		208.5	201.3	facultatively mobile	suspension feeder	infaunal	4	1	3	3	58	7658
Palaeocardita austriaca	Cardiida	Palaeocarditidae	Palaeocardita		Rhaetian		208.5	201.3	stationary, attached	suspension feeder	semi-infaunal	2	1	2	16	58	7658
Isocyprina	Veneroidei	Arcticidae	Isocyprina		Rhaetian		208.5	201.3	facultatively mobile	suspension feeder	infaunal	4	1	3	3	58	7658
Atreta intusstriata	Pectinida	Dimyidae	Atreta		Rhaetian		208.5	201.3	cemented	suspension feeder	epifaunal	3	1	1	1	58	7658
Plagiostoma punctatum	Pectinida	Limidae	Plagiostoma		Rhaetian		208.5	201.3	stationary, attached	suspension feeder	low-level epifaunal	2	1	1	4	58	7658
Protocardia rhaetica	Cardiida	Cardiidae	Protocardia		Rhaetian		208.5	201.3	facultatively mobile	suspension feeder	infaunal	4	1	3	3	58	7658
Isocyprina	Veneroidei	Arcticidae	Isocyprina		Rhaetian		208.5	201.3	facultatively mobile	suspension feeder	infaunal	4	1	3	3	58	7658
Homomya	Pholadomyida	Pholadomyidae	Homomya		Rhaetian		208.5	201.3	facultatively mobile	suspension feeder	deep infaunal	4	1	3	3	58	7658
Inoperna (Triasoperna) schafhaeutli	Mytilida	Mytilidae	Inoperna (Triasoperna)		Rhaetian		208.5	201.3	stationary, attached	suspension feeder	epifaunal	2	1	1	4	58	7658
Atreta intusstriata	Pectinida	Dimyidae	Atreta		Rhaetian		208.5	201.3	cemented	suspension feeder	epifaunal	3	1	1	1	58	7658
Plagiostoma punctatum	Pectinida	Limidae	Plagiostoma		Rhaetian		208.5	201.3	stationary, attached	suspension feeder	low-level epifaunal	2	1	1	4	58	7658
Protocardia rhaetica	Cardiida	Cardiidae	Protocardia		Rhaetian		208.5	201.3	facultatively mobile	suspension feeder	infaunal	4	1	3	3	58	7658
Homomya	Pholadomyida	Pholadomyidae	Homomya		Rhaetian		208.5	201.3	facultatively mobile	suspension feeder	deep infaunal	4	1	3	3	58	7658
Atreta intusstriata	Pectinida	Dimyidae	Atreta		Rhaetian		208.5	201.3	cemented	suspension feeder	epifaunal	3	1	1	1	58	7658
Plagiostoma punctatum	Pectinida	Limidae	Plagiostoma		Rhaetian		208.5	201.3	stationary, attached	suspension feeder	low-level epifaunal	2	1	1	4	58	7658
Pholadomya	Pholadomyida	Pholadomyidae	Pholadomya		Rhaetian		208.5	201.3	facultatively mobile	suspension feeder	deep infaunal	4	1	4	14	58	7658
Cassianella	Ostreida	Cassianellidae	Cassianella		Rhaetian		208.5	201.3	stationary, unattached	suspension feeder	epifaunal	1	1	1	12	58	7658
Oxytoma inequivalvis	Pectinida	Oxytomidae	Oxytoma		Rhaetian		208.5	201.3	facultatively mobile, attached	suspension feeder	epifaunal	5	1	1	19	58	7658
Oxytoma inequivalvis	Pectinida	Oxytomidae	Oxytoma		Rhaetian		208.5	201.3	facultatively mobile, attached	suspension feeder	epifaunal	5	1	1	19	58	7658
Cassianella	Ostreida	Cassianellidae	Cassianella		Rhaetian		208.5	201.3	stationary, unattached	suspension feeder	epifaunal	1	1	1	12	58	7658
Cassianella	Ostreida	Cassianellidae	Cassianella		Rhaetian		208.5	201.3	stationary, unattached	suspension feeder	epifaunal	1	1	1	12	58	7658
Protocardia rhaetica	Cardiida	Cardiidae	Protocardia		Rhaetian		208.5	201.3	facultatively mobile	suspension feeder	infaunal	4	1	3	3	58	7658
Cassianella	Ostreida	Cassianellidae	Cassianella		Rhaetian		208.5	201.3	stationary, unattached	suspension feeder	epifaunal	1	1	1	12	58	7658
Inoperna (Triasoperna) schafhaeutli	Mytilida	Mytilidae	Inoperna (Triasoperna)		Rhaetian		208.5	201.3	stationary, attached	suspension feeder	epifaunal	2	1	1	4	58	7658
Atreta intusstriata	Pectinida	Dimyidae	Atreta		Rhaetian		208.5	201.3	cemented	suspension feeder	epifaunal	3	1	1	1	58	7658
Oxytoma inequivalvis	Pectinida	Oxytomidae	Oxytoma		Rhaetian		208.5	201.3	facultatively mobile, attached	suspension feeder	epifaunal	5	1	1	19	58	7658
Atreta intusstriata	Pectinida	Dimyidae	Atreta		Rhaetian		208.5	201.3	cemented	suspension feeder	epifaunal	3	1	1	1	58	7658
Cassianella	Ostreida	Cassianellidae	Cassianella		Rhaetian		208.5	201.3	stationary, unattached	suspension feeder	epifaunal	1	1	1	12	58	7658
Cassianella	Ostreida	Cassianellidae	Cassianella		Rhaetian		208.5	201.3	stationary, unattached	suspension feeder	epifaunal	1	1	1	12	58	7658
Cassianella	Ostreida	Cassianellidae	Cassianella		Rhaetian		208.5	201.3	stationary, unattached	suspension feeder	epifaunal	1	1	1	12	58	7658
Rhaetavicula contorta	Ostreida	Pteriidae	Rhaetavicula		Rhaetian		208.5	201.3	stationary, attached, epibiont	suspension feeder	epifaunal	2	1	1	4	58	7658
Gervillia inflata	Ostreida	Bakevelliidae	Gervillia		Rhaetian		208.5	201.3	stationary, attached	suspension feeder	semi-infaunal	2	1	2	16	58	7658
Pseudoplacunopsis alpina	Pectinida	Plicatulidae	Pseudoplacunopsis		Rhaetian		208.5	201.3	cemented	suspension feeder	epifaunal	3	1	1	1	58	7658
Palaeocardita austriaca	Cardiida	Palaeocarditidae	Palaeocardita		Rhaetian		208.5	201.3	stationary, attached	suspension feeder	semi-infaunal	2	1	2	16	58	7658
Isocyprina (Eotrapezium)	Veneroidei	Arcticidae	Isocyprina (Eotrapezium)		Rhaetian		208.5	201.3	facultatively mobile	suspension feeder	infaunal	4	1	3	3	58	7658
Gervillia inflata	Ostreida	Bakevelliidae	Gervillia		Rhaetian		208.5	201.3	stationary, attached	suspension feeder	semi-infaunal	2	1	2	16	58	7658
Atreta intusstriata	Pectinida	Dimyidae	Atreta		Rhaetian		208.5	201.3	cemented	suspension feeder	epifaunal	3	1	1	1	58	7658
Plagiostoma punctatum	Pectinida	Limidae	Plagiostoma		Rhaetian		208.5	201.3	stationary, attached	suspension feeder	low-level epifaunal	2	1	1	4	58	7658
Inoperna (Triasoperna) schafhaeutli	Mytilida	Mytilidae	Inoperna (Triasoperna)		Rhaetian		208.5	201.3	stationary, attached	suspension feeder	epifaunal	2	1	1	4	58	7658
Myophoriopis	Carditida	Myophoricardiidae	Myophoriopis		Rhaetian		208.5	201.3	slow motile	suspension feeder	shallow infaunal	6	1	3	17	58	7658
Isocyprina (Eotrapezium)	Veneroidei	Arcticidae	Isocyprina (Eotrapezium)		Rhaetian		208.5	201.3	facultatively mobile	suspension feeder	infaunal	4	1	3	3	58	7658
Cassianella	Ostreida	Cassianellidae	Cassianella		Rhaetian		208.5	201.3	stationary, unattached	suspension feeder	epifaunal	1	1	1	12	58	7658
Inoperna (Triasoperna) schafhaeutli	Mytilida	Mytilidae	Inoperna (Triasoperna)		Rhaetian		208.5	201.3	stationary, attached	suspension feeder	epifaunal	2	1	1	4	58	7658
Cassianella	Ostreida	Cassianellidae	Cassianella		Rhaetian		208.5	201.3	stationary, unattached	suspension feeder	epifaunal	1	1	1	12	58	7658
Protocardia rhaetica	Cardiida	Cardiidae	Protocardia		Rhaetian		208.5	201.3	facultatively mobile	suspension feeder	infaunal	4	1	3	3	58	7658
Homomya	Pholadomyida	Pholadomyidae	Homomya		Rhaetian		208.5	201.3	facultatively mobile	suspension feeder	deep infaunal	4	1	3	3	58	7658
Atreta intusstriata	Pectinida	Dimyidae	Atreta		Rhaetian		208.5	201.3	cemented	suspension feeder	epifaunal	3	1	1	1	58	7658
Plagiostoma punctatum	Pectinida	Limidae	Plagiostoma		Rhaetian		208.5	201.3	stationary, attached	suspension feeder	low-level epifaunal	2	1	1	4	58	7658
Myophoria inflata	Trigoniida	Myophoriidae	Myophoria		Rhaetian		208.5	201.3	facultatively mobile	suspension feeder	infaunal	4	1	3	3	58	7658
Protocardia rhaetica	Cardiida	Cardiidae	Protocardia		Rhaetian		208.5	201.3	facultatively mobile	suspension feeder	infaunal	4	1	3	3	58	7658
Myophoriopis	Carditida	Myophoricardiidae	Myophoriopis		Rhaetian		208.5	201.3	slow motile	suspension feeder	shallow infaunal	6	1	3	17	58	7658
Isocyprina (Eotrapezium)	Veneroidei	Arcticidae	Isocyprina (Eotrapezium)		Rhaetian		208.5	201.3	facultatively mobile	suspension feeder	infaunal	4	1	3	3	58	7658
Homomya	Pholadomyida	Pholadomyidae	Homomya		Rhaetian		208.5	201.3	facultatively mobile	suspension feeder	deep infaunal	4	1	3	3	58	7658
Atreta intusstriata	Pectinida	Dimyidae	Atreta		Rhaetian		208.5	201.3	cemented	suspension feeder	epifaunal	3	1	1	1	58	7658
Pseudoplacunopsis alpina	Pectinida	Plicatulidae	Pseudoplacunopsis		Rhaetian		208.5	201.3	cemented	suspension feeder	epifaunal	3	1	1	1	58	7658
Palaeocardita austriaca	Cardiida	Palaeocarditidae	Palaeocardita		Rhaetian		208.5	201.3	stationary, attached	suspension feeder	semi-infaunal	2	1	2	16	58	7658
Protocardia rhaetica	Cardiida	Cardiidae	Protocardia		Rhaetian		208.5	201.3	facultatively mobile	suspension feeder	infaunal	4	1	3	3	58	7658
Rhaetavicula contorta	Ostreida	Pteriidae	Rhaetavicula		Rhaetian		208.5	201.3	stationary, attached, epibiont	suspension feeder	epifaunal	2	1	1	4	58	7658
Atreta intusstriata	Pectinida	Dimyidae	Atreta		Rhaetian		208.5	201.3	cemented	suspension feeder	epifaunal	3	1	1	1	58	7658
Pseudoplacunopsis alpina	Pectinida	Plicatulidae	Pseudoplacunopsis		Rhaetian		208.5	201.3	cemented	suspension feeder	epifaunal	3	1	1	1	58	7658
Atreta intusstriata	Pectinida	Dimyidae	Atreta		Rhaetian		208.5	201.3	cemented	suspension feeder	epifaunal	3	1	1	1	58	7658
Plagiostoma punctatum	Pectinida	Limidae	Plagiostoma		Rhaetian		208.5	201.3	stationary, attached	suspension feeder	low-level epifaunal	2	1	1	4	58	7658
Pholadomya	Pholadomyida	Pholadomyidae	Pholadomya		Rhaetian		208.5	201.3	facultatively mobile	suspension feeder	deep infaunal	4	1	4	14	58	7658
Cassianella	Ostreida	Cassianellidae	Cassianella		Rhaetian		208.5	201.3	stationary, unattached	suspension feeder	epifaunal	1	1	1	12	58	7658
Oxytoma inequivalvis	Pectinida	Oxytomidae	Oxytoma		Rhaetian		208.5	201.3	facultatively mobile, attached	suspension feeder	epifaunal	5	1	1	19	58	7658
Cassianella	Ostreida	Cassianellidae	Cassianella		Rhaetian		208.5	201.3	stationary, unattached	suspension feeder	epifaunal	1	1	1	12	58	7658
Inoperna (Triasoperna) schafhaeutli	Mytilida	Mytilidae	Inoperna (Triasoperna)		Rhaetian		208.5	201.3	stationary, attached	suspension feeder	epifaunal	2	1	1	4	58	7658
Pseudoplacunopsis alpina	Pectinida	Plicatulidae	Pseudoplacunopsis		Rhaetian		208.5	201.3	cemented	suspension feeder	epifaunal	3	1	1	1	58	7658
Pseudoplacunopsis alpina	Pectinida	Plicatulidae	Pseudoplacunopsis		Rhaetian		208.5	201.3	cemented	suspension feeder	epifaunal	3	1	1	1	58	7658
Pseudoplacunopsis alpina	Pectinida	Plicatulidae	Pseudoplacunopsis		Rhaetian		208.5	201.3	cemented	suspension feeder	epifaunal	3	1	1	1	58	7658
Rhaetavicula contorta	Ostreida	Pteriidae	Rhaetavicula		Rhaetian		208.5	201.3	stationary, attached, epibiont	suspension feeder	epifaunal	2	1	1	4	58	7658
Gervillia inflata	Ostreida	Bakevelliidae	Gervillia		Rhaetian		208.5	201.3	stationary, attached	suspension feeder	semi-infaunal	2	1	2	16	58	7658
Pseudoplacunopsis alpina	Pectinida	Plicatulidae	Pseudoplacunopsis		Rhaetian		208.5	201.3	cemented	suspension feeder	epifaunal	3	1	1	1	58	7658
Isocyprina (Eotrapezium)	Veneroidei	Arcticidae	Isocyprina (Eotrapezium)		Rhaetian		208.5	201.3	facultatively mobile	suspension feeder	infaunal	4	1	3	3	58	7658
Atreta intusstriata	Pectinida	Dimyidae	Atreta		Rhaetian		208.5	201.3	cemented	suspension feeder	epifaunal	3	1	1	1	58	7658
Myophoria inflata	Trigoniida	Myophoriidae	Myophoria		Rhaetian		208.5	201.3	facultatively mobile	suspension feeder	infaunal	4	1	3	3	58	7658
Nuculana	Nuculanida	Nuculanidae	Nuculana		Rhaetian		208.5	201.3	slow motile	deposit feeder, suspension feeder	infaunal	6	2	3	2	58	7658
Rhaetavicula contorta	Ostreida	Pteriidae	Rhaetavicula		Rhaetian		208.5	201.3	stationary, attached, epibiont	suspension feeder	epifaunal	2	1	1	4	58	7658
Gervillia inflata	Ostreida	Bakevelliidae	Gervillia		Rhaetian		208.5	201.3	stationary, attached	suspension feeder	semi-infaunal	2	1	2	16	58	7658
Isocyprina (Eotrapezium)	Veneroidei	Arcticidae	Isocyprina (Eotrapezium)		Rhaetian		208.5	201.3	facultatively mobile	suspension feeder	infaunal	4	1	3	3	58	7658
Atreta intusstriata	Pectinida	Dimyidae	Atreta		Rhaetian		208.5	201.3	cemented	suspension feeder	epifaunal	3	1	1	1	58	7658
Plagiostoma punctatum	Pectinida	Limidae	Plagiostoma		Rhaetian		208.5	201.3	stationary, attached	suspension feeder	low-level epifaunal	2	1	1	4	58	7658
Myophoria inflata	Trigoniida	Myophoriidae	Myophoria		Rhaetian		208.5	201.3	facultatively mobile	suspension feeder	infaunal	4	1	3	3	58	7658
Palaeocardita austriaca	Cardiida	Palaeocarditidae	Palaeocardita		Rhaetian		208.5	201.3	stationary, attached	suspension feeder	semi-infaunal	2	1	2	16	58	7658
Atreta intusstriata	Pectinida	Dimyidae	Atreta		Rhaetian		208.5	201.3	cemented	suspension feeder	epifaunal	3	1	1	1	58	7658
Rhaetavicula contorta	Ostreida	Pteriidae	Rhaetavicula		Rhaetian		208.5	201.3	stationary, attached, epibiont	suspension feeder	epifaunal	2	1	1	4	58	7658
Gervillia inflata	Ostreida	Bakevelliidae	Gervillia		Rhaetian		208.5	201.3	stationary, attached	suspension feeder	semi-infaunal	2	1	2	16	58	7658
Palaeocardita austriaca	Cardiida	Palaeocarditidae	Palaeocardita		Rhaetian		208.5	201.3	stationary, attached	suspension feeder	semi-infaunal	2	1	2	16	58	7658
Nuculana	Nuculanida	Nuculanidae	Nuculana		Rhaetian		208.5	201.3	slow motile	deposit feeder, suspension feeder	infaunal	6	2	3	2	58	7658
Rhaetavicula contorta	Ostreida	Pteriidae	Rhaetavicula		Rhaetian		208.5	201.3	stationary, attached, epibiont	suspension feeder	epifaunal	2	1	1	4	58	7658
Gervillia inflata	Ostreida	Bakevelliidae	Gervillia		Rhaetian		208.5	201.3	stationary, attached	suspension feeder	semi-infaunal	2	1	2	16	58	7658
Rhaetavicula contorta	Ostreida	Pteriidae	Rhaetavicula		Rhaetian		208.5	201.3	stationary, attached, epibiont	suspension feeder	epifaunal	2	1	1	4	58	7658
Gervillia inflata	Ostreida	Bakevelliidae	Gervillia		Rhaetian		208.5	201.3	stationary, attached	suspension feeder	semi-infaunal	2	1	2	16	58	7658
Pseudoplacunopsis alpina	Pectinida	Plicatulidae	Pseudoplacunopsis		Rhaetian		208.5	201.3	cemented	suspension feeder	epifaunal	3	1	1	1	58	7658
Palaeocardita austriaca	Cardiida	Palaeocarditidae	Palaeocardita		Rhaetian		208.5	201.3	stationary, attached	suspension feeder	semi-infaunal	2	1	2	16	58	7658
Myophoriopis	Carditida	Myophoricardiidae	Myophoriopis		Rhaetian		208.5	201.3	slow motile	suspension feeder	shallow infaunal	6	1	3	17	58	7658
Nuculana	Nuculanida	Nuculanidae	Nuculana		Rhaetian		208.5	201.3	slow motile	deposit feeder, suspension feeder	infaunal	6	2	3	2	58	7658
Bakevellia (Bakevelloides) praecursor	Ostreida	Bakevelliidae	Bakevellia (Bakevelloides)		Rhaetian		208.5	201.3	stationary	suspension feeder	semi-infaunal	2	1	2	16	58	7658
Isocyprina (Eotrapezium)	Veneroidei	Arcticidae	Isocyprina (Eotrapezium)		Rhaetian		208.5	201.3	facultatively mobile	suspension feeder	infaunal	4	1	3	3	58	7658
Bakevellia (Bakevelloides) praecursor	Ostreida	Bakevelliidae	Bakevellia (Bakevelloides)		Rhaetian		208.5	201.3	stationary	suspension feeder	semi-infaunal	2	1	2	16	58	7658
Isocyprina (Eotrapezium)	Veneroidei	Arcticidae	Isocyprina (Eotrapezium)		Rhaetian		208.5	201.3	facultatively mobile	suspension feeder	infaunal	4	1	3	3	58	7658
Atreta intusstriata	Pectinida	Dimyidae	Atreta		Rhaetian		208.5	201.3	cemented	suspension feeder	epifaunal	3	1	1	1	58	7658
Plagiostoma punctatum	Pectinida	Limidae	Plagiostoma		Rhaetian		208.5	201.3	stationary, attached	suspension feeder	low-level epifaunal	2	1	1	4	58	7658
Myophoria inflata	Trigoniida	Myophoriidae	Myophoria		Rhaetian		208.5	201.3	facultatively mobile	suspension feeder	infaunal	4	1	3	3	58	7658
Palaeocardita austriaca	Cardiida	Palaeocarditidae	Palaeocardita		Rhaetian		208.5	201.3	stationary, attached	suspension feeder	semi-infaunal	2	1	2	16	58	7658
Atreta intusstriata	Pectinida	Dimyidae	Atreta		Rhaetian		208.5	201.3	cemented	suspension feeder	epifaunal	3	1	1	1	58	7658
Rhaetavicula contorta	Ostreida	Pteriidae	Rhaetavicula		Rhaetian		208.5	201.3	stationary, attached, epibiont	suspension feeder	epifaunal	2	1	1	4	58	7658
Gervillia inflata	Ostreida	Bakevelliidae	Gervillia		Rhaetian		208.5	201.3	stationary, attached	suspension feeder	semi-infaunal	2	1	2	16	58	7658
Bakevellia (Bakevelloides) praecursor	Ostreida	Bakevelliidae	Bakevellia (Bakevelloides)		Rhaetian		208.5	201.3	stationary	suspension feeder	semi-infaunal	2	1	2	16	58	7658
Pseudoplacunopsis alpina	Pectinida	Plicatulidae	Pseudoplacunopsis		Rhaetian		208.5	201.3	cemented	suspension feeder	epifaunal	3	1	1	1	58	7658
Palaeocardita austriaca	Cardiida	Palaeocarditidae	Palaeocardita		Rhaetian		208.5	201.3	stationary, attached	suspension feeder	semi-infaunal	2	1	2	16	58	7658
Isocyprina (Eotrapezium)	Veneroidei	Arcticidae	Isocyprina (Eotrapezium)		Rhaetian		208.5	201.3	facultatively mobile	suspension feeder	infaunal	4	1	3	3	58	7658
Bakevellia (Bakevelloides) praecursor	Ostreida	Bakevelliidae	Bakevellia (Bakevelloides)		Rhaetian		208.5	201.3	stationary	suspension feeder	semi-infaunal	2	1	2	16	58	7658
Pseudoplacunopsis alpina	Pectinida	Plicatulidae	Pseudoplacunopsis		Rhaetian		208.5	201.3	cemented	suspension feeder	epifaunal	3	1	1	1	58	7658
Isocyprina (Eotrapezium)	Veneroidei	Arcticidae	Isocyprina (Eotrapezium)		Rhaetian		208.5	201.3	facultatively mobile	suspension feeder	infaunal	4	1	3	3	58	7658
Rhaetavicula contorta	Ostreida	Pteriidae	Rhaetavicula		Rhaetian		208.5	201.3	stationary, attached, epibiont	suspension feeder	epifaunal	2	1	1	4	58	7658
Atreta intusstriata	Pectinida	Dimyidae	Atreta		Rhaetian		208.5	201.3	cemented	suspension feeder	epifaunal	3	1	1	1	58	7658
Pseudoplacunopsis alpina	Pectinida	Plicatulidae	Pseudoplacunopsis		Rhaetian		208.5	201.3	cemented	suspension feeder	epifaunal	3	1	1	1	58	7658
Plagiostoma punctatum	Pectinida	Limidae	Plagiostoma		Rhaetian		208.5	201.3	stationary, attached	suspension feeder	low-level epifaunal	2	1	1	4	58	7658
Bakevellia (Bakevelloides) praecursor	Ostreida	Bakevelliidae	Bakevellia (Bakevelloides)		Rhaetian		208.5	201.3	stationary	suspension feeder	semi-infaunal	2	1	2	16	58	7658
Isocyprina (Eotrapezium)	Veneroidei	Arcticidae	Isocyprina (Eotrapezium)		Rhaetian		208.5	201.3	facultatively mobile	suspension feeder	infaunal	4	1	3	3	58	7658
Atreta intusstriata	Pectinida	Dimyidae	Atreta		Rhaetian		208.5	201.3	cemented	suspension feeder	epifaunal	3	1	1	1	58	7658
[truncated: 29,326 more rows]

## Sheet: Ecology reference
Ecology References
Aronson, R.B. and Harms, C.A. Ophiuroids in a Bahamian saltwater lake: the ecology of a Paleozoic-like community. Ecology 66, 1472-1483 (1985).
Bambach, R.K., Bush, A.M and Erwin, D.H. Autecology and the filling of ecospace: Key metazoan radiations. Palaeontology 50, 1-22 (2007).
Checa, A.G. and Jimenez-Jimenez, A.P. Evolutionary morphology of oblique ribs of bivalves. Palaeontology 46, 709-724 (2003).
Conway, N.M. et al. Characterisation and site description of Solemya borealis (Bivalavia; Solemyidae), another bivalve-bacteria symbiosis. Marine Biology 112, 601-613 (1992).
Damborenea, S.E. and Mancenido, M.O. Biofacies analysis of Hettangian-Sinemurian bivalve/brachiopod associations from the Neuquen Basin (Argentina). Geologica Acta 3, 163-178 (2005).
Foster W J, Twitchett R J. Functional diversity of marine ecosystems after the Late Permian mass extinction event[J]. Nature Geoscience, 2014, 7(3): 233-238.
Harper, E.M. and Skelton, P.W. The Mesozoic Marine Revolution and epifaunal bivalves. Scripta Geol., Spec 2, 127-153 (1993).
Komatsu, T., Chen, J-H., Cao, M-Z., Stiller, F and Naruse, H. Middle Triassic (Anisian) diversified bivalves: depositional environments and bivalve assemblages in the Leidapo Member of the Qingyan Formation, southern China. Palaeogeography, Palaeoclimatology, Palaeoecology 208, 207-223 (2004).
Nevesskaja, L.A. Ethological-Trophic groups of bivalve mollusks and their distribution in the Phanerozoic. Palaeontological Journal 40, 375-390 (2006).
Posenato, R. Patterns of bivalve biodiversity from Early to Middle Triassic in the Southern Alps (Italy): regional vs. global events. Palaeogeography, Palaeoclimatology, Palaeoecology 261, 145-159 (2008).
Ros, S., De Renzi, M., Damborenea, S.E. and Marquez-Aliaga, A. Coping between crises: Early Triassic-early Jurassic bivalve diversity dynamics. Palaeogeography, Palaeoclimatology, Palaeoecology 311, 184-199 (2011).
Runnegar, B. Anatomy of Pholadomya candida (Bivalvia) and the origin of the Pholadomyidae. Proceedings of the Malacological Society London 40, 45-71 (1972).
Stanley, S.M. Post-Paleozoic adaptive radiation of infaunal bivalve molluscs: a consequence of mantle fusion and siphon development. Journal of Paleontology 42, 214-229 (1968).
Stanley, S.M. Functional morphology and evolution of bysally attached bivalve molluscs. Journal of Paleontology 46, 165-212 (1972).
Stanley, S.M. Paleoecology of Subulites: a gastropod in the Middle Ordovician of central Tennessee. Journal of Paleontology 51, 161-168 (1977).
